# Supplementary material
Source: publisher figshare collection journal article supplement (https://acs.figshare.com/ndownloader/files/4137670)
Supplement: Supplementary file 1 [file 4137670]

# 1. SUBMISSION DETAILS

_publ_requested_journal  'Inorganic Chemistry'

#=============================================================================
# 2. TITLE AND AUTHOR LIST
_publ_section_title
;
Synthesis and reactivity towards CH3I of cis-[RhI(CO)2L] complexes containing nitrogen ligands
;

loop_
_publ_author_name
'Romain J. Adcock'
'Duc Hanh Nguyen'
'Sonia Ladeira'
'Carole Le Berre'
'Philippe Serp'
'Philippe Kalck'
;

;

data_3a
#----------------------------------------------------------------------------#
#                   CHEMICAL INFORMATION                                     #
#----------------------------------------------------------------------------#
 
_chemical_name_systematic
;
 ?
;
_chemical_formula_moiety                'C6 H11 Cl N O2 Rh'
_chemical_formula_sum                   'C6 H11 Cl N O2 Rh'
_chemical_formula_weight                267.52
_chemical_compound_source               'synthesis as described'
 
#----------------------------------------------------------------------------#
#                   UNIT CELL INFORMATION                                    #
#----------------------------------------------------------------------------#
 
_symmetry_cell_setting                  triclinic
_symmetry_space_group_name_H-M          'P -1'
_symmetry_space_group_name_Hall         '-P 1'
_symmetry_Int_Tables_number             2
loop_
    _symmetry_equiv_pos_as_xyz
'x, y, z'
'-x, -y, -z'
 
_cell_length_a                          7.2049(3)
_cell_length_b                          7.4749(3)
_cell_length_c                          10.7705(4)
_cell_angle_alpha                       79.193(3)
_cell_angle_beta                        76.434(3)
_cell_angle_gamma                       61.200(4)
_cell_volume                            492.23(4)
_cell_formula_units_Z                   2
_cell_measurement_temperature           180(2)
_cell_measurement_reflns_used           8457
_cell_measurement_theta_min             3.3235
_cell_measurement_theta_max             29.0082
_cell_measurement_wavelength            0.71073
 
#----------------------------------------------------------------------------#
#                   CRYSTAL INFORMATION                                      #
#----------------------------------------------------------------------------#
 
_exptl_crystal_description              block
_exptl_crystal_colour                   yellow
_exptl_crystal_size_max                 0.15
_exptl_crystal_size_mid                 0.15
_exptl_crystal_size_min                 0.1
_exptl_crystal_density_diffrn           1.805
_exptl_crystal_density_method           'not measured'
_exptl_crystal_F_000                    264
_exptl_special_details
;
 ?
;
 
#----------------------------------------------------------------------------#
#                   ABSORPTION CORRECTION                                    #
#----------------------------------------------------------------------------#
 
_exptl_absorpt_coefficient_mu           1.962
_exptl_absorpt_correction_type          multi-scan
_exptl_absorpt_process_details
;
        CrysAlisPro, Oxford Diffraction Ltd.,
Version 1.171.33.66 (release 28-04-2010 CrysAlis171 .NET)
(compiled Apr 28 2010,14:27:37)
Empirical absorption correction using spherical harmonics,
 implemented in SCALE3 ABSPACK scaling algorithm.
;
_exptl_absorpt_correction_T_min         0.750
_exptl_absorpt_correction_T_max         0.822
 
#----------------------------------------------------------------------------#
#                   DATA COLLECTION                                          #
#----------------------------------------------------------------------------#
 
_diffrn_ambient_temperature             180(2)
_diffrn_radiation_wavelength            0.71073
_diffrn_radiation_type                  MoK\a
_diffrn_radiation_source          'Enhance (Mo) X-ray Source'
_diffrn_radiation_monochromator   'graphite'
_diffrn_measurement_device_type   'Xcalibur, Eos, Gemini ultra'
_diffrn_measurement_method        \w-\f
_diffrn_standards_number          0
_diffrn_standards_interval_count  0
_diffrn_standards_interval_time   0
_diffrn_standards_decay_%         0
_diffrn_radiation_probe                 x-ray
_diffrn_reflns_av_R_equivalents         0.0272
_diffrn_reflns_av_unetI/netI            0.018
_diffrn_reflns_number                   10786
_diffrn_reflns_limit_h_min              -9
_diffrn_reflns_limit_h_max              9
_diffrn_reflns_limit_k_min              -9
_diffrn_reflns_limit_k_max              9
_diffrn_reflns_limit_l_min              -14
_diffrn_reflns_limit_l_max              14
_diffrn_reflns_theta_min                3.33
_diffrn_reflns_theta_max                27.87
_diffrn_reflns_theta_full               27.87
_diffrn_measured_fraction_theta_full
                                        0.969
_diffrn_measured_fraction_theta_max
                                        0.969
_reflns_number_total                    2279
_reflns_number_gt                       2177
_reflns_threshold_expression            >2sigma(I)
 
#----------------------------------------------------------------------------#
#                   COMPUTER PROGRAMS USED                                   #
#----------------------------------------------------------------------------#
 
_computing_data_collection              'CrysAlisPro, Oxford Diffraction Ltd.'
_computing_cell_refinement              'CrysAlisPro, Oxford Diffraction Ltd.'
_computing_data_reduction               'CrysAlisPro, Oxford Diffraction Ltd.' 
_computing_structure_solution           'SIR92 (Giacovazzo et al, 1993)'
_computing_structure_refinement         'SHELXL-97 (Sheldrick, 1997)'
_computing_molecular_graphics           'Ortep-3 for Windows (Farrugia, 1997)'
_computing_publication_material
                                   'WinGX publication routines (Farrugia, 1999)'
 
#----------------------------------------------------------------------------#
#                   STRUCTURE SOLUTION
#----------------------------------------------------------------------------#
 
_atom_sites_solution_primary            direct
_atom_sites_solution_secondary          difmap
_atom_sites_solution_hydrogens          geom
 
#----------------------------------------------------------------------------#
#                   REFINEMENT INFORMATION                                   #
#----------------------------------------------------------------------------#
 
_refine_special_details
;
 Refinement of F^2^ against ALL reflections.  The weighted R-factor wR and
 goodness of fit S are based on F^2^, conventional R-factors R are based
 on F, with F set to zero for negative F^2^. The threshold expression of
 F^2^ > 2sigma(F^2^) is used only for calculating R-factors(gt) etc. and is
 not relevant to the choice of reflections for refinement.  R-factors based
 on F^2^ are statistically about twice as large as those based on F, and R-
 factors based on ALL data will be even larger.
;
_refine_ls_structure_factor_coef        Fsqd
_refine_ls_matrix_type                  full
_refine_ls_weighting_scheme             calc
_refine_ls_weighting_details
         'calc w=1/[\s^2^(Fo^2^)+(0.0096P)^2^+0.2317P] where P=(Fo^2^+2Fc^2^)/3'
_refine_ls_hydrogen_treatment           mixed
_refine_ls_extinction_method            none
_refine_ls_number_reflns                2279
_refine_ls_number_parameters            105
_refine_ls_number_restraints            1
_refine_ls_R_factor_all                 0.0173
_refine_ls_R_factor_gt                  0.0158
_refine_ls_wR_factor_ref                0.0377
_refine_ls_wR_factor_gt                 0.0372
_refine_ls_goodness_of_fit_ref          1.163
_refine_ls_restrained_S_all             1.163
_refine_ls_shift/su_max                 0.001
_refine_ls_shift/su_mean                0
_refine_diff_density_max                0.337
_refine_diff_density_min                -0.349
_refine_diff_density_rms                0.055
 
#----------------------------------------------------------------------------#
#                   ATOMIC TYPES, COORDINATES AND THERMAL PARAMETERS         #
#----------------------------------------------------------------------------#
 
loop_
    _atom_type_symbol
    _atom_type_description
    _atom_type_scat_dispersion_real
    _atom_type_scat_dispersion_imag
    _atom_type_scat_source
C C 0.0033 0.0016 'International Tables Vol C Tables 4.2.6.8 and 6.1.1.4'
H H 0 0 'International Tables Vol C Tables 4.2.6.8 and 6.1.1.4'
N N 0.0061 0.0033 'International Tables Vol C Tables 4.2.6.8 and 6.1.1.4'
O O 0.0106 0.006 'International Tables Vol C Tables 4.2.6.8 and 6.1.1.4'
Cl Cl 0.1484 0.1585 'International Tables Vol C Tables 4.2.6.8 and 6.1.1.4'
Rh Rh -1.1178 0.9187 'International Tables Vol C Tables 4.2.6.8 and 6.1.1.4'
 
loop_
    _atom_site_label
    _atom_site_type_symbol
    _atom_site_fract_x
    _atom_site_fract_y
    _atom_site_fract_z
    _atom_site_U_iso_or_equiv
    _atom_site_adp_type
    _atom_site_occupancy
    _atom_site_symmetry_multiplicity
    _atom_site_calc_flag
    _atom_site_refinement_flags
    _atom_site_disorder_assembly
    _atom_site_disorder_group
C1 C 0.1376(3) 0.6563(3) 0.4180(2) 0.0369(4) Uani 1 1 d . . .
C2 C 0.4647(3) 0.2913(3) 0.45278(19) 0.0345(4) Uani 1 1 d . . .
C3 C 0.8440(3) 0.2601(3) 0.1944(2) 0.0346(4) Uani 1 1 d . . .
H3A H 0.956 0.1778 0.1264 0.041 Uiso 1 1 calc R . .
H3B H 0.8846 0.1889 0.2784 0.041 Uiso 1 1 calc R . .
C4 C 0.8334(3) 0.4696(3) 0.1805(2) 0.0429(5) Uani 1 1 d . . .
H4A H 0.7842 0.5437 0.1 0.064 Uiso 1 1 calc R . .
H4B H 0.9765 0.4546 0.18 0.064 Uiso 1 1 calc R . .
H4C H 0.7328 0.5464 0.2527 0.064 Uiso 1 1 calc R . .
C5 C 0.6498(3) 0.0691(3) 0.18472(19) 0.0316(4) Uani 1 1 d . . .
H5A H 0.6908 -0.0126 0.2664 0.038 Uiso 1 1 calc R . .
H5B H 0.7639 -0.0029 0.1139 0.038 Uiso 1 1 calc R . .
C6 C 0.4400(3) 0.0845(3) 0.1684(2) 0.0373(5) Uani 1 1 d . . .
H6A H 0.3277 0.1527 0.2396 0.056 Uiso 1 1 calc R . .
H6B H 0.4562 -0.0533 0.1679 0.056 Uiso 1 1 calc R . .
H6C H 0.3998 0.1641 0.0872 0.056 Uiso 1 1 calc R . .
N1 N 0.6335(2) 0.2755(2) 0.18512(14) 0.0253(3) Uani 1 1 d D . .
H1A H 0.612(3) 0.331(3) 0.1080(11) 0.03 Uiso 1 1 d D . .
O1 O -0.0031(3) 0.7725(3) 0.48015(17) 0.0593(5) Uani 1 1 d . . .
O2 O 0.5219(3) 0.1793(2) 0.53891(14) 0.0500(4) Uani 1 1 d . . .
Cl1 Cl 0.24681(7) 0.69343(7) 0.13308(5) 0.03296(10) Uani 1 1 d . . .
Rh1 Rh 0.36942(2) 0.47164(2) 0.313154(13) 0.02503(5) Uani 1 1 d . . .
 
loop_
    _atom_site_aniso_label
    _atom_site_aniso_U_11
    _atom_site_aniso_U_22
    _atom_site_aniso_U_33
    _atom_site_aniso_U_23
    _atom_site_aniso_U_13
    _atom_site_aniso_U_12
C1 0.0341(10) 0.0379(11) 0.0375(11) -0.0058(9) 0.0007(9) -0.0178(9)
C2 0.0397(11) 0.0333(10) 0.0336(10) -0.0075(9) -0.0018(9) -0.0196(9)
C3 0.0235(9) 0.0322(10) 0.0453(11) -0.0055(9) -0.0054(8) -0.0101(8)
C4 0.0294(10) 0.0406(12) 0.0614(14) -0.0069(10) -0.0033(10) -0.0192(9)
C5 0.0335(10) 0.0200(9) 0.0366(10) -0.0033(7) -0.0051(8) -0.0087(8)
C6 0.0412(11) 0.0299(10) 0.0451(12) -0.0055(9) -0.0108(9) -0.0174(9)
N1 0.0241(7) 0.0217(7) 0.0268(8) -0.0015(6) -0.0047(6) -0.0080(6)
O1 0.0457(9) 0.0546(11) 0.0589(11) -0.0221(9) 0.0133(8) -0.0120(8)
O2 0.0722(11) 0.0448(9) 0.0347(8) 0.0058(7) -0.0168(8) -0.0279(8)
Cl1 0.0296(2) 0.0254(2) 0.0352(2) -0.00031(18) -0.00640(18) -0.00626(18)
Rh1 0.02428(8) 0.02321(8) 0.02736(8) -0.00362(5) -0.00181(5) -0.01132(6)
 
 
#----------------------------------------------------------------------------#
#                   MOLECULAR GEOMETRY                                       #
#----------------------------------------------------------------------------#
 
_geom_special_details
;
 All esds (except the esd in the dihedral angle between two l.s. planes)
 are estimated using the full covariance matrix.  The cell esds are taken
 into account individually in the estimation of esds in distances, angles
 and torsion angles; correlations between esds in cell parameters are only
 used when they are defined by crystal symmetry.  An approximate (isotropic)
 treatment of cell esds is used for estimating esds involving l.s. planes.
;
loop_
    _geom_bond_atom_site_label_1
    _geom_bond_atom_site_label_2
    _geom_bond_distance
    _geom_bond_site_symmetry_2
    _geom_bond_publ_flag
C1 O1 1.132(2) . ?
C1 Rh1 1.857(2) . ?
C2 O2 1.134(2) . ?
C2 Rh1 1.839(2) . ?
C3 N1 1.491(2) . ?
C3 C4 1.511(3) . ?
C3 H3A 0.99 . ?
C3 H3B 0.99 . ?
C4 H4A 0.98 . ?
C4 H4B 0.98 . ?
C4 H4C 0.98 . ?
C5 N1 1.491(2) . ?
C5 C6 1.510(3) . ?
C5 H5A 0.99 . ?
C5 H5B 0.99 . ?
C6 H6A 0.98 . ?
C6 H6B 0.98 . ?
C6 H6C 0.98 . ?
N1 Rh1 2.1237(15) . ?
N1 H1A 0.869(9) . ?
Cl1 Rh1 2.3404(5) . ?
 
loop_
    _geom_angle_atom_site_label_1
    _geom_angle_atom_site_label_2
    _geom_angle_atom_site_label_3
    _geom_angle
    _geom_angle_site_symmetry_1
    _geom_angle_site_symmetry_3
    _geom_angle_publ_flag
O1 C1 Rh1 178.4(2) . . ?
O2 C2 Rh1 179.23(19) . . ?
N1 C3 C4 111.23(15) . . ?
N1 C3 H3A 109.4 . . ?
C4 C3 H3A 109.4 . . ?
N1 C3 H3B 109.4 . . ?
C4 C3 H3B 109.4 . . ?
H3A C3 H3B 108 . . ?
C3 C4 H4A 109.5 . . ?
C3 C4 H4B 109.5 . . ?
H4A C4 H4B 109.5 . . ?
C3 C4 H4C 109.5 . . ?
H4A C4 H4C 109.5 . . ?
H4B C4 H4C 109.5 . . ?
N1 C5 C6 111.44(15) . . ?
N1 C5 H5A 109.3 . . ?
C6 C5 H5A 109.3 . . ?
N1 C5 H5B 109.3 . . ?
C6 C5 H5B 109.3 . . ?
H5A C5 H5B 108 . . ?
C5 C6 H6A 109.5 . . ?
C5 C6 H6B 109.5 . . ?
H6A C6 H6B 109.5 . . ?
C5 C6 H6C 109.5 . . ?
H6A C6 H6C 109.5 . . ?
H6B C6 H6C 109.5 . . ?
C5 N1 C3 111.26(14) . . ?
C5 N1 Rh1 115.35(11) . . ?
C3 N1 Rh1 114.15(11) . . ?
C5 N1 H1A 103.2(13) . . ?
C3 N1 H1A 104.8(13) . . ?
Rh1 N1 H1A 106.7(14) . . ?
C2 Rh1 C1 91.20(9) . . ?
C2 Rh1 N1 91.87(7) . . ?
C1 Rh1 N1 176.58(8) . . ?
C2 Rh1 Cl1 178.22(6) . . ?
C1 Rh1 Cl1 89.65(7) . . ?
N1 Rh1 Cl1 87.33(4) . . ?

#===END

data_3d

#----------------------------------------------------------------------------#
#                   CHEMICAL INFORMATION                                     #
#----------------------------------------------------------------------------#
 
_chemical_name_systematic
;
 ?
;
_chemical_formula_moiety                'C6 H6 Cl N2 O2 Rh'
_chemical_formula_sum                   'C6 H6 Cl N2 O2 Rh'
_chemical_formula_weight                276.49
_chemical_compound_source               'synthesis as described'
 
#----------------------------------------------------------------------------#
#                   UNIT CELL INFORMATION                                    #
#----------------------------------------------------------------------------#
 
_symmetry_cell_setting                  orthorhombic
_symmetry_space_group_name_H-M          'P b c a'
_symmetry_space_group_name_Hall         '-P 2ac 2ab'
_symmetry_Int_Tables_number             61
loop_
    _symmetry_equiv_pos_as_xyz
'x, y, z'
'-x+1/2, -y, z+1/2'
'x+1/2, -y+1/2, -z'
'-x, y+1/2, -z+1/2'
'-x, -y, -z'
'x-1/2, y, -z-1/2'
'-x-1/2, y-1/2, z'
'x, -y-1/2, z-1/2'
 
_cell_length_a                          16.4534(5)
_cell_length_b                          6.4536(2)
_cell_length_c                          17.3250(5)
_cell_angle_alpha                       90
_cell_angle_beta                        90
_cell_angle_gamma                       90
_cell_volume                            1839.63(10)
_cell_formula_units_Z                   8
_cell_measurement_temperature           180(2)
_cell_measurement_reflns_used           3159
_cell_measurement_theta_min             3.3619
_cell_measurement_theta_max             29.1109
_cell_measurement_wavelength            0.71073
 
#----------------------------------------------------------------------------#
#                   CRYSTAL INFORMATION                                      #
#----------------------------------------------------------------------------#
 
_exptl_crystal_description              plate
_exptl_crystal_colour                   brown
_exptl_crystal_size_max                 0.16
_exptl_crystal_size_mid                 0.08
_exptl_crystal_size_min                 0.04
_exptl_crystal_density_diffrn           1.997
_exptl_crystal_density_method           'not measured'
_exptl_crystal_F_000                    1072
_exptl_special_details
;
 ?
;
 
#----------------------------------------------------------------------------#
#                   ABSORPTION CORRECTION                                    #
#----------------------------------------------------------------------------#
 
_exptl_absorpt_coefficient_mu           2.107
_exptl_absorpt_correction_type          multi-scan
_exptl_absorpt_process_details
;
        CrysAlisPro, Oxford Diffraction Ltd.,
Version 1.171.33.66 (release 28-04-2010 CrysAlis171 .NET)
(compiled Apr 28 2010,14:27:37)
Empirical absorption correction using spherical harmonics,
 implemented in SCALE3 ABSPACK scaling algorithm.
;
_exptl_absorpt_correction_T_min         0.812
_exptl_absorpt_correction_T_max         0.919
 
#----------------------------------------------------------------------------#
#                   DATA COLLECTION                                          #
#----------------------------------------------------------------------------#
 
_diffrn_ambient_temperature             180(2)
_diffrn_radiation_wavelength            0.71073
_diffrn_radiation_type                  MoK\a
_diffrn_radiation_source          'Enhance (Mo) X-ray Source'
_diffrn_radiation_monochromator   'graphite'
_diffrn_measurement_device_type   'Xcalibur, Eos, Gemini ultra'
_diffrn_measurement_method        \w-\f
_diffrn_standards_number          0
_diffrn_standards_interval_count  0
_diffrn_standards_interval_time   0
_diffrn_standards_decay_%         0
_diffrn_radiation_probe                 x-ray
_diffrn_reflns_av_R_equivalents         0.0408
_diffrn_reflns_av_unetI/netI            0.0289
_diffrn_reflns_number                   9624
_diffrn_reflns_limit_h_min              -18
_diffrn_reflns_limit_h_max              19
_diffrn_reflns_limit_k_min              -7
_diffrn_reflns_limit_k_max              7
_diffrn_reflns_limit_l_min              -20
_diffrn_reflns_limit_l_max              20
_diffrn_reflns_theta_min                3.59
_diffrn_reflns_theta_max                25.34
_diffrn_reflns_theta_full               25.34
_diffrn_measured_fraction_theta_full
                                        0.998
_diffrn_measured_fraction_theta_max
                                        0.998
_reflns_number_total                    1685
_reflns_number_gt                       1380
_reflns_threshold_expression            >2sigma(I)
 
#----------------------------------------------------------------------------#
#                   COMPUTER PROGRAMS USED                                   #
#----------------------------------------------------------------------------#

_computing_data_collection              'CrysAlisPro, Oxford Diffraction Ltd.'
_computing_cell_refinement              'CrysAlisPro, Oxford Diffraction Ltd.'
_computing_data_reduction               'CrysAlisPro, Oxford Diffraction Ltd.' 
_computing_structure_solution           'SHELXS-97 (Sheldrick, 1990)'
_computing_structure_refinement         'SHELXL-97 (Sheldrick, 1997)'
_computing_molecular_graphics           'Ortep-3 for Windows (Farrugia, 1997)'
_computing_publication_material
                                   'WinGX publication routines (Farrugia, 1999)'
 
#----------------------------------------------------------------------------#
#                   STRUCTURE SOLUTION
#----------------------------------------------------------------------------#
 
_atom_sites_solution_primary            direct
_atom_sites_solution_secondary          difmap
_atom_sites_solution_hydrogens          geom
 
#----------------------------------------------------------------------------#
#                   REFINEMENT INFORMATION                                   #
#----------------------------------------------------------------------------#
 
_refine_special_details
;
 Refinement of F^2^ against ALL reflections.  The weighted R-factor wR and
 goodness of fit S are based on F^2^, conventional R-factors R are based
 on F, with F set to zero for negative F^2^. The threshold expression of
 F^2^ > 2sigma(F^2^) is used only for calculating R-factors(gt) etc. and is
 not relevant to the choice of reflections for refinement.  R-factors based
 on F^2^ are statistically about twice as large as those based on F, and R-
 factors based on ALL data will be even larger.
;
_refine_ls_structure_factor_coef        Fsqd
_refine_ls_matrix_type                  full
_refine_ls_weighting_scheme             calc
_refine_ls_weighting_details
         'calc w=1/[\s^2^(Fo^2^)+(0.0176P)^2^+0.0000P] where P=(Fo^2^+2Fc^2^)/3'
_refine_ls_hydrogen_treatment           constr
_refine_ls_extinction_method            none
_refine_ls_number_reflns                1685
_refine_ls_number_parameters            110
_refine_ls_number_restraints            0
_refine_ls_R_factor_all                 0.034
_refine_ls_R_factor_gt                  0.0232
_refine_ls_wR_factor_ref                0.0487
_refine_ls_wR_factor_gt                 0.0454
_refine_ls_goodness_of_fit_ref          1.06
_refine_ls_restrained_S_all             1.06
_refine_ls_shift/su_max                 0.003
_refine_ls_shift/su_mean                0
_refine_diff_density_max                0.441
_refine_diff_density_min                -0.442
_refine_diff_density_rms                0.08
 
#----------------------------------------------------------------------------#
#                   ATOMIC TYPES, COORDINATES AND THERMAL PARAMETERS         #
#----------------------------------------------------------------------------#
 
loop_
    _atom_type_symbol
    _atom_type_description
    _atom_type_scat_dispersion_real
    _atom_type_scat_dispersion_imag
    _atom_type_scat_source
C C 0.0033 0.0016 'International Tables Vol C Tables 4.2.6.8 and 6.1.1.4'
H H 0 0 'International Tables Vol C Tables 4.2.6.8 and 6.1.1.4'
N N 0.0061 0.0033 'International Tables Vol C Tables 4.2.6.8 and 6.1.1.4'
O O 0.0106 0.006 'International Tables Vol C Tables 4.2.6.8 and 6.1.1.4'
Cl Cl 0.1484 0.1585 'International Tables Vol C Tables 4.2.6.8 and 6.1.1.4'
Rh Rh -1.1178 0.9187 'International Tables Vol C Tables 4.2.6.8 and 6.1.1.4'
 
loop_
    _atom_site_label
    _atom_site_type_symbol
    _atom_site_fract_x
    _atom_site_fract_y
    _atom_site_fract_z
    _atom_site_U_iso_or_equiv
    _atom_site_adp_type
    _atom_site_occupancy
    _atom_site_symmetry_multiplicity
    _atom_site_calc_flag
    _atom_site_refinement_flags
    _atom_site_disorder_assembly
    _atom_site_disorder_group
C1 C 0.7916(2) 0.2064(4) 0.4091(2) 0.0278(7) Uani 1 1 d . . .
C2 C 0.8431(2) 0.2136(4) 0.26673(18) 0.0262(7) Uani 1 1 d . . .
C3 C 0.60615(19) 0.2066(4) 0.19140(17) 0.0248(7) Uani 1 1 d . . .
H3 H 0.568 0.1599 0.2288 0.03 Uiso 1 1 calc R . .
C4 C 0.6578(2) 0.3096(5) 0.08224(18) 0.0308(8) Uani 1 1 d . . .
H4 H 0.6636 0.3487 0.0297 0.037 Uiso 1 1 calc R . .
C5 C 0.7165(2) 0.3095(4) 0.13646(17) 0.0286(7) Uani 1 1 d . . .
H5 H 0.7716 0.348 0.1284 0.034 Uiso 1 1 calc R . .
C6 C 0.5085(2) 0.2242(5) 0.08122(18) 0.0361(8) Uani 1 1 d . . .
H6A H 0.4807 0.1014 0.1015 0.054 Uiso 1 1 calc R . .
H6B H 0.515 0.2107 0.0252 0.054 Uiso 1 1 calc R . .
H6C H 0.4763 0.348 0.0927 0.054 Uiso 1 1 calc R . .
N1 N 0.68365(15) 0.2442(3) 0.20583(14) 0.0219(6) Uani 1 1 d . . .
N2 N 0.58846(16) 0.2429(3) 0.11730(14) 0.0259(6) Uani 1 1 d . . .
O1 O 0.82002(14) 0.1996(4) 0.46830(13) 0.0407(6) Uani 1 1 d . . .
O2 O 0.90563(15) 0.2082(3) 0.23939(13) 0.0403(6) Uani 1 1 d . . .
Cl1 Cl 0.61381(5) 0.21944(11) 0.37541(4) 0.02941(19) Uani 1 1 d . . .
Rh1 Rh 0.742221(14) 0.22122(3) 0.312922(13) 0.02186(9) Uani 1 1 d . . .
 
loop_
    _atom_site_aniso_label
    _atom_site_aniso_U_11
    _atom_site_aniso_U_22
    _atom_site_aniso_U_33
    _atom_site_aniso_U_23
    _atom_site_aniso_U_13
    _atom_site_aniso_U_12
C1 0.0202(18) 0.0290(17) 0.034(2) -0.0008(15) 0.0047(16) 0.0016(13)
C2 0.030(2) 0.0233(16) 0.0254(17) -0.0013(14) -0.0075(16) -0.0022(14)
C3 0.0242(18) 0.0265(16) 0.0237(17) 0.0000(14) 0.0011(14) -0.0011(12)
C4 0.031(2) 0.0414(18) 0.0199(16) 0.0026(15) 0.0019(15) -0.0032(15)
C5 0.0251(19) 0.0342(18) 0.0266(18) 0.0018(15) 0.0036(15) -0.0032(13)
C6 0.026(2) 0.053(2) 0.0290(19) -0.0022(16) -0.0069(15) -0.0033(16)
N1 0.0211(15) 0.0217(13) 0.0228(14) -0.0023(10) -0.0006(11) -0.0002(10)
N2 0.0240(16) 0.0315(15) 0.0221(14) -0.0024(11) -0.0031(12) -0.0006(11)
O1 0.0318(15) 0.0666(16) 0.0237(13) -0.0006(12) -0.0050(12) 0.0018(12)
O2 0.0259(14) 0.0528(14) 0.0423(15) 0.0001(12) 0.0061(13) -0.0014(11)
Cl1 0.0246(5) 0.0409(4) 0.0227(4) -0.0002(3) 0.0037(3) 0.0003(3)
Rh1 0.02025(15) 0.02418(14) 0.02115(14) -0.00093(10) -0.00040(11) 0.00000(9)
 
 
#----------------------------------------------------------------------------#
#                   MOLECULAR GEOMETRY                                       #
#----------------------------------------------------------------------------#
 
_geom_special_details
;
 All esds (except the esd in the dihedral angle between two l.s. planes)
 are estimated using the full covariance matrix.  The cell esds are taken
 into account individually in the estimation of esds in distances, angles
 and torsion angles; correlations between esds in cell parameters are only
 used when they are defined by crystal symmetry.  An approximate (isotropic)
 treatment of cell esds is used for estimating esds involving l.s. planes.
;
loop_
    _geom_bond_atom_site_label_1
    _geom_bond_atom_site_label_2
    _geom_bond_distance
    _geom_bond_site_symmetry_2
    _geom_bond_publ_flag
C1 O1 1.127(4) . ?
C1 Rh1 1.857(4) . ?
C2 O2 1.134(4) . ?
C2 Rh1 1.843(4) . ?
C3 N1 1.322(4) . ?
C3 N2 1.337(4) . ?
C3 H3 0.95 . ?
C4 C5 1.348(4) . ?
C4 N2 1.362(4) . ?
C4 H4 0.95 . ?
C5 N1 1.384(4) . ?
C5 H5 0.95 . ?
C6 N2 1.461(4) . ?
C6 H6A 0.98 . ?
C6 H6B 0.98 . ?
C6 H6C 0.98 . ?
N1 Rh1 2.096(2) . ?
Cl1 Rh1 2.3740(8) . ?
 
loop_
    _geom_angle_atom_site_label_1
    _geom_angle_atom_site_label_2
    _geom_angle_atom_site_label_3
    _geom_angle
    _geom_angle_site_symmetry_1
    _geom_angle_site_symmetry_3
    _geom_angle_publ_flag
O1 C1 Rh1 178.3(3) . . ?
O2 C2 Rh1 178.9(3) . . ?
N1 C3 N2 111.1(3) . . ?
N1 C3 H3 124.5 . . ?
N2 C3 H3 124.5 . . ?
C5 C4 N2 106.8(3) . . ?
C5 C4 H4 126.6 . . ?
N2 C4 H4 126.6 . . ?
C4 C5 N1 109.0(3) . . ?
C4 C5 H5 125.5 . . ?
N1 C5 H5 125.5 . . ?
N2 C6 H6A 109.5 . . ?
N2 C6 H6B 109.5 . . ?
H6A C6 H6B 109.5 . . ?
N2 C6 H6C 109.5 . . ?
H6A C6 H6C 109.5 . . ?
H6B C6 H6C 109.5 . . ?
C3 N1 C5 105.6(2) . . ?
C3 N1 Rh1 126.7(2) . . ?
C5 N1 Rh1 127.6(2) . . ?
C3 N2 C4 107.5(3) . . ?
C3 N2 C6 126.3(3) . . ?
C4 N2 C6 126.1(3) . . ?
C2 Rh1 C1 89.67(13) . . ?
C2 Rh1 N1 91.80(11) . . ?
C1 Rh1 N1 178.19(11) . . ?
C2 Rh1 Cl1 177.72(9) . . ?
C1 Rh1 Cl1 88.85(10) . . ?
N1 Rh1 Cl1 89.70(7) . . ?
 
#===END

data_3e

#----------------------------------------------------------------------------#
#                   CHEMICAL INFORMATION                                     #
#----------------------------------------------------------------------------#
 
_chemical_name_systematic
;
 ?
;
_chemical_formula_moiety                'C5 H4 Cl N2 O2 Rh'
_chemical_formula_sum                   'C5 H4 Cl N2 O2 Rh'
_chemical_formula_weight                262.46
_chemical_compound_source               'synthesis as described'
 
#----------------------------------------------------------------------------#
#                   UNIT CELL INFORMATION                                    #
#----------------------------------------------------------------------------#
 
_symmetry_cell_setting                  monoclinic
_symmetry_space_group_name_H-M          'P 21/c'
_symmetry_space_group_name_Hall         '-P 2ybc'
_symmetry_Int_Tables_number             14
loop_
    _symmetry_equiv_pos_as_xyz
'x, y, z'
'-x, y+1/2, -z+1/2'
'-x, -y, -z'
'x, -y-1/2, z-1/2'
 
_cell_length_a                          10.4119(11)
_cell_length_b                          6.7619(7)
_cell_length_c                          13.9762(11)
_cell_angle_alpha                       90
_cell_angle_beta                        125.835(5)
_cell_angle_gamma                       90
_cell_volume                            797.72(14)
_cell_formula_units_Z                   4
_cell_measurement_temperature           180(2)
_cell_measurement_reflns_used           7403
_cell_measurement_theta_min             2.41
_cell_measurement_theta_max             30.52
_cell_measurement_wavelength            0.71073
 
#----------------------------------------------------------------------------#
#                   CRYSTAL INFORMATION                                      #
#----------------------------------------------------------------------------#
 
_exptl_crystal_description              plate
_exptl_crystal_colour                   orange
_exptl_crystal_size_max                 0.24
_exptl_crystal_size_mid                 0.14
_exptl_crystal_size_min                 0.1
_exptl_crystal_density_diffrn           2.185
_exptl_crystal_density_method           'not measured'
_exptl_crystal_F_000                    504
_exptl_special_details
;
 ?
;
 
#----------------------------------------------------------------------------#
#                   ABSORPTION CORRECTION                                    #
#----------------------------------------------------------------------------#
 
_exptl_absorpt_coefficient_mu           2.423
_exptl_absorpt_correction_type          multi-scan
_exptl_absorpt_process_details
;
        [c.f. r.h. blessing, acta cryst. (1995), a51, 33-38]
;
_exptl_absorpt_correction_T_min         0.670
_exptl_absorpt_correction_T_max         0.785
 
#----------------------------------------------------------------------------#
#                   DATA COLLECTION                                          #
#----------------------------------------------------------------------------#
 
_diffrn_ambient_temperature             180(2)
_diffrn_radiation_wavelength            0.71073
_diffrn_radiation_type                  MoK\a
_diffrn_radiation_source          'fine-focus sealed tube'
_diffrn_radiation_monochromator   graphite
_diffrn_measurement_device_type   'Bruker Kappa APEX II'
_diffrn_measurement_method        \w-\f
_diffrn_standards_number          0
_diffrn_standards_interval_count  0
_diffrn_standards_interval_time   0
_diffrn_standards_decay_%         0
_diffrn_radiation_probe                 x-ray
_diffrn_reflns_av_R_equivalents         0.0185
_diffrn_reflns_av_unetI/netI            0.0144
_diffrn_reflns_number                   10111
_diffrn_reflns_limit_h_min              -14
_diffrn_reflns_limit_h_max              14
_diffrn_reflns_limit_k_min              -9
_diffrn_reflns_limit_k_max              9
_diffrn_reflns_limit_l_min              -19
_diffrn_reflns_limit_l_max              19
_diffrn_reflns_theta_min                2.93
_diffrn_reflns_theta_max                30.52
_diffrn_reflns_theta_full               30.52
_diffrn_measured_fraction_theta_full
                                        1
_diffrn_measured_fraction_theta_max
                                        1
_reflns_number_total                    2445
_reflns_number_gt                       2302
_reflns_threshold_expression            >2sigma(I)
 
#----------------------------------------------------------------------------#
#                   COMPUTER PROGRAMS USED                                   #
#----------------------------------------------------------------------------#
 
_computing_data_collection              'Bruker SMART'
_computing_cell_refinement              'Bruker SMART'
_computing_data_reduction               'Bruker SAINT' 
_computing_structure_solution           'SHELXS-97 (Sheldrick, 1990)'
_computing_structure_refinement         'SHELXL-97 (Sheldrick, 1997)'
_computing_molecular_graphics           'Ortep-3 for Windows (Farrugia, 1997)'
_computing_publication_material
                                   'WinGX publication routines (Farrugia, 1999)'
 
#----------------------------------------------------------------------------#
#                   STRUCTURE SOLUTION
#----------------------------------------------------------------------------#
 
_atom_sites_solution_primary            direct
_atom_sites_solution_secondary          difmap
_atom_sites_solution_hydrogens          geom
 
#----------------------------------------------------------------------------#
#                   REFINEMENT INFORMATION                                   #
#----------------------------------------------------------------------------#
 
_refine_special_details
;
 Refinement of F^2^ against ALL reflections.  The weighted R-factor wR and
 goodness of fit S are based on F^2^, conventional R-factors R are based
 on F, with F set to zero for negative F^2^. The threshold expression of
 F^2^ > 2sigma(F^2^) is used only for calculating R-factors(gt) etc. and is
 not relevant to the choice of reflections for refinement.  R-factors based
 on F^2^ are statistically about twice as large as those based on F, and R-
 factors based on ALL data will be even larger.
;
_refine_ls_structure_factor_coef        Fsqd
_refine_ls_matrix_type                  full
_refine_ls_weighting_scheme             calc
_refine_ls_weighting_details
         'calc w=1/[\s^2^(Fo^2^)+(0.0178P)^2^+0.1784P] where P=(Fo^2^+2Fc^2^)/3'
_refine_ls_hydrogen_treatment           mixed
_refine_ls_extinction_method            SHELXL
_refine_ls_extinction_expression
                                    Fc^*^=kFc[1+0.001xFc^2^\l^3^/sin(2\q)]^-1/4^
_refine_ls_extinction_coef              0.0157(4)
_refine_ls_number_reflns                2445
_refine_ls_number_parameters            104
_refine_ls_number_restraints            1
_refine_ls_R_factor_all                 0.0149
_refine_ls_R_factor_gt                  0.0134
_refine_ls_wR_factor_ref                0.0363
_refine_ls_wR_factor_gt                 0.0353
_refine_ls_goodness_of_fit_ref          1.074
_refine_ls_restrained_S_all             1.074
_refine_ls_shift/su_max                 0.003
_refine_ls_shift/su_mean                0
_refine_diff_density_max                0.4
_refine_diff_density_min                -0.354
_refine_diff_density_rms                0.066
 
#----------------------------------------------------------------------------#
#                   ATOMIC TYPES, COORDINATES AND THERMAL PARAMETERS         #
#----------------------------------------------------------------------------#
 
loop_
    _atom_type_symbol
    _atom_type_description
    _atom_type_scat_dispersion_real
    _atom_type_scat_dispersion_imag
    _atom_type_scat_source
C C 0.0033 0.0016 'International Tables Vol C Tables 4.2.6.8 and 6.1.1.4'
H H 0 0 'International Tables Vol C Tables 4.2.6.8 and 6.1.1.4'
Cl Cl 0.1484 0.1585 'International Tables Vol C Tables 4.2.6.8 and 6.1.1.4'
N N 0.0061 0.0033 'International Tables Vol C Tables 4.2.6.8 and 6.1.1.4'
O O 0.0106 0.006 'International Tables Vol C Tables 4.2.6.8 and 6.1.1.4'
Rh Rh -1.1178 0.9187 'International Tables Vol C Tables 4.2.6.8 and 6.1.1.4'
 
loop_
    _atom_site_label
    _atom_site_type_symbol
    _atom_site_fract_x
    _atom_site_fract_y
    _atom_site_fract_z
    _atom_site_U_iso_or_equiv
    _atom_site_adp_type
    _atom_site_occupancy
    _atom_site_symmetry_multiplicity
    _atom_site_calc_flag
    _atom_site_refinement_flags
    _atom_site_disorder_assembly
    _atom_site_disorder_group
Rh1 Rh 1.008265(10) 0.386751(12) 0.744981(7) 0.02259(4) Uani 1 1 d . . .
Cl1 Cl 1.13284(4) 0.39360(4) 0.95084(3) 0.02867(7) Uani 1 1 d . . .
O2 O 0.85522(15) 0.39898(14) 0.48615(10) 0.0434(3) Uani 1 1 d . . .
O1 O 1.32835(15) 0.37520(16) 0.79552(15) 0.0581(4) Uani 1 1 d . . .
N1 N 0.78633(12) 0.38176(12) 0.71423(9) 0.02287(19) Uani 1 1 d . . .
N2 N 0.76730(12) 0.41946(15) 0.79948(9) 0.0270(2) Uani 1 1 d D . .
H2A H 0.8517(14) 0.439(2) 0.8701(9) 0.032 Uiso 1 1 d D . .
C5 C 0.64081(15) 0.34298(19) 0.61789(11) 0.0322(3) Uani 1 1 d . . .
H5 H 0.6166 0.3108 0.5428 0.039 Uiso 1 1 calc R . .
C4 C 0.53012(15) 0.35619(19) 0.64277(13) 0.0367(3) Uani 1 1 d . . .
H4 H 0.419 0.3355 0.5899 0.044 Uiso 1 1 calc R . .
C3 C 0.61529(15) 0.4054(2) 0.75960(13) 0.0346(3) Uani 1 1 d . . .
H3 H 0.5742 0.4259 0.8042 0.042 Uiso 1 1 calc R . .
C2 C 0.91402(18) 0.39272(16) 0.58434(13) 0.0299(3) Uani 1 1 d . . .
C1 C 1.20587(19) 0.38190(17) 0.77449(16) 0.0361(3) Uani 1 1 d . . .
 
loop_
    _atom_site_aniso_label
    _atom_site_aniso_U_11
    _atom_site_aniso_U_22
    _atom_site_aniso_U_33
    _atom_site_aniso_U_23
    _atom_site_aniso_U_13
    _atom_site_aniso_U_12
Rh1 0.02217(6) 0.02134(6) 0.02779(6) -0.00167(3) 0.01661(4) -0.00078(3)
Cl1 0.02191(13) 0.03138(14) 0.02481(13) -0.00092(9) 0.00925(11) 0.00338(9)
O2 0.0659(8) 0.0361(5) 0.0370(5) -0.0037(4) 0.0350(6) -0.0030(4)
O1 0.0423(7) 0.0518(7) 0.0996(11) -0.0167(6) 0.0524(8) -0.0080(4)
N1 0.0197(4) 0.0255(5) 0.0220(4) 0.0022(3) 0.0114(4) 0.0004(3)
N2 0.0198(4) 0.0377(5) 0.0237(4) 0.0028(4) 0.0128(4) 0.0001(4)
C5 0.0249(6) 0.0368(6) 0.0255(5) 0.0005(5) 0.0094(5) -0.0030(5)
C4 0.0188(5) 0.0423(7) 0.0378(7) 0.0077(5) 0.0103(5) -0.0011(4)
C3 0.0233(6) 0.0437(7) 0.0399(7) 0.0087(5) 0.0203(5) 0.0025(5)
C2 0.0390(7) 0.0230(5) 0.0380(7) -0.0029(4) 0.0283(6) -0.0019(4)
C1 0.0359(7) 0.0276(6) 0.0564(9) -0.0082(5) 0.0335(7) -0.0047(4)
 
 
#----------------------------------------------------------------------------#
#                   MOLECULAR GEOMETRY                                       #
#----------------------------------------------------------------------------#
 
_geom_special_details
;
 All esds (except the esd in the dihedral angle between two l.s. planes)
 are estimated using the full covariance matrix.  The cell esds are taken
 into account individually in the estimation of esds in distances, angles
 and torsion angles; correlations between esds in cell parameters are only
 used when they are defined by crystal symmetry.  An approximate (isotropic)
 treatment of cell esds is used for estimating esds involving l.s. planes.
;
loop_
    _geom_bond_atom_site_label_1
    _geom_bond_atom_site_label_2
    _geom_bond_distance
    _geom_bond_site_symmetry_2
    _geom_bond_publ_flag
Rh1 C1 1.8468(15) . ?
Rh1 C2 1.8508(14) . ?
Rh1 N1 2.0887(11) . ?
Rh1 Cl1 2.3649(4) . ?
O2 C2 1.1296(18) . ?
O1 C1 1.1295(19) . ?
N1 C5 1.3373(16) . ?
N1 N2 1.3417(14) . ?
N2 C3 1.3386(16) . ?
N2 H2A 0.865(9) . ?
C5 C4 1.388(2) . ?
C5 H5 0.95 . ?
C4 C3 1.367(2) . ?
C4 H4 0.95 . ?
C3 H3 0.95 . ?
 
loop_
    _geom_angle_atom_site_label_1
    _geom_angle_atom_site_label_2
    _geom_angle_atom_site_label_3
    _geom_angle
    _geom_angle_site_symmetry_1
    _geom_angle_site_symmetry_3
    _geom_angle_publ_flag
C1 Rh1 C2 90.08(7) . . ?
C1 Rh1 N1 177.89(5) . . ?
C2 Rh1 N1 90.79(5) . . ?
C1 Rh1 Cl1 89.02(6) . . ?
C2 Rh1 Cl1 177.45(4) . . ?
N1 Rh1 Cl1 90.20(3) . . ?
C5 N1 N2 105.19(11) . . ?
C5 N1 Rh1 132.47(9) . . ?
N2 N1 Rh1 122.34(8) . . ?
C3 N2 N1 111.72(11) . . ?
C3 N2 H2A 130.5(10) . . ?
N1 N2 H2A 117.6(10) . . ?
N1 C5 C4 110.65(12) . . ?
N1 C5 H5 124.7 . . ?
C4 C5 H5 124.7 . . ?
C3 C4 C5 105.18(11) . . ?
C3 C4 H4 127.4 . . ?
C5 C4 H4 127.4 . . ?
N2 C3 C4 107.26(13) . . ?
N2 C3 H3 126.4 . . ?
C4 C3 H3 126.4 . . ?
O2 C2 Rh1 178.91(12) . . ?
O1 C1 Rh1 177.82(17) . . ?

#===END

data_3f

#----------------------------------------------------------------------------#
#                   CHEMICAL INFORMATION                                     #
#----------------------------------------------------------------------------#
 
_chemical_name_systematic
;
 ?
;
_chemical_formula_moiety                'C6 H6 Cl N2 O2 Rh'
_chemical_formula_sum                   'C6 H6 Cl N2 O2 Rh'
_chemical_formula_weight                276.49
_chemical_compound_source               'synthesis as described'
 
#----------------------------------------------------------------------------#
#                   UNIT CELL INFORMATION                                    #
#----------------------------------------------------------------------------#
 
_symmetry_cell_setting                  monoclinic
_symmetry_space_group_name_H-M          'C 2/c'
_symmetry_space_group_name_Hall         '-C 2yc'
_symmetry_Int_Tables_number             15
loop_
    _symmetry_equiv_pos_as_xyz
'x, y, z'
'-x, y, -z+1/2'
'x+1/2, y+1/2, z'
'-x+1/2, y+1/2, -z+1/2'
'-x, -y, -z'
'x, -y, z-1/2'
'-x+1/2, -y+1/2, -z'
'x+1/2, -y+1/2, z-1/2'
 
_cell_length_a                          9.3891(10)
_cell_length_b                          13.0923(16)
_cell_length_c                          14.9814(18)
_cell_angle_alpha                       90
_cell_angle_beta                        95.963(6)
_cell_angle_gamma                       90
_cell_volume                            1831.6(4)
_cell_formula_units_Z                   8
_cell_measurement_temperature           180(2)
_cell_measurement_reflns_used           5164
_cell_measurement_theta_min             2.68
_cell_measurement_theta_max             30.42
_cell_measurement_wavelength            0.71073
 
#----------------------------------------------------------------------------#
#                   CRYSTAL INFORMATION                                      #
#----------------------------------------------------------------------------#
 
_exptl_crystal_description              plate
_exptl_crystal_colour                   yellow
_exptl_crystal_size_max                 0.2
_exptl_crystal_size_mid                 0.08
_exptl_crystal_size_min                 0.04
_exptl_crystal_density_diffrn           2.005
_exptl_crystal_density_method           'not measured'
_exptl_crystal_F_000                    1072
_exptl_special_details
;
 ?
;
 
#----------------------------------------------------------------------------#
#                   ABSORPTION CORRECTION                                    #
#----------------------------------------------------------------------------#
 
_exptl_absorpt_coefficient_mu           2.116
_exptl_absorpt_correction_type          multi-scan
_exptl_absorpt_process_details
;
        [c.f. r.h. blessing, acta cryst. (1995), a51, 33-38]
;
_exptl_absorpt_correction_T_min         0.8160
_exptl_absorpt_correction_T_max         0.9201
 
#----------------------------------------------------------------------------#
#                   DATA COLLECTION                                          #
#----------------------------------------------------------------------------#
 
_diffrn_ambient_temperature             180(2)
_diffrn_radiation_wavelength            0.71073
_diffrn_radiation_type                  MoK\a
_diffrn_radiation_source          'fine-focus sealed tube'
_diffrn_radiation_monochromator   graphite
_diffrn_measurement_device_type   'Bruker Kappa APEX II'
_diffrn_measurement_method        \w-\f
_diffrn_standards_number          0
_diffrn_standards_interval_count  0
_diffrn_standards_interval_time   0
_diffrn_standards_decay_%         0
_diffrn_radiation_probe                 x-ray
_diffrn_reflns_av_R_equivalents         0.0248
_diffrn_reflns_av_unetI/netI            0.022
_diffrn_reflns_number                   12171
_diffrn_reflns_limit_h_min              -13
_diffrn_reflns_limit_h_max              13
_diffrn_reflns_limit_k_min              -18
_diffrn_reflns_limit_k_max              18
_diffrn_reflns_limit_l_min              -19
_diffrn_reflns_limit_l_max              21
_diffrn_reflns_theta_min                2.68
_diffrn_reflns_theta_max                30.52
_diffrn_reflns_theta_full               30.52
_diffrn_measured_fraction_theta_full
                                        0.998
_diffrn_measured_fraction_theta_max
                                        0.998
_reflns_number_total                    2808
_reflns_number_gt                       2360
_reflns_threshold_expression            >2sigma(I)
 
#----------------------------------------------------------------------------#
#                   COMPUTER PROGRAMS USED                                   #
#----------------------------------------------------------------------------#

_computing_data_collection              'Bruker SMART'
_computing_cell_refinement              'Bruker SMART'
_computing_data_reduction               'Bruker SAINT' 
_computing_structure_solution           'SHELXS-97 (Sheldrick, 1990)'
_computing_structure_refinement         'SHELXL-97 (Sheldrick, 1997)'
_computing_molecular_graphics           'Ortep-3 for Windows (Farrugia, 1997)'
_computing_publication_material
                                   'WinGX publication routines (Farrugia, 1999)'
 
#----------------------------------------------------------------------------#
#                   STRUCTURE SOLUTION
#----------------------------------------------------------------------------#
 
_atom_sites_solution_primary            direct
_atom_sites_solution_secondary          difmap
_atom_sites_solution_hydrogens          geom
 
#----------------------------------------------------------------------------#
#                   REFINEMENT INFORMATION                                   #
#----------------------------------------------------------------------------#
 
_refine_special_details
;
 Refinement of F^2^ against ALL reflections.  The weighted R-factor wR and
 goodness of fit S are based on F^2^, conventional R-factors R are based
 on F, with F set to zero for negative F^2^. The threshold expression of
 F^2^ > 2sigma(F^2^) is used only for calculating R-factors(gt) etc. and is
 not relevant to the choice of reflections for refinement.  R-factors based
 on F^2^ are statistically about twice as large as those based on F, and R-
 factors based on ALL data will be even larger.
;
_refine_ls_structure_factor_coef        Fsqd
_refine_ls_matrix_type                  full
_refine_ls_weighting_scheme             calc
_refine_ls_weighting_details
         'calc w=1/[\s^2^(Fo^2^)+(0.0185P)^2^+1.7581P] where P=(Fo^2^+2Fc^2^)/3'
_refine_ls_hydrogen_treatment           constr
_refine_ls_extinction_method            none
_refine_ls_number_reflns                2808
_refine_ls_number_parameters            110
_refine_ls_number_restraints            0
_refine_ls_R_factor_all                 0.0301
_refine_ls_R_factor_gt                  0.0209
_refine_ls_wR_factor_ref                0.0461
_refine_ls_wR_factor_gt                 0.0435
_refine_ls_goodness_of_fit_ref          1.017
_refine_ls_restrained_S_all             1.017
_refine_ls_shift/su_max                 0.002
_refine_ls_shift/su_mean                0
_refine_diff_density_max                0.516
_refine_diff_density_min                -0.653
_refine_diff_density_rms                0.074
 
#----------------------------------------------------------------------------#
#                   ATOMIC TYPES, COORDINATES AND THERMAL PARAMETERS         #
#----------------------------------------------------------------------------#
 
loop_
    _atom_type_symbol
    _atom_type_description
    _atom_type_scat_dispersion_real
    _atom_type_scat_dispersion_imag
    _atom_type_scat_source
C C 0.0033 0.0016 'International Tables Vol C Tables 4.2.6.8 and 6.1.1.4'
H H 0 0 'International Tables Vol C Tables 4.2.6.8 and 6.1.1.4'
N N 0.0061 0.0033 'International Tables Vol C Tables 4.2.6.8 and 6.1.1.4'
O O 0.0106 0.006 'International Tables Vol C Tables 4.2.6.8 and 6.1.1.4'
Cl Cl 0.1484 0.1585 'International Tables Vol C Tables 4.2.6.8 and 6.1.1.4'
Rh Rh -1.1178 0.9187 'International Tables Vol C Tables 4.2.6.8 and 6.1.1.4'
 
loop_
    _atom_site_label
    _atom_site_type_symbol
    _atom_site_fract_x
    _atom_site_fract_y
    _atom_site_fract_z
    _atom_site_U_iso_or_equiv
    _atom_site_adp_type
    _atom_site_occupancy
    _atom_site_symmetry_multiplicity
    _atom_site_calc_flag
    _atom_site_refinement_flags
    _atom_site_disorder_assembly
    _atom_site_disorder_group
C1 C 0.6535(2) 0.37365(15) 0.70021(14) 0.0320(4) Uani 1 1 d . . .
C2 C 0.7767(2) 0.20501(15) 0.75958(15) 0.0356(4) Uani 1 1 d . . .
C3 C 0.6344(2) -0.06986(15) 0.57963(13) 0.0319(4) Uani 1 1 d . . .
H3 H 0.6792 -0.1259 0.5535 0.038 Uiso 1 1 calc R . .
C4 C 0.5012(2) -0.07008(15) 0.60815(14) 0.0329(4) Uani 1 1 d . . .
H4 H 0.4356 -0.1254 0.6068 0.04 Uiso 1 1 calc R . .
C5 C 0.4825(2) 0.02817(15) 0.63964(14) 0.0328(4) Uani 1 1 d . . .
H5 H 0.3986 0.0517 0.6636 0.039 Uiso 1 1 calc R . .
C6 C 0.8278(2) 0.06065(18) 0.57147(18) 0.0453(6) Uani 1 1 d . . .
H6A H 0.8755 0.0069 0.5401 0.068 Uiso 1 1 calc R . .
H6B H 0.888 0.08 0.6262 0.068 Uiso 1 1 calc R . .
H6C H 0.8121 0.1204 0.5322 0.068 Uiso 1 1 calc R . .
N1 N 0.59807(16) 0.08503(11) 0.63178(10) 0.0258(3) Uani 1 1 d . . .
N2 N 0.69133(17) 0.02332(11) 0.59485(11) 0.0273(3) Uani 1 1 d . . .
O1 O 0.66471(18) 0.45790(11) 0.71593(12) 0.0485(4) Uani 1 1 d . . .
O2 O 0.86660(18) 0.18826(14) 0.81389(12) 0.0546(5) Uani 1 1 d . . .
Cl1 Cl 0.45233(6) 0.28411(4) 0.55916(4) 0.03640(11) Uani 1 1 d . . .
Rh1 Rh 0.631661(15) 0.237290(10) 0.671220(10) 0.02502(5) Uani 1 1 d . . .
 
loop_
    _atom_site_aniso_label
    _atom_site_aniso_U_11
    _atom_site_aniso_U_22
    _atom_site_aniso_U_33
    _atom_site_aniso_U_23
    _atom_site_aniso_U_13
    _atom_site_aniso_U_12
C1 0.0295(10) 0.0284(10) 0.0380(11) -0.0033(8) 0.0021(8) -0.0021(7)
C2 0.0376(11) 0.0233(9) 0.0446(12) -0.0056(8) -0.0011(9) -0.0006(8)
C3 0.0373(10) 0.0214(9) 0.0359(11) -0.0043(7) -0.0010(8) 0.0042(7)
C4 0.0379(10) 0.0237(9) 0.0363(11) -0.0010(8) -0.0003(8) -0.0054(8)
C5 0.0298(10) 0.0293(10) 0.0402(11) -0.0055(8) 0.0078(8) -0.0033(8)
C6 0.0352(11) 0.0394(12) 0.0645(16) -0.0095(11) 0.0203(11) -0.0031(9)
N1 0.0256(7) 0.0217(7) 0.0299(8) -0.0026(6) 0.0027(6) 0.0008(6)
N2 0.0258(8) 0.0232(7) 0.0329(9) -0.0024(6) 0.0029(6) 0.0031(6)
O1 0.0520(10) 0.0266(8) 0.0656(11) -0.0096(7) -0.0002(8) -0.0035(7)
O2 0.0561(11) 0.0401(9) 0.0611(11) -0.0078(8) -0.0245(9) 0.0078(8)
Cl1 0.0382(3) 0.0273(2) 0.0416(3) -0.00111(19) -0.0064(2) 0.00502(19)
Rh1 0.02518(7) 0.01960(7) 0.03025(8) -0.00313(6) 0.00273(5) -0.00100(5)
 
 
#----------------------------------------------------------------------------#
#                   MOLECULAR GEOMETRY                                       #
#----------------------------------------------------------------------------#
 
_geom_special_details
;
 All esds (except the esd in the dihedral angle between two l.s. planes)
 are estimated using the full covariance matrix.  The cell esds are taken
 into account individually in the estimation of esds in distances, angles
 and torsion angles; correlations between esds in cell parameters are only
 used when they are defined by crystal symmetry.  An approximate (isotropic)
 treatment of cell esds is used for estimating esds involving l.s. planes.
;
loop_
    _geom_bond_atom_site_label_1
    _geom_bond_atom_site_label_2
    _geom_bond_distance
    _geom_bond_site_symmetry_2
    _geom_bond_publ_flag
C1 O1 1.131(2) . ?
C1 Rh1 1.844(2) . ?
C2 O2 1.132(3) . ?
C2 Rh1 1.847(2) . ?
C3 N2 1.342(2) . ?
C3 C4 1.363(3) . ?
C3 H3 0.95 . ?
C4 C5 1.388(3) . ?
C4 H4 0.95 . ?
C5 N1 1.331(2) . ?
C5 H5 0.95 . ?
C6 N2 1.448(2) . ?
C6 H6A 0.98 . ?
C6 H6B 0.98 . ?
C6 H6C 0.98 . ?
N1 N2 1.351(2) . ?
N1 Rh1 2.0937(15) . ?
Cl1 Rh1 2.3328(6) . ?
 
loop_
    _geom_angle_atom_site_label_1
    _geom_angle_atom_site_label_2
    _geom_angle_atom_site_label_3
    _geom_angle
    _geom_angle_site_symmetry_1
    _geom_angle_site_symmetry_3
    _geom_angle_publ_flag
O1 C1 Rh1 178.2(2) . . ?
O2 C2 Rh1 177.93(19) . . ?
N2 C3 C4 108.10(17) . . ?
N2 C3 H3 125.9 . . ?
C4 C3 H3 125.9 . . ?
C3 C4 C5 104.92(17) . . ?
C3 C4 H4 127.5 . . ?
C5 C4 H4 127.5 . . ?
N1 C5 C4 110.80(17) . . ?
N1 C5 H5 124.6 . . ?
C4 C5 H5 124.6 . . ?
N2 C6 H6A 109.5 . . ?
N2 C6 H6B 109.5 . . ?
H6A C6 H6B 109.5 . . ?
N2 C6 H6C 109.5 . . ?
H6A C6 H6C 109.5 . . ?
H6B C6 H6C 109.5 . . ?
C5 N1 N2 105.71(15) . . ?
C5 N1 Rh1 127.43(12) . . ?
N2 N1 Rh1 126.85(11) . . ?
C3 N2 N1 110.46(15) . . ?
C3 N2 C6 127.77(17) . . ?
N1 N2 C6 121.64(16) . . ?
C1 Rh1 C2 89.83(9) . . ?
C1 Rh1 N1 176.56(8) . . ?
C2 Rh1 N1 93.59(7) . . ?
C1 Rh1 Cl1 88.25(7) . . ?
C2 Rh1 Cl1 177.85(6) . . ?
N1 Rh1 Cl1 88.32(4) . . ?

#===END

data_4a

#----------------------------------------------------------------------------#
#                   CHEMICAL INFORMATION                                     #
#----------------------------------------------------------------------------#
 
_chemical_name_systematic
;
 ?
;
_chemical_formula_moiety                'C6 H11 I N O2 Rh'
_chemical_formula_sum                   'C6 H11 I N O2 Rh'
_chemical_formula_weight                358.97
_chemical_compound_source               'synthesis as described'
 
#----------------------------------------------------------------------------#
#                   UNIT CELL INFORMATION                                    #
#----------------------------------------------------------------------------#
 
_symmetry_cell_setting                  monoclinic
_symmetry_space_group_name_H-M          'P 1 21/c 1'
_symmetry_space_group_name_Hall         '-P 2ybc'
_symmetry_Int_Tables_number             14
loop_
    _symmetry_equiv_pos_as_xyz
'x, y, z'
'-x, y+1/2, -z+1/2'
'-x, -y, -z'
'x, -y-1/2, z-1/2'
 
_cell_length_a                          7.928(5)
_cell_length_b                          12.626(5)
_cell_length_c                          12.203(5)
_cell_angle_alpha                       90
_cell_angle_beta                        117.84(3)
_cell_angle_gamma                       90
_cell_volume                            1080.1(10)
_cell_formula_units_Z                   4
_cell_measurement_temperature           193(2)
_cell_measurement_reflns_used           3967
_cell_measurement_theta_min             3.3177
_cell_measurement_theta_max             29.05
_cell_measurement_wavelength            0.71073
 
#----------------------------------------------------------------------------#
#                   CRYSTAL INFORMATION                                      #
#----------------------------------------------------------------------------#
 
_exptl_crystal_description              plate
_exptl_crystal_colour                   green
_exptl_crystal_size_max                 0.22
_exptl_crystal_size_mid                 0.16
_exptl_crystal_size_min                 0.04
_exptl_crystal_density_diffrn           2.207
_exptl_crystal_density_method           'not measured'
_exptl_crystal_F_000                    672
_exptl_special_details
;
 ?
;
 
#----------------------------------------------------------------------------#
#                   ABSORPTION CORRECTION                                    #
#----------------------------------------------------------------------------#
 
_exptl_absorpt_coefficient_mu           4.4
_exptl_absorpt_correction_type          multi-scan
_exptl_absorpt_process_details
;
        CrysAlisPro, Oxford Diffraction Ltd.,
Version 1.171.33.66 (release 28-04-2010 CrysAlis171 .NET)
(compiled Apr 28 2010,14:27:37)
Empirical absorption correction using spherical harmonics,
 implemented in SCALE3 ABSPACK scaling algorithm.
;
_exptl_absorpt_correction_T_min         0.420
_exptl_absorpt_correction_T_max         0.839
 
#----------------------------------------------------------------------------#
#                   DATA COLLECTION                                          #
#----------------------------------------------------------------------------#
 
_diffrn_ambient_temperature             193(2)
_diffrn_radiation_wavelength            0.71073
_diffrn_radiation_type                  MoK\a
_diffrn_radiation_source          'Enhance (Mo) X-ray Source'
_diffrn_radiation_monochromator   'graphite'
_diffrn_measurement_device_type   'Xcalibur, Eos, Gemini ultra'
_diffrn_measurement_method        \w-\f
_diffrn_standards_number          0
_diffrn_standards_interval_count  0
_diffrn_standards_interval_time   0
_diffrn_standards_decay_%         0
_diffrn_radiation_probe                 x-ray
_diffrn_reflns_av_R_equivalents         0.0338
_diffrn_reflns_av_unetI/netI            0.035
_diffrn_reflns_number                   6460
_diffrn_reflns_limit_h_min              -9
_diffrn_reflns_limit_h_max              9
_diffrn_reflns_limit_k_min              -15
_diffrn_reflns_limit_k_max              15
_diffrn_reflns_limit_l_min              -15
_diffrn_reflns_limit_l_max              15
_diffrn_reflns_theta_min                3.32
_diffrn_reflns_theta_max                26.37
_diffrn_reflns_theta_full               26.37
_diffrn_measured_fraction_theta_full
                                        0.986
_diffrn_measured_fraction_theta_max
                                        0.986
_reflns_number_total                    2178
_reflns_number_gt                       1894
_reflns_threshold_expression            >2sigma(I)
 
#----------------------------------------------------------------------------#
#                   COMPUTER PROGRAMS USED                                   #
#----------------------------------------------------------------------------#
 
_computing_data_collection              'CrysAlisPro, Oxford Diffraction Ltd.'
_computing_cell_refinement              'CrysAlisPro, Oxford Diffraction Ltd.'
_computing_data_reduction               'CrysAlisPro, Oxford Diffraction Ltd.' 
_computing_structure_solution           'SIR92 (Giacovazzo et al, 1993)'
_computing_structure_refinement         'SHELXL-97 (Sheldrick, 1997)'
_computing_molecular_graphics           'Ortep-3 for Windows (Farrugia, 1997)'
_computing_publication_material
                                   'WinGX publication routines (Farrugia, 1999)'
 
#----------------------------------------------------------------------------#
#                   STRUCTURE SOLUTION
#----------------------------------------------------------------------------#
 
_atom_sites_solution_primary            direct
_atom_sites_solution_secondary          difmap
_atom_sites_solution_hydrogens          geom
 
#----------------------------------------------------------------------------#
#                   REFINEMENT INFORMATION                                   #
#----------------------------------------------------------------------------#
 
_refine_special_details
;
 Refinement of F^2^ against ALL reflections.  The weighted R-factor wR and
 goodness of fit S are based on F^2^, conventional R-factors R are based
 on F, with F set to zero for negative F^2^. The threshold expression of
 F^2^ > 2sigma(F^2^) is used only for calculating R-factors(gt) etc. and is
 not relevant to the choice of reflections for refinement.  R-factors based
 on F^2^ are statistically about twice as large as those based on F, and R-
 factors based on ALL data will be even larger.
;
_refine_ls_structure_factor_coef        Fsqd
_refine_ls_matrix_type                  full
_refine_ls_weighting_scheme             calc
_refine_ls_weighting_details
         'calc w=1/[\s^2^(Fo^2^)+(0.0332P)^2^+0.0000P] where P=(Fo^2^+2Fc^2^)/3'
_refine_ls_hydrogen_treatment           mixed
_refine_ls_extinction_method            none
_refine_ls_number_reflns                2178
_refine_ls_number_parameters            105
_refine_ls_number_restraints            1
_refine_ls_R_factor_all                 0.0341
_refine_ls_R_factor_gt                  0.0268
_refine_ls_wR_factor_ref                0.068
_refine_ls_wR_factor_gt                 0.0626
_refine_ls_goodness_of_fit_ref          1.052
_refine_ls_restrained_S_all             1.051
_refine_ls_shift/su_max                 0.001
_refine_ls_shift/su_mean                0
_refine_diff_density_max                0.795
_refine_diff_density_min                -0.633
_refine_diff_density_rms                0.131
 
#----------------------------------------------------------------------------#
#                   ATOMIC TYPES, COORDINATES AND THERMAL PARAMETERS         #
#----------------------------------------------------------------------------#
 
loop_
    _atom_type_symbol
    _atom_type_description
    _atom_type_scat_dispersion_real
    _atom_type_scat_dispersion_imag
    _atom_type_scat_source
C C 0.0033 0.0016 'International Tables Vol C Tables 4.2.6.8 and 6.1.1.4'
H H 0 0 'International Tables Vol C Tables 4.2.6.8 and 6.1.1.4'
I I -0.4742 1.8119 'International Tables Vol C Tables 4.2.6.8 and 6.1.1.4'
N N 0.0061 0.0033 'International Tables Vol C Tables 4.2.6.8 and 6.1.1.4'
O O 0.0106 0.006 'International Tables Vol C Tables 4.2.6.8 and 6.1.1.4'
Rh Rh -1.1178 0.9187 'International Tables Vol C Tables 4.2.6.8 and 6.1.1.4'
 
loop_
    _atom_site_label
    _atom_site_type_symbol
    _atom_site_fract_x
    _atom_site_fract_y
    _atom_site_fract_z
    _atom_site_U_iso_or_equiv
    _atom_site_adp_type
    _atom_site_occupancy
    _atom_site_symmetry_multiplicity
    _atom_site_calc_flag
    _atom_site_refinement_flags
    _atom_site_disorder_assembly
    _atom_site_disorder_group
I1 I 0.80233(4) 0.34007(2) 0.87811(2) 0.03401(11) Uani 1 1 d . . .
Rh1 Rh 0.78475(4) 0.43418(3) 0.67939(3) 0.02527(11) Uani 1 1 d . . .
O1 O 0.4981(4) 0.2709(3) 0.5262(3) 0.0430(8) Uani 1 1 d . . .
O2 O 0.7751(5) 0.5287(3) 0.4531(3) 0.0530(9) Uani 1 1 d . . .
N1 N 0.9706(4) 0.5551(3) 0.7951(3) 0.0256(7) Uani 1 1 d D . .
H1A H 0.988(5) 0.535(3) 0.8685(19) 0.031 Uiso 1 1 d D . .
C1 C 0.6091(6) 0.3314(4) 0.5838(4) 0.0307(9) Uani 1 1 d . . .
C2 C 0.7804(6) 0.4946(4) 0.5394(4) 0.0338(10) Uani 1 1 d . . .
C3 C 1.1632(6) 0.5588(3) 0.8004(4) 0.0328(10) Uani 1 1 d . . .
H3A H 1.1483 0.5795 0.7181 0.039 Uiso 1 1 calc R . .
H3B H 1.2417 0.6136 0.8608 0.039 Uiso 1 1 calc R . .
C4 C 1.2638(6) 0.4552(4) 0.8369(5) 0.0438(12) Uani 1 1 d . . .
H4A H 1.2829 0.4357 0.9196 0.066 Uiso 1 1 calc R . .
H4B H 1.3878 0.461 0.838 0.066 Uiso 1 1 calc R . .
H4C H 1.1869 0.4008 0.7771 0.066 Uiso 1 1 calc R . .
C5 C 0.8817(6) 0.6622(3) 0.7695(4) 0.0314(9) Uani 1 1 d . . .
H5A H 0.8507 0.6839 0.6842 0.038 Uiso 1 1 calc R . .
H5B H 0.9736 0.7141 0.8277 0.038 Uiso 1 1 calc R . .
C6 C 0.7021(7) 0.6630(4) 0.7834(5) 0.0429(11) Uani 1 1 d . . .
H6A H 0.6141 0.6087 0.7295 0.064 Uiso 1 1 calc R . .
H6B H 0.6414 0.7327 0.7599 0.064 Uiso 1 1 calc R . .
H6C H 0.7344 0.6481 0.8698 0.064 Uiso 1 1 calc R . .
 
loop_
    _atom_site_aniso_label
    _atom_site_aniso_U_11
    _atom_site_aniso_U_22
    _atom_site_aniso_U_33
    _atom_site_aniso_U_23
    _atom_site_aniso_U_13
    _atom_site_aniso_U_12
I1 0.03860(18) 0.0366(2) 0.02718(17) -0.00226(12) 0.01568(13) -0.00924(13)
Rh1 0.02354(18) 0.0296(2) 0.02017(17) -0.00226(13) 0.00812(13) 0.00117(13)
O1 0.0393(18) 0.0375(19) 0.0390(18) -0.0106(15) 0.0072(14) -0.0047(15)
O2 0.058(2) 0.071(3) 0.0353(19) 0.0108(18) 0.0262(17) 0.0084(19)
N1 0.0277(17) 0.0241(18) 0.0231(17) 0.0024(14) 0.0104(14) 0.0031(14)
C1 0.029(2) 0.035(2) 0.024(2) -0.0006(19) 0.0094(17) 0.006(2)
C2 0.031(2) 0.044(3) 0.025(2) -0.005(2) 0.0119(17) 0.003(2)
C3 0.029(2) 0.034(2) 0.038(2) -0.006(2) 0.0184(18) -0.0057(19)
C4 0.027(2) 0.045(3) 0.057(3) 0.004(2) 0.018(2) 0.011(2)
C5 0.038(2) 0.024(2) 0.031(2) 0.0021(18) 0.0154(19) 0.0055(18)
C6 0.042(3) 0.037(3) 0.050(3) 0.002(2) 0.021(2) 0.011(2)
 
 
#----------------------------------------------------------------------------#
#                   MOLECULAR GEOMETRY                                       #
#----------------------------------------------------------------------------#
 
_geom_special_details
;
 All esds (except the esd in the dihedral angle between two l.s. planes)
 are estimated using the full covariance matrix.  The cell esds are taken
 into account individually in the estimation of esds in distances, angles
 and torsion angles; correlations between esds in cell parameters are only
 used when they are defined by crystal symmetry.  An approximate (isotropic)
 treatment of cell esds is used for estimating esds involving l.s. planes.
;
loop_
    _geom_bond_atom_site_label_1
    _geom_bond_atom_site_label_2
    _geom_bond_distance
    _geom_bond_site_symmetry_2
    _geom_bond_publ_flag
I1 Rh1 2.6450(10) . ?
Rh1 C2 1.857(4) . ?
Rh1 C1 1.862(5) . ?
Rh1 N1 2.134(3) . ?
O1 C1 1.128(5) . ?
O2 C2 1.120(5) . ?
N1 C5 1.490(5) . ?
N1 C3 1.498(5) . ?
N1 H1A 0.879(10) . ?
C3 C4 1.488(6) . ?
C3 H3A 0.99 . ?
C3 H3B 0.99 . ?
C4 H4A 0.98 . ?
C4 H4B 0.98 . ?
C4 H4C 0.98 . ?
C5 C6 1.510(6) . ?
C5 H5A 0.99 . ?
C5 H5B 0.99 . ?
C6 H6A 0.98 . ?
C6 H6B 0.98 . ?
C6 H6C 0.98 . ?
 
loop_
    _geom_angle_atom_site_label_1
    _geom_angle_atom_site_label_2
    _geom_angle_atom_site_label_3
    _geom_angle
    _geom_angle_site_symmetry_1
    _geom_angle_site_symmetry_3
    _geom_angle_publ_flag
C2 Rh1 C1 91.30(19) . . ?
C2 Rh1 N1 91.44(16) . . ?
C1 Rh1 N1 175.30(15) . . ?
C2 Rh1 I1 176.99(13) . . ?
C1 Rh1 I1 88.01(13) . . ?
N1 Rh1 I1 89.46(9) . . ?
C5 N1 C3 110.7(3) . . ?
C5 N1 Rh1 113.5(2) . . ?
C3 N1 Rh1 115.2(2) . . ?
C5 N1 H1A 108(3) . . ?
C3 N1 H1A 107(3) . . ?
Rh1 N1 H1A 101(3) . . ?
O1 C1 Rh1 177.7(4) . . ?
O2 C2 Rh1 178.1(4) . . ?
C4 C3 N1 112.2(3) . . ?
C4 C3 H3A 109.2 . . ?
N1 C3 H3A 109.2 . . ?
C4 C3 H3B 109.2 . . ?
N1 C3 H3B 109.2 . . ?
H3A C3 H3B 107.9 . . ?
C3 C4 H4A 109.5 . . ?
C3 C4 H4B 109.5 . . ?
H4A C4 H4B 109.5 . . ?
C3 C4 H4C 109.5 . . ?
H4A C4 H4C 109.5 . . ?
H4B C4 H4C 109.5 . . ?
N1 C5 C6 111.2(4) . . ?
N1 C5 H5A 109.4 . . ?
C6 C5 H5A 109.4 . . ?
N1 C5 H5B 109.4 . . ?
C6 C5 H5B 109.4 . . ?
H5A C5 H5B 108 . . ?
C5 C6 H6A 109.5 . . ?
C5 C6 H6B 109.5 . . ?
H6A C6 H6B 109.5 . . ?
C5 C6 H6C 109.5 . . ?
H6A C6 H6C 109.5 . . ?
H6B C6 H6C 109.5 . . ?

#===END

data_4d

#----------------------------------------------------------------------------#
#                   CHEMICAL INFORMATION                                     #
#----------------------------------------------------------------------------#
 
_chemical_name_systematic
;
 ?
;
_chemical_formula_moiety                'C6 H6 I N2 O2 Rh'
_chemical_formula_sum                   'C6 H6 I N2 O2 Rh'
_chemical_formula_weight                367.94
_chemical_compound_source               'synthesis as described'
 
#----------------------------------------------------------------------------#
#                   UNIT CELL INFORMATION                                    #
#----------------------------------------------------------------------------#
 
_symmetry_cell_setting                  monoclinic
_symmetry_space_group_name_H-M          'P 21/c'
_symmetry_space_group_name_Hall         '-P 2ybc'
_symmetry_Int_Tables_number             14
loop_
    _symmetry_equiv_pos_as_xyz
'x, y, z'
'-x, y+1/2, -z+1/2'
'-x, -y, -z'
'x, -y-1/2, z-1/2'
 
_cell_length_a                          11.2116(10)
_cell_length_b                          7.5428(6)
_cell_length_c                          14.1730(11)
_cell_angle_alpha                       90
_cell_angle_beta                        126.628(5)
_cell_angle_gamma                       90
_cell_volume                            961.88(15)
_cell_formula_units_Z                   4
_cell_measurement_temperature           180(2)
_cell_measurement_reflns_used           3760
_cell_measurement_theta_min             2.26
_cell_measurement_theta_max             30.31
_cell_measurement_wavelength            0.71073
 
#----------------------------------------------------------------------------#
#                   CRYSTAL INFORMATION                                      #
#----------------------------------------------------------------------------#
 
_exptl_crystal_description              plate
_exptl_crystal_colour                   orange
_exptl_crystal_size_max                 0.12
_exptl_crystal_size_mid                 0.08
_exptl_crystal_size_min                 0.04
_exptl_crystal_density_diffrn           2.541
_exptl_crystal_density_method           'not measured'
_exptl_crystal_F_000                    680
_exptl_special_details
;
 ?
;
 
#----------------------------------------------------------------------------#
#                   ABSORPTION CORRECTION                                    #
#----------------------------------------------------------------------------#
 
_exptl_absorpt_coefficient_mu           4.947
_exptl_absorpt_correction_type          multi-scan
_exptl_absorpt_process_details
;
        [c.f. r.h. blessing, acta cryst. (1995), a51, 33-38]
;
_exptl_absorpt_correction_T_min         0.620
_exptl_absorpt_correction_T_max         0.820
 
#----------------------------------------------------------------------------#
#                   DATA COLLECTION                                          #
#----------------------------------------------------------------------------#
 
_diffrn_ambient_temperature             180(2)
_diffrn_radiation_wavelength            0.71073
_diffrn_radiation_type                  MoK\a
_diffrn_radiation_source          'fine-focus sealed tube'
_diffrn_radiation_monochromator   graphite
_diffrn_measurement_device_type   'Bruker Kappa APEX II'
_diffrn_measurement_method        \w-\f
_diffrn_standards_number          0
_diffrn_standards_interval_count  0
_diffrn_standards_interval_time   0
_diffrn_standards_decay_%         0
_diffrn_radiation_probe                 x-ray
_diffrn_reflns_av_R_equivalents         0.0262
_diffrn_reflns_av_unetI/netI            0.0287
_diffrn_reflns_number                   10584
_diffrn_reflns_limit_h_min              -15
_diffrn_reflns_limit_h_max              15
_diffrn_reflns_limit_k_min              -9
_diffrn_reflns_limit_k_max              10
_diffrn_reflns_limit_l_min              -17
_diffrn_reflns_limit_l_max              20
_diffrn_reflns_theta_min                2.26
_diffrn_reflns_theta_max                30.46
_diffrn_reflns_theta_full               30.46
_diffrn_measured_fraction_theta_full
                                        0.997
_diffrn_measured_fraction_theta_max
                                        0.997
_reflns_number_total                    2914
_reflns_number_gt                       2116
_reflns_threshold_expression            >2sigma(I)
 
#----------------------------------------------------------------------------#
#                   COMPUTER PROGRAMS USED                                   #
#----------------------------------------------------------------------------#
 
_computing_data_collection              'Bruker SMART'
_computing_cell_refinement              'Bruker SMART'
_computing_data_reduction               'Bruker SAINT' 
_computing_structure_solution           'SHELXS-97 (Sheldrick, 1990)'
_computing_structure_refinement         'SHELXL-97 (Sheldrick, 1997)'
_computing_molecular_graphics           'Ortep-3 for Windows (Farrugia, 1997)'
_computing_publication_material
                                   'WinGX publication routines (Farrugia, 1999)'
 
#----------------------------------------------------------------------------#
#                   STRUCTURE SOLUTION
#----------------------------------------------------------------------------#
 
_atom_sites_solution_primary            direct
_atom_sites_solution_secondary          difmap
_atom_sites_solution_hydrogens          geom
 
#----------------------------------------------------------------------------#
#                   REFINEMENT INFORMATION                                   #
#----------------------------------------------------------------------------#
 
_refine_special_details
;
 Refinement of F^2^ against ALL reflections.  The weighted R-factor wR and
 goodness of fit S are based on F^2^, conventional R-factors R are based
 on F, with F set to zero for negative F^2^. The threshold expression of
 F^2^ > 2sigma(F^2^) is used only for calculating R-factors(gt) etc. and is
 not relevant to the choice of reflections for refinement.  R-factors based
 on F^2^ are statistically about twice as large as those based on F, and R-
 factors based on ALL data will be even larger.
;
_refine_ls_structure_factor_coef        Fsqd
_refine_ls_matrix_type                  full
_refine_ls_weighting_scheme             calc
_refine_ls_weighting_details
         'calc w=1/[\s^2^(Fo^2^)+(0.0149P)^2^+0.2642P] where P=(Fo^2^+2Fc^2^)/3'
_refine_ls_hydrogen_treatment           constr
_refine_ls_extinction_method            none
_refine_ls_number_reflns                2914
_refine_ls_number_parameters            110
_refine_ls_number_restraints            0
_refine_ls_R_factor_all                 0.0407
_refine_ls_R_factor_gt                  0.0211
_refine_ls_wR_factor_ref                0.0423
_refine_ls_wR_factor_gt                 0.0374
_refine_ls_goodness_of_fit_ref          0.985
_refine_ls_restrained_S_all             0.985
_refine_ls_shift/su_max                 0.011
_refine_ls_shift/su_mean                0
_refine_diff_density_max                0.488
_refine_diff_density_min                -0.511
_refine_diff_density_rms                0.113
 
#----------------------------------------------------------------------------#
#                   ATOMIC TYPES, COORDINATES AND THERMAL PARAMETERS         #
#----------------------------------------------------------------------------#
 
loop_
    _atom_type_symbol
    _atom_type_description
    _atom_type_scat_dispersion_real
    _atom_type_scat_dispersion_imag
    _atom_type_scat_source
C C 0.0033 0.0016 'International Tables Vol C Tables 4.2.6.8 and 6.1.1.4'
H H 0 0 'International Tables Vol C Tables 4.2.6.8 and 6.1.1.4'
I I -0.4742 1.8119 'International Tables Vol C Tables 4.2.6.8 and 6.1.1.4'
N N 0.0061 0.0033 'International Tables Vol C Tables 4.2.6.8 and 6.1.1.4'
O O 0.0106 0.006 'International Tables Vol C Tables 4.2.6.8 and 6.1.1.4'
Rh Rh -1.1178 0.9187 'International Tables Vol C Tables 4.2.6.8 and 6.1.1.4'
 
loop_
    _atom_site_label
    _atom_site_type_symbol
    _atom_site_fract_x
    _atom_site_fract_y
    _atom_site_fract_z
    _atom_site_U_iso_or_equiv
    _atom_site_adp_type
    _atom_site_occupancy
    _atom_site_symmetry_multiplicity
    _atom_site_calc_flag
    _atom_site_refinement_flags
    _atom_site_disorder_assembly
    _atom_site_disorder_group
I1 I 1.142659(19) 0.65183(2) 0.685192(14) 0.02639(5) Uani 1 1 d . . .
Rh1 Rh 0.99743(2) 0.64974(3) 0.780109(17) 0.02388(6) Uani 1 1 d . . .
O1 O 1.2922(2) 0.6302(3) 1.01471(17) 0.0413(5) Uani 1 1 d . . .
O2 O 0.8403(2) 0.6386(3) 0.89177(18) 0.0382(5) Uani 1 1 d . . .
N1 N 0.7899(2) 0.6654(3) 0.61458(18) 0.0247(5) Uani 1 1 d . . .
N2 N 0.6067(2) 0.6122(3) 0.43006(18) 0.0237(5) Uani 1 1 d . . .
C1 C 1.1796(3) 0.6367(4) 0.9252(2) 0.0300(6) Uani 1 1 d . . .
C2 C 0.9008(3) 0.6443(4) 0.8508(2) 0.0293(6) Uani 1 1 d . . .
C3 C 0.7510(3) 0.5870(3) 0.5164(2) 0.0253(6) Uani 1 1 d . . .
H3 H 0.8169 0.5215 0.5084 0.03 Uiso 1 1 calc R . .
C4 C 0.5493(3) 0.7127(4) 0.4748(2) 0.0322(6) Uani 1 1 d . . .
H4 H 0.4496 0.7521 0.4342 0.039 Uiso 1 1 calc R . .
C5 C 0.6630(3) 0.7444(4) 0.5882(2) 0.0308(6) Uani 1 1 d . . .
H5 H 0.6563 0.8113 0.6416 0.037 Uiso 1 1 calc R . .
C6 C 0.5234(3) 0.5434(4) 0.3104(2) 0.0375(7) Uani 1 1 d . . .
H6A H 0.591 0.5244 0.2892 0.056 Uiso 1 1 calc R . .
H6B H 0.4465 0.6289 0.256 0.056 Uiso 1 1 calc R . .
H6C H 0.4766 0.4308 0.3057 0.056 Uiso 1 1 calc R . .
 
loop_
    _atom_site_aniso_label
    _atom_site_aniso_U_11
    _atom_site_aniso_U_22
    _atom_site_aniso_U_33
    _atom_site_aniso_U_23
    _atom_site_aniso_U_13
    _atom_site_aniso_U_12
I1 0.02090(9) 0.03452(10) 0.02429(9) 0.00118(8) 0.01377(8) -0.00007(8)
Rh1 0.01917(11) 0.03237(12) 0.01885(10) -0.00164(9) 0.01066(9) -0.00165(9)
O1 0.0270(12) 0.0664(15) 0.0224(10) 0.0009(10) 0.0103(9) 0.0008(11)
O2 0.0405(13) 0.0476(12) 0.0378(11) -0.0087(10) 0.0294(11) -0.0075(11)
N1 0.0208(11) 0.0285(11) 0.0224(11) -0.0014(10) 0.0117(10) -0.0014(10)
N2 0.0197(11) 0.0280(12) 0.0221(11) -0.0008(9) 0.0117(10) 0.0016(9)
C1 0.0299(15) 0.0372(16) 0.0278(14) -0.0006(13) 0.0198(13) 0.0004(13)
C2 0.0281(15) 0.0319(14) 0.0259(13) -0.0055(13) 0.0150(12) -0.0041(13)
C3 0.0195(13) 0.0299(14) 0.0237(13) 0.0007(11) 0.0114(12) 0.0016(11)
C4 0.0211(15) 0.0402(16) 0.0328(16) -0.0007(13) 0.0148(13) 0.0051(12)
C5 0.0255(15) 0.0354(15) 0.0311(15) -0.0073(13) 0.0166(13) -0.0006(13)
C6 0.0259(15) 0.0514(18) 0.0245(14) -0.0073(14) 0.0093(13) -0.0007(15)
 
 
#----------------------------------------------------------------------------#
#                   MOLECULAR GEOMETRY                                       #
#----------------------------------------------------------------------------#
 
_geom_special_details
;
 All esds (except the esd in the dihedral angle between two l.s. planes)
 are estimated using the full covariance matrix.  The cell esds are taken
 into account individually in the estimation of esds in distances, angles
 and torsion angles; correlations between esds in cell parameters are only
 used when they are defined by crystal symmetry.  An approximate (isotropic)
 treatment of cell esds is used for estimating esds involving l.s. planes.
;
loop_
    _geom_bond_atom_site_label_1
    _geom_bond_atom_site_label_2
    _geom_bond_distance
    _geom_bond_site_symmetry_2
    _geom_bond_publ_flag
I1 Rh1 2.6599(3) . ?
Rh1 C1 1.844(3) . ?
Rh1 C2 1.863(3) . ?
Rh1 N1 2.102(2) . ?
O1 C1 1.138(3) . ?
O2 C2 1.127(3) . ?
N1 C3 1.323(3) . ?
N1 C5 1.372(3) . ?
N2 C3 1.338(3) . ?
N2 C4 1.370(3) . ?
N2 C6 1.458(3) . ?
C3 H3 0.95 . ?
C4 C5 1.349(4) . ?
C4 H4 0.95 . ?
C5 H5 0.95 . ?
C6 H6A 0.98 . ?
C6 H6B 0.98 . ?
C6 H6C 0.98 . ?
 
loop_
    _geom_angle_atom_site_label_1
    _geom_angle_atom_site_label_2
    _geom_angle_atom_site_label_3
    _geom_angle
    _geom_angle_site_symmetry_1
    _geom_angle_site_symmetry_3
    _geom_angle_publ_flag
C1 Rh1 C2 90.67(12) . . ?
C1 Rh1 N1 179.83(12) . . ?
C2 Rh1 N1 89.41(10) . . ?
C1 Rh1 I1 87.67(8) . . ?
C2 Rh1 I1 178.13(9) . . ?
N1 Rh1 I1 92.25(6) . . ?
C3 N1 C5 105.6(2) . . ?
C3 N1 Rh1 126.79(18) . . ?
C5 N1 Rh1 127.30(17) . . ?
C3 N2 C4 107.5(2) . . ?
C3 N2 C6 126.8(2) . . ?
C4 N2 C6 125.7(2) . . ?
O1 C1 Rh1 179.4(3) . . ?
O2 C2 Rh1 178.6(3) . . ?
N1 C3 N2 111.0(2) . . ?
N1 C3 H3 124.5 . . ?
N2 C3 H3 124.5 . . ?
C5 C4 N2 106.1(2) . . ?
C5 C4 H4 126.9 . . ?
N2 C4 H4 126.9 . . ?
C4 C5 N1 109.7(2) . . ?
C4 C5 H5 125.1 . . ?
N1 C5 H5 125.1 . . ?
N2 C6 H6A 109.5 . . ?
N2 C6 H6B 109.5 . . ?
H6A C6 H6B 109.5 . . ?
N2 C6 H6C 109.5 . . ?
H6A C6 H6C 109.5 . . ?
H6B C6 H6C 109.5 . . ?

#===END

data_4e

#----------------------------------------------------------------------------#
#                   CHEMICAL INFORMATION                                     #
#----------------------------------------------------------------------------#
 
_chemical_name_systematic
;
 ?
;
_chemical_formula_moiety                'C5 H4 I N2 O2 Rh'
_chemical_formula_sum                   'C5 H4 I N2 O2 Rh'
_chemical_formula_weight                353.91
_chemical_compound_source               'synthesis as described'
 
#----------------------------------------------------------------------------#
#                   UNIT CELL INFORMATION                                    #
#----------------------------------------------------------------------------#
 
_symmetry_cell_setting                  monoclinic
_symmetry_space_group_name_H-M          'P 21/c'
_symmetry_space_group_name_Hall         '-P 2ybc'
_symmetry_Int_Tables_number             14
loop_
    _symmetry_equiv_pos_as_xyz
'x, y, z'
'-x, y+1/2, -z+1/2'
'-x, -y, -z'
'x, -y-1/2, z-1/2'
 
_cell_length_a                          10.3601(3)
_cell_length_b                          7.0604(2)
_cell_length_c                          14.5503(4)
_cell_angle_alpha                       90
_cell_angle_beta                        121.741(2)
_cell_angle_gamma                       90
_cell_volume                            905.12(5)
_cell_formula_units_Z                   4
_cell_measurement_temperature           180(2)
_cell_measurement_reflns_used           4633
_cell_measurement_theta_min             2.86
_cell_measurement_theta_max             30.61
_cell_measurement_wavelength            0.71073
 
#----------------------------------------------------------------------------#
#                   CRYSTAL INFORMATION                                      #
#----------------------------------------------------------------------------#
 
_exptl_crystal_description              plate
_exptl_crystal_colour                   orange
_exptl_crystal_size_max                 0.14
_exptl_crystal_size_mid                 0.04
_exptl_crystal_size_min                 0.02
_exptl_crystal_density_diffrn           2.597
_exptl_crystal_density_method           'not measured'
_exptl_crystal_F_000                    648
_exptl_special_details
;
 ?
;
 
#----------------------------------------------------------------------------#
#                   ABSORPTION CORRECTION                                    #
#----------------------------------------------------------------------------#
 
_exptl_absorpt_coefficient_mu           5.252
_exptl_absorpt_correction_type          multi-scan
_exptl_absorpt_process_details
;
        [c.f. r.h. blessing, acta cryst. (1995), a51, 33-38]
;
_exptl_absorpt_correction_T_min         0.778
_exptl_absorpt_correction_T_max         0.900
 
#----------------------------------------------------------------------------#
#                   DATA COLLECTION                                          #
#----------------------------------------------------------------------------#
 
_diffrn_ambient_temperature             180(2)
_diffrn_radiation_wavelength            0.71073
_diffrn_radiation_type                  MoK\a
_diffrn_radiation_source          'fine-focus sealed tube'
_diffrn_radiation_monochromator   graphite
_diffrn_measurement_device_type   'Bruker Kappa APEX II'
_diffrn_measurement_method        \w-\f
_diffrn_standards_number          0
_diffrn_standards_interval_count  0
_diffrn_standards_interval_time   0
_diffrn_standards_decay_%         0
_diffrn_radiation_probe                 x-ray
_diffrn_reflns_av_R_equivalents         0.0326
_diffrn_reflns_av_unetI/netI            0.0283
_diffrn_reflns_number                   12040
_diffrn_reflns_limit_h_min              -14
_diffrn_reflns_limit_h_max              14
_diffrn_reflns_limit_k_min              -10
_diffrn_reflns_limit_k_max              9
_diffrn_reflns_limit_l_min              -20
_diffrn_reflns_limit_l_max              20
_diffrn_reflns_theta_min                2.86
_diffrn_reflns_theta_max                30.61
_diffrn_reflns_theta_full               30.61
_diffrn_measured_fraction_theta_full
                                        0.996
_diffrn_measured_fraction_theta_max
                                        0.996
_reflns_number_total                    2777
_reflns_number_gt                       2096
_reflns_threshold_expression            >2sigma(I)
 
#----------------------------------------------------------------------------#
#                   COMPUTER PROGRAMS USED                                   #
#----------------------------------------------------------------------------#
 
_computing_data_collection              'Bruker SMART'
_computing_cell_refinement              'Bruker SMART'
_computing_data_reduction               'Bruker SAINT'   
_computing_structure_solution           'SHELXS-97 (Sheldrick, 1990)'
_computing_structure_refinement         'SHELXL-97 (Sheldrick, 1997)'
_computing_molecular_graphics           'Ortep-3 for Windows (Farrugia, 1997)'
_computing_publication_material
                                   'WinGX publication routines (Farrugia, 1999)'
 
#----------------------------------------------------------------------------#
#                   STRUCTURE SOLUTION
#----------------------------------------------------------------------------#
 
_atom_sites_solution_primary            direct
_atom_sites_solution_secondary          difmap
_atom_sites_solution_hydrogens          geom
 
#----------------------------------------------------------------------------#
#                   REFINEMENT INFORMATION                                   #
#----------------------------------------------------------------------------#
 
_refine_special_details
;
 Refinement of F^2^ against ALL reflections.  The weighted R-factor wR and
 goodness of fit S are based on F^2^, conventional R-factors R are based
 on F, with F set to zero for negative F^2^. The threshold expression of
 F^2^ > 2sigma(F^2^) is used only for calculating R-factors(gt) etc. and is
 not relevant to the choice of reflections for refinement.  R-factors based
 on F^2^ are statistically about twice as large as those based on F, and R-
 factors based on ALL data will be even larger.
;
_refine_ls_structure_factor_coef        Fsqd
_refine_ls_matrix_type                  full
_refine_ls_weighting_scheme             calc
_refine_ls_weighting_details
         'calc w=1/[\s^2^(Fo^2^)+(0.0178P)^2^+0.5761P] where P=(Fo^2^+2Fc^2^)/3'
_refine_ls_hydrogen_treatment           mixed
_refine_ls_extinction_method            none
_refine_ls_number_reflns                2777
_refine_ls_number_parameters            103
_refine_ls_number_restraints            1
_refine_ls_R_factor_all                 0.0371
_refine_ls_R_factor_gt                  0.021
_refine_ls_wR_factor_ref                0.0498
_refine_ls_wR_factor_gt                 0.0441
_refine_ls_goodness_of_fit_ref          1.008
_refine_ls_restrained_S_all             1.008
_refine_ls_shift/su_max                 0.002
_refine_ls_shift/su_mean                0
_refine_diff_density_max                1.103
_refine_diff_density_min                -0.541
_refine_diff_density_rms                0.112
 
#----------------------------------------------------------------------------#
#                   ATOMIC TYPES, COORDINATES AND THERMAL PARAMETERS         #
#----------------------------------------------------------------------------#
 
loop_
    _atom_type_symbol
    _atom_type_description
    _atom_type_scat_dispersion_real
    _atom_type_scat_dispersion_imag
    _atom_type_scat_source
C C 0.0033 0.0016 'International Tables Vol C Tables 4.2.6.8 and 6.1.1.4'
I I -0.4742 1.8119 'International Tables Vol C Tables 4.2.6.8 and 6.1.1.4'
N N 0.0061 0.0033 'International Tables Vol C Tables 4.2.6.8 and 6.1.1.4'
O O 0.0106 0.006 'International Tables Vol C Tables 4.2.6.8 and 6.1.1.4'
Rh Rh -1.1178 0.9187 'International Tables Vol C Tables 4.2.6.8 and 6.1.1.4'
H H 0 0 'International Tables Vol C Tables 4.2.6.8 and 6.1.1.4'
 
loop_
    _atom_site_label
    _atom_site_type_symbol
    _atom_site_fract_x
    _atom_site_fract_y
    _atom_site_fract_z
    _atom_site_U_iso_or_equiv
    _atom_site_adp_type
    _atom_site_occupancy
    _atom_site_symmetry_multiplicity
    _atom_site_calc_flag
    _atom_site_refinement_flags
    _atom_site_disorder_assembly
    _atom_site_disorder_group
I1 I 1.164877(19) 0.10987(3) 0.444959(13) 0.02907(6) Uani 1 1 d . . .
Rh1 Rh 1.00880(2) 0.10984(3) 0.229823(15) 0.02424(6) Uani 1 1 d . . .
O2 O 0.8603(3) 0.1093(3) -0.01099(16) 0.0402(5) Uani 1 1 d . . .
O1 O 1.3098(3) 0.1060(4) 0.2506(2) 0.0583(7) Uani 1 1 d . . .
N1 N 0.7974(2) 0.1124(3) 0.21715(16) 0.0252(4) Uani 1 1 d . . .
N2 N 0.7776(3) 0.0906(4) 0.30054(18) 0.0327(6) Uani 1 1 d D . .
H2A H 0.859(2) 0.076(5) 0.3641(14) 0.039 Uiso 1 1 d D . .
C2 C 0.9145(3) 0.1096(4) 0.0800(2) 0.0287(6) Uani 1 1 d . . .
C1 C 1.1949(4) 0.1074(5) 0.2425(3) 0.0379(7) Uani 1 1 d . . .
C3 C 0.6316(3) 0.0933(5) 0.2694(2) 0.0397(8) Uani 1 1 d . . .
H3 H 0.5917 0.0807 0.3149 0.048 Uiso 1 1 calc R . .
C4 C 0.5501(3) 0.1178(5) 0.1600(2) 0.0393(7) Uani 1 1 d . . .
H4 H 0.4429 0.125 0.1138 0.047 Uiso 1 1 calc R . .
C5 C 0.6569(3) 0.1297(5) 0.1313(2) 0.0396(8) Uani 1 1 d . . .
H5 H 0.6336 0.1479 0.0594 0.048 Uiso 1 1 calc R . .
 
loop_
    _atom_site_aniso_label
    _atom_site_aniso_U_11
    _atom_site_aniso_U_22
    _atom_site_aniso_U_33
    _atom_site_aniso_U_23
    _atom_site_aniso_U_13
    _atom_site_aniso_U_12
I1 0.02422(9) 0.03009(10) 0.02355(9) -0.00014(7) 0.00614(7) -0.00191(7)
Rh1 0.02104(10) 0.02920(12) 0.02355(10) 0.00058(8) 0.01246(8) -0.00012(8)
O2 0.0583(14) 0.0358(12) 0.0297(10) 0.0041(9) 0.0254(10) 0.0036(10)
O1 0.0352(13) 0.081(2) 0.0690(17) 0.0063(14) 0.0345(13) 0.0025(12)
N1 0.0219(10) 0.0319(12) 0.0208(10) 0.0006(9) 0.0105(8) 0.0013(9)
N2 0.0214(11) 0.0553(17) 0.0213(10) 0.0030(10) 0.0113(9) 0.0050(11)
C2 0.0337(14) 0.0252(13) 0.0339(14) 0.0001(11) 0.0222(12) -0.0015(11)
C1 0.0338(16) 0.0438(18) 0.0405(16) 0.0017(14) 0.0227(14) -0.0002(14)
C3 0.0230(13) 0.067(2) 0.0341(15) 0.0032(14) 0.0182(12) 0.0052(14)
C4 0.0211(13) 0.058(2) 0.0323(14) 0.0056(14) 0.0095(11) 0.0037(13)
C5 0.0254(14) 0.064(2) 0.0215(12) 0.0062(13) 0.0069(11) 0.0057(14)
 
 
#----------------------------------------------------------------------------#
#                   MOLECULAR GEOMETRY                                       #
#----------------------------------------------------------------------------#
 
_geom_special_details
;
 All esds (except the esd in the dihedral angle between two l.s. planes)
 are estimated using the full covariance matrix.  The cell esds are taken
 into account individually in the estimation of esds in distances, angles
 and torsion angles; correlations between esds in cell parameters are only
 used when they are defined by crystal symmetry.  An approximate (isotropic)
 treatment of cell esds is used for estimating esds involving l.s. planes.
;
loop_
    _geom_bond_atom_site_label_1
    _geom_bond_atom_site_label_2
    _geom_bond_distance
    _geom_bond_site_symmetry_2
    _geom_bond_publ_flag
I1 Rh1 2.6623(3) . ?
Rh1 C1 1.838(3) . ?
Rh1 C2 1.862(3) . ?
Rh1 N1 2.099(2) . ?
O2 C2 1.134(3) . ?
O1 C1 1.133(4) . ?
N1 C5 1.335(3) . ?
N1 N2 1.341(3) . ?
N2 C3 1.332(4) . ?
N2 H2A 0.871(10) . ?
C3 C4 1.365(4) . ?
C3 H3 0.95 . ?
C4 C5 1.377(4) . ?
C4 H4 0.95 . ?
C5 H5 0.95 . ?
 
loop_
    _geom_angle_atom_site_label_1
    _geom_angle_atom_site_label_2
    _geom_angle_atom_site_label_3
    _geom_angle
    _geom_angle_site_symmetry_1
    _geom_angle_site_symmetry_3
    _geom_angle_publ_flag
C1 Rh1 C2 89.65(13) . . ?
C1 Rh1 N1 179.40(11) . . ?
C2 Rh1 N1 90.95(10) . . ?
C1 Rh1 I1 85.76(10) . . ?
C2 Rh1 I1 175.40(9) . . ?
N1 Rh1 I1 93.64(6) . . ?
C5 N1 N2 104.3(2) . . ?
C5 N1 Rh1 131.04(19) . . ?
N2 N1 Rh1 124.63(16) . . ?
C3 N2 N1 112.2(2) . . ?
C3 N2 H2A 131(2) . . ?
N1 N2 H2A 117(2) . . ?
O2 C2 Rh1 178.4(3) . . ?
O1 C1 Rh1 179.8(3) . . ?
N2 C3 C4 107.1(3) . . ?
N2 C3 H3 126.5 . . ?
C4 C3 H3 126.5 . . ?
C3 C4 C5 105.0(2) . . ?
C3 C4 H4 127.5 . . ?
C5 C4 H4 127.5 . . ?
N1 C5 C4 111.4(3) . . ?
N1 C5 H5 124.3 . . ?
C4 C5 H5 124.3 . . ?

#===END

data_4f

#----------------------------------------------------------------------------#
#                   CHEMICAL INFORMATION                                     #
#----------------------------------------------------------------------------#
 
_chemical_name_systematic
;
 ?
;
_chemical_formula_moiety                'C6 H6 I N2 O2 Rh'
_chemical_formula_sum                   'C6 H6 I N2 O2 Rh'
_chemical_formula_weight                367.94
_chemical_compound_source               'synthesis as described'
 
#----------------------------------------------------------------------------#
#                   UNIT CELL INFORMATION                                    #
#----------------------------------------------------------------------------#
 
_symmetry_cell_setting                  triclinic
_symmetry_space_group_name_H-M          'P -1'
_symmetry_space_group_name_Hall         '-P 1'
_symmetry_Int_Tables_number             2
loop_
    _symmetry_equiv_pos_as_xyz
'x, y, z'
'-x, -y, -z'
 
_cell_length_a                          8.1648(4)
_cell_length_b                          9.3741(4)
_cell_length_c                          14.6087(7)
_cell_angle_alpha                       86.941(4)
_cell_angle_beta                        85.400(4)
_cell_angle_gamma                       64.642(5)
_cell_volume                            1006.91(9)
_cell_formula_units_Z                   4
_cell_measurement_temperature           180(2)
_cell_measurement_reflns_used           5201
_cell_measurement_theta_min             3.6448
_cell_measurement_theta_max             28.5961
_cell_measurement_wavelength            0.71073
 
#----------------------------------------------------------------------------#
#                   CRYSTAL INFORMATION                                      #
#----------------------------------------------------------------------------#
 
_exptl_crystal_description              block
_exptl_crystal_colour                   yellow
_exptl_crystal_size_max                 0.18
_exptl_crystal_size_mid                 0.12
_exptl_crystal_size_min                 0.08
_exptl_crystal_density_diffrn           2.427
_exptl_crystal_density_method           'not measured'
_exptl_crystal_F_000                    680
_exptl_special_details
;
 ?
;
 
#----------------------------------------------------------------------------#
#                   ABSORPTION CORRECTION                                    #
#----------------------------------------------------------------------------#
 
_exptl_absorpt_coefficient_mu           4.726
_exptl_absorpt_correction_type          multi-scan
_exptl_absorpt_process_details
;
        CrysAlisPro, Oxford Diffraction Ltd.,
Version 1.171.33.66 (release 28-04-2010 CrysAlis171 .NET)
(compiled Apr 28 2010,14:27:37)
Empirical absorption correction using spherical harmonics,
 implemented in SCALE3 ABSPACK scaling algorithm.
;
_exptl_absorpt_correction_T_min         0.510
_exptl_absorpt_correction_T_max         0.695
 
 
#----------------------------------------------------------------------------#
#                   DATA COLLECTION                                          #
#----------------------------------------------------------------------------#
 
_diffrn_ambient_temperature             180(2)
_diffrn_radiation_wavelength            0.71073
_diffrn_radiation_type                  MoK\a
_diffrn_radiation_source          'Enhance (Mo) X-ray Source'
_diffrn_radiation_monochromator   'graphite'
_diffrn_measurement_device_type   'Xcalibur, Eos, Gemini ultra'
_diffrn_measurement_method        \w-\f
_diffrn_standards_number          0
_diffrn_standards_interval_count  0
_diffrn_standards_interval_time   0
_diffrn_standards_decay_%         0
_diffrn_radiation_probe                 x-ray
_diffrn_reflns_av_R_equivalents         0.0356
_diffrn_reflns_av_unetI/netI            0.0305
_diffrn_reflns_number                   15125
_diffrn_reflns_limit_h_min              -9
_diffrn_reflns_limit_h_max              9
_diffrn_reflns_limit_k_min              -11
_diffrn_reflns_limit_k_max              11
_diffrn_reflns_limit_l_min              -17
_diffrn_reflns_limit_l_max              17
_diffrn_reflns_theta_min                3.65
_diffrn_reflns_theta_max                25.35
_diffrn_reflns_theta_full               25.35
_diffrn_measured_fraction_theta_full
                                        0.997
_diffrn_measured_fraction_theta_max
                                        0.997
_reflns_number_total                    3675
_reflns_number_gt                       3143
_reflns_threshold_expression            >2sigma(I)
 
#----------------------------------------------------------------------------#
#                   COMPUTER PROGRAMS USED                                   #
#----------------------------------------------------------------------------#

_computing_data_collection              'CrysAlisPro, Oxford Diffraction Ltd.'
_computing_cell_refinement              'CrysAlisPro, Oxford Diffraction Ltd.'
_computing_data_reduction               'CrysAlisPro, Oxford Diffraction Ltd.' 
_computing_structure_solution           'SIR92 (Giacovazzo et al, 1993)'
_computing_structure_refinement         'SHELXL-97 (Sheldrick, 1997)'
_computing_molecular_graphics           'Ortep-3 for Windows (Farrugia, 1997)'
_computing_publication_material
                                   'WinGX publication routines (Farrugia, 1999)'
 
#----------------------------------------------------------------------------#
#                   STRUCTURE SOLUTION
#----------------------------------------------------------------------------#
 
_atom_sites_solution_primary            direct
_atom_sites_solution_secondary          difmap
_atom_sites_solution_hydrogens          geom
 
#----------------------------------------------------------------------------#
#                   REFINEMENT INFORMATION                                   #
#----------------------------------------------------------------------------#
 
_refine_special_details
;
 Refinement of F^2^ against ALL reflections.  The weighted R-factor wR and
 goodness of fit S are based on F^2^, conventional R-factors R are based
 on F, with F set to zero for negative F^2^. The threshold expression of
 F^2^ > 2sigma(F^2^) is used only for calculating R-factors(gt) etc. and is
 not relevant to the choice of reflections for refinement.  R-factors based
 on F^2^ are statistically about twice as large as those based on F, and R-
 factors based on ALL data will be even larger.
;
_refine_ls_structure_factor_coef        Fsqd
_refine_ls_matrix_type                  full
_refine_ls_weighting_scheme             calc
_refine_ls_weighting_details
         'calc w=1/[\s^2^(Fo^2^)+(0.0218P)^2^+0.1913P] where P=(Fo^2^+2Fc^2^)/3'
_refine_ls_hydrogen_treatment           constr
_refine_ls_extinction_method            none
_refine_ls_number_reflns                3675
_refine_ls_number_parameters            219
_refine_ls_number_restraints            0
_refine_ls_R_factor_all                 0.0321
_refine_ls_R_factor_gt                  0.0238
_refine_ls_wR_factor_ref                0.0521
_refine_ls_wR_factor_gt                 0.049
_refine_ls_goodness_of_fit_ref          1.034
_refine_ls_restrained_S_all             1.034
_refine_ls_shift/su_max                 0.001
_refine_ls_shift/su_mean                0
_refine_diff_density_max                0.571
_refine_diff_density_min                -0.449
_refine_diff_density_rms                0.1
 
#----------------------------------------------------------------------------#
#                   ATOMIC TYPES, COORDINATES AND THERMAL PARAMETERS         #
#----------------------------------------------------------------------------#
 
loop_
    _atom_type_symbol
    _atom_type_description
    _atom_type_scat_dispersion_real
    _atom_type_scat_dispersion_imag
    _atom_type_scat_source
C C 0.0033 0.0016 'International Tables Vol C Tables 4.2.6.8 and 6.1.1.4'
H H 0 0 'International Tables Vol C Tables 4.2.6.8 and 6.1.1.4'
O O 0.0106 0.006 'International Tables Vol C Tables 4.2.6.8 and 6.1.1.4'
Rh Rh -1.1178 0.9187 'International Tables Vol C Tables 4.2.6.8 and 6.1.1.4'
I I -0.4742 1.8119 'International Tables Vol C Tables 4.2.6.8 and 6.1.1.4'
N N 0.0061 0.0033 'International Tables Vol C Tables 4.2.6.8 and 6.1.1.4'
 
loop_
    _atom_site_label
    _atom_site_type_symbol
    _atom_site_fract_x
    _atom_site_fract_y
    _atom_site_fract_z
    _atom_site_U_iso_or_equiv
    _atom_site_adp_type
    _atom_site_occupancy
    _atom_site_symmetry_multiplicity
    _atom_site_calc_flag
    _atom_site_refinement_flags
    _atom_site_disorder_assembly
    _atom_site_disorder_group
C1 C 0.2414(6) 0.5312(5) 0.6132(3) 0.0370(10) Uani 1 1 d . . .
C2 C -0.0283(6) 0.6033(5) 0.7382(3) 0.0356(10) Uani 1 1 d . . .
C3 C -0.5570(6) 0.9764(5) 0.6106(3) 0.0394(11) Uani 1 1 d . . .
H3 H -0.6484 1.0816 0.6146 0.047 Uiso 1 1 calc R . .
C4 C -0.5848(6) 0.8475(5) 0.5936(3) 0.0396(10) Uani 1 1 d . . .
H4 H -0.6967 0.8438 0.584 0.047 Uiso 1 1 calc R . .
C5 C -0.4134(6) 0.7225(5) 0.5936(3) 0.0350(10) Uani 1 1 d . . .
H5 H -0.3884 0.6156 0.5835 0.042 Uiso 1 1 calc R . .
C6 C -0.2875(7) 1.0256(5) 0.6404(3) 0.0478(12) Uani 1 1 d . . .
H6A H -0.3686 1.1377 0.6319 0.072 Uiso 1 1 calc R . .
H6B H -0.1788 0.998 0.5987 0.072 Uiso 1 1 calc R . .
H6C H -0.2522 1.0053 0.704 0.072 Uiso 1 1 calc R . .
C7 C 1.1129(6) -0.0817(5) 0.8220(3) 0.0367(10) Uani 1 1 d . . .
C8 C 1.1515(6) 0.1825(5) 0.8195(3) 0.0395(10) Uani 1 1 d . . .
C9 C 0.6118(6) 0.5887(5) 0.9360(3) 0.0381(10) Uani 1 1 d . . .
H9 H 0.5104 0.6858 0.9246 0.046 Uiso 1 1 calc R . .
C10 C 0.7208(6) 0.5550(5) 1.0077(3) 0.0418(11) Uani 1 1 d . . .
H10 H 0.7102 0.6232 1.0558 0.05 Uiso 1 1 calc R . .
C11 C 0.8498(6) 0.4011(5) 0.9959(3) 0.0357(10) Uani 1 1 d . . .
H11 H 0.9453 0.3458 1.0353 0.043 Uiso 1 1 calc R . .
C12 C 0.6047(6) 0.4374(5) 0.8010(3) 0.0434(11) Uani 1 1 d . . .
H12A H 0.508 0.5378 0.7816 0.065 Uiso 1 1 calc R . .
H12B H 0.5559 0.3585 0.812 0.065 Uiso 1 1 calc R . .
H12C H 0.7031 0.401 0.7527 0.065 Uiso 1 1 calc R . .
O1 O 0.3938(4) 0.4590(4) 0.6147(2) 0.0536(9) Uani 1 1 d . . .
O2 O -0.0341(5) 0.5763(4) 0.8140(2) 0.0533(9) Uani 1 1 d . . .
O7 O 1.1989(5) -0.2052(4) 0.7962(2) 0.0537(9) Uani 1 1 d . . .
O8 O 1.2609(5) 0.2201(4) 0.7902(2) 0.0530(8) Uani 1 1 d . . .
Rh2 Rh 0.97597(4) 0.11829(4) 0.86573(2) 0.03151(9) Uani 1 1 d . . .
Rh1 Rh -0.00646(4) 0.64447(4) 0.61331(2) 0.02963(9) Uani 1 1 d . . .
I1 I 0.04009(4) 0.72059(3) 0.438259(18) 0.03543(8) Uani 1 1 d . . .
I2 I 0.72525(4) 0.01977(3) 0.925820(19) 0.04162(9) Uani 1 1 d . . .
N1 N -0.2889(4) 0.7729(4) 0.6098(2) 0.0289(7) Uani 1 1 d . . .
N2 N -0.3802(5) 0.9311(4) 0.6206(2) 0.0317(8) Uani 1 1 d . . .
N3 N 0.8204(5) 0.3421(4) 0.9211(2) 0.0323(8) Uani 1 1 d . . .
N4 N 0.6742(5) 0.4592(4) 0.8847(2) 0.0332(8) Uani 1 1 d . . .
 
loop_
    _atom_site_aniso_label
    _atom_site_aniso_U_11
    _atom_site_aniso_U_22
    _atom_site_aniso_U_33
    _atom_site_aniso_U_23
    _atom_site_aniso_U_13
    _atom_site_aniso_U_12
C1 0.033(3) 0.041(3) 0.036(2) -0.0036(19) -0.004(2) -0.015(2)
C2 0.032(3) 0.031(2) 0.044(3) -0.0003(19) -0.007(2) -0.013(2)
C3 0.032(3) 0.037(3) 0.036(2) -0.0011(18) 0.0006(19) -0.002(2)
C4 0.025(3) 0.049(3) 0.040(2) 0.002(2) -0.0013(19) -0.010(2)
C5 0.028(3) 0.037(2) 0.038(2) 0.0017(18) 0.0001(19) -0.013(2)
C6 0.052(3) 0.035(3) 0.057(3) -0.007(2) -0.008(2) -0.017(2)
C7 0.032(3) 0.040(3) 0.037(2) -0.0034(19) -0.0012(19) -0.014(2)
C8 0.036(3) 0.035(2) 0.037(2) -0.0085(18) 0.001(2) -0.005(2)
C9 0.033(3) 0.031(2) 0.044(3) -0.0066(19) 0.006(2) -0.008(2)
C10 0.039(3) 0.040(3) 0.047(3) -0.018(2) 0.009(2) -0.018(2)
C11 0.036(3) 0.041(3) 0.031(2) -0.0021(18) -0.0010(18) -0.018(2)
C12 0.038(3) 0.045(3) 0.036(2) -0.0004(19) -0.012(2) -0.006(2)
O1 0.027(2) 0.059(2) 0.067(2) -0.0032(16) -0.0090(16) -0.0083(17)
O2 0.061(2) 0.062(2) 0.0364(19) 0.0081(15) -0.0031(16) -0.0274(19)
O7 0.048(2) 0.0354(19) 0.066(2) -0.0147(16) 0.0097(17) -0.0077(16)
O8 0.042(2) 0.057(2) 0.062(2) -0.0149(16) 0.0085(17) -0.0235(18)
Rh2 0.0268(2) 0.03005(18) 0.03191(18) -0.00451(13) -0.00155(14) -0.00626(15)
Rh1 0.02263(19) 0.03078(18) 0.03323(18) -0.00074(13) -0.00461(13) -0.00874(14)
I1 0.02862(17) 0.03780(16) 0.03568(16) 0.00088(11) -0.00020(12) -0.01065(13)
I2 0.03697(19) 0.03831(17) 0.04687(18) -0.00105(12) 0.00185(13) -0.01421(14)
N1 0.0229(19) 0.0290(18) 0.0304(17) -0.0016(13) -0.0004(14) -0.0071(15)
N2 0.029(2) 0.0289(19) 0.0308(18) -0.0015(14) -0.0035(15) -0.0060(16)
N3 0.028(2) 0.0332(19) 0.0324(19) -0.0022(14) -0.0017(15) -0.0102(16)
N4 0.028(2) 0.0329(19) 0.0331(18) -0.0015(14) -0.0017(15) -0.0071(16)
 
 
#----------------------------------------------------------------------------#
#                   MOLECULAR GEOMETRY                                       #
#----------------------------------------------------------------------------#
 
_geom_special_details
;
 All esds (except the esd in the dihedral angle between two l.s. planes)
 are estimated using the full covariance matrix.  The cell esds are taken
 into account individually in the estimation of esds in distances, angles
 and torsion angles; correlations between esds in cell parameters are only
 used when they are defined by crystal symmetry.  An approximate (isotropic)
 treatment of cell esds is used for estimating esds involving l.s. planes.
;
loop_
    _geom_bond_atom_site_label_1
    _geom_bond_atom_site_label_2
    _geom_bond_distance
    _geom_bond_site_symmetry_2
    _geom_bond_publ_flag
C1 O1 1.135(5) . ?
C1 Rh1 1.839(5) . ?
C2 O2 1.125(5) . ?
C2 Rh1 1.855(4) . ?
C3 N2 1.337(5) . ?
C3 C4 1.360(6) . ?
C3 H3 0.95 . ?
C4 C5 1.388(6) . ?
C4 H4 0.95 . ?
C5 N1 1.332(5) . ?
C5 H5 0.95 . ?
C6 N2 1.441(5) . ?
C6 H6A 0.98 . ?
C6 H6B 0.98 . ?
C6 H6C 0.98 . ?
C7 O7 1.133(5) . ?
C7 Rh2 1.841(4) . ?
C8 O8 1.140(5) . ?
C8 Rh2 1.847(5) . ?
C9 N4 1.342(5) . ?
C9 C10 1.364(6) . ?
C9 H9 0.95 . ?
C10 C11 1.384(6) . ?
C10 H10 0.95 . ?
C11 N3 1.333(5) . ?
C11 H11 0.95 . ?
C12 N4 1.448(5) . ?
C12 H12A 0.98 . ?
C12 H12B 0.98 . ?
C12 H12C 0.98 . ?
Rh2 N3 2.099(3) . ?
Rh2 I2 2.6568(4) . ?
Rh1 N1 2.099(3) . ?
Rh1 I1 2.6599(4) . ?
N1 N2 1.357(4) . ?
N3 N4 1.353(4) . ?
 
loop_
    _geom_angle_atom_site_label_1
    _geom_angle_atom_site_label_2
    _geom_angle_atom_site_label_3
    _geom_angle
    _geom_angle_site_symmetry_1
    _geom_angle_site_symmetry_3
    _geom_angle_publ_flag
O1 C1 Rh1 178.4(4) . . ?
O2 C2 Rh1 177.2(4) . . ?
N2 C3 C4 109.0(4) . . ?
N2 C3 H3 125.5 . . ?
C4 C3 H3 125.5 . . ?
C3 C4 C5 104.6(4) . . ?
C3 C4 H4 127.7 . . ?
C5 C4 H4 127.7 . . ?
N1 C5 C4 110.7(4) . . ?
N1 C5 H5 124.6 . . ?
C4 C5 H5 124.6 . . ?
N2 C6 H6A 109.5 . . ?
N2 C6 H6B 109.5 . . ?
H6A C6 H6B 109.5 . . ?
N2 C6 H6C 109.5 . . ?
H6A C6 H6C 109.5 . . ?
H6B C6 H6C 109.5 . . ?
O7 C7 Rh2 178.9(4) . . ?
O8 C8 Rh2 179.0(4) . . ?
N4 C9 C10 107.3(4) . . ?
N4 C9 H9 126.3 . . ?
C10 C9 H9 126.3 . . ?
C9 C10 C11 106.0(4) . . ?
C9 C10 H10 127 . . ?
C11 C10 H10 127 . . ?
N3 C11 C10 110.0(4) . . ?
N3 C11 H11 125 . . ?
C10 C11 H11 125 . . ?
N4 C12 H12A 109.5 . . ?
N4 C12 H12B 109.5 . . ?
H12A C12 H12B 109.5 . . ?
N4 C12 H12C 109.5 . . ?
H12A C12 H12C 109.5 . . ?
H12B C12 H12C 109.5 . . ?
C7 Rh2 C8 90.73(18) . . ?
C7 Rh2 N3 177.59(15) . . ?
C8 Rh2 N3 90.48(15) . . ?
C7 Rh2 I2 87.54(13) . . ?
C8 Rh2 I2 177.64(12) . . ?
N3 Rh2 I2 91.31(9) . . ?
C1 Rh1 C2 90.22(18) . . ?
C1 Rh1 N1 178.54(15) . . ?
C2 Rh1 N1 91.14(16) . . ?
C1 Rh1 I1 87.78(13) . . ?
C2 Rh1 I1 174.55(12) . . ?
N1 Rh1 I1 90.91(8) . . ?
C5 N1 N2 105.9(3) . . ?
C5 N1 Rh1 129.1(3) . . ?
N2 N1 Rh1 124.9(2) . . ?
C3 N2 N1 109.7(3) . . ?
C3 N2 C6 129.0(4) . . ?
N1 N2 C6 121.3(3) . . ?
C11 N3 N4 106.0(3) . . ?
C11 N3 Rh2 127.6(3) . . ?
N4 N3 Rh2 126.4(2) . . ?
C9 N4 N3 110.7(3) . . ?
C9 N4 C12 128.1(4) . . ?
N3 N4 C12 121.2(3) . . ?

#===END

data_6d2

#----------------------------------------------------------------------------#
#                   CHEMICAL INFORMATION                                     #
#----------------------------------------------------------------------------#
 
_chemical_name_systematic
;
 ?
;
_chemical_formula_moiety                'C14 H18 I4 N4 O4 Rh2'
_chemical_formula_sum                   'C14 H18 I4 N4 O4 Rh2'
_chemical_formula_weight                1019.74
_chemical_compound_source               'synthesis as described'
_chemical_absolute_configuration        ad
 
#----------------------------------------------------------------------------#
#                   UNIT CELL INFORMATION                                    #
#----------------------------------------------------------------------------#
 
_symmetry_cell_setting                  orthorhombic
_symmetry_space_group_name_H-M          'P n a 21'
_symmetry_space_group_name_Hall         'P 2c -2n'
_symmetry_Int_Tables_number             33
loop_
    _symmetry_equiv_pos_as_xyz
'x, y, z'
'-x, -y, z+1/2'
'x+1/2, -y+1/2, z'
'-x+1/2, y+1/2, z+1/2'
 
_cell_length_a                          15.9689(2)
_cell_length_b                          20.4498(3)
_cell_length_c                          7.52620(10)
_cell_angle_alpha                       90
_cell_angle_beta                        90
_cell_angle_gamma                       90
_cell_volume                            2457.76(6)
_cell_formula_units_Z                   4
_cell_measurement_temperature           180(2)
_cell_measurement_reflns_used           16049
_cell_measurement_theta_min             3.3543
_cell_measurement_theta_max             29.2007
_cell_measurement_wavelength            0.71073
 
#----------------------------------------------------------------------------#
#                   CRYSTAL INFORMATION                                      #
#----------------------------------------------------------------------------#
 
_exptl_crystal_description              block
_exptl_crystal_colour                   orange
_exptl_crystal_size_max                 0.375
_exptl_crystal_size_mid                 0.225
_exptl_crystal_size_min                 0.1
_exptl_crystal_density_diffrn           2.756
_exptl_crystal_density_method           'not measured'
_exptl_crystal_F_000                    1856
_exptl_special_details
;
 ?
;
 
#----------------------------------------------------------------------------#
#                   ABSORPTION CORRECTION                                    #
#----------------------------------------------------------------------------#
 
_exptl_absorpt_coefficient_mu           6.393
_exptl_absorpt_correction_type          multi-scan
_exptl_absorpt_process_details
;
        CrysAlisPro, Oxford Diffraction Ltd.,
Version 1.171.33.66 (release 28-04-2010 CrysAlis171 .NET)
(compiled Apr 28 2010,14:27:37)
Empirical absorption correction using spherical harmonics,
 implemented in SCALE3 ABSPACK scaling algorithm.
;
_exptl_absorpt_correction_T_min         0.200
_exptl_absorpt_correction_T_max         0.528
 
#----------------------------------------------------------------------------#
#                   DATA COLLECTION                                          #
#----------------------------------------------------------------------------#
 
_diffrn_ambient_temperature             180(2)
_diffrn_radiation_wavelength            0.71073
_diffrn_radiation_type                  MoK\a
_diffrn_radiation_source          'Enhance (Mo) X-ray Source'
_diffrn_radiation_monochromator   'graphite'
_diffrn_measurement_device_type   'Xcalibur, Eos, Gemini ultra'
_diffrn_measurement_method        \w-\f
_diffrn_standards_number          0
_diffrn_standards_interval_count  0
_diffrn_standards_interval_time   0
_diffrn_standards_decay_%         0
_diffrn_radiation_probe                 x-ray
_diffrn_reflns_av_R_equivalents         0.0253
_diffrn_reflns_av_unetI/netI            0.0166
_diffrn_reflns_number                   23523
_diffrn_reflns_limit_h_min              -19
_diffrn_reflns_limit_h_max              19
_diffrn_reflns_limit_k_min              -24
_diffrn_reflns_limit_k_max              24
_diffrn_reflns_limit_l_min              -9
_diffrn_reflns_limit_l_max              9
_diffrn_reflns_theta_min                3.6
_diffrn_reflns_theta_max                25.35
_diffrn_reflns_theta_full               25.35
_diffrn_measured_fraction_theta_full
                                        0.996
_diffrn_measured_fraction_theta_max
                                        0.996
_reflns_number_total                    4494
_reflns_number_gt                       4456
_reflns_threshold_expression            >2sigma(I)
 
#----------------------------------------------------------------------------#
#                   COMPUTER PROGRAMS USED                                   #
#----------------------------------------------------------------------------#
 
_computing_data_collection              'CrysAlisPro, Oxford Diffraction Ltd.'
_computing_cell_refinement              'CrysAlisPro, Oxford Diffraction Ltd.'
_computing_data_reduction               'CrysAlisPro, Oxford Diffraction Ltd.' 
_computing_structure_solution           'SIR92 (Giacovazzo et al, 1993)'
_computing_structure_refinement         'SHELXL-97 (Sheldrick, 1997)'
_computing_molecular_graphics           'Ortep-3 for Windows (Farrugia, 1997)'
_computing_publication_material
                                   'WinGX publication routines (Farrugia, 1999)'
 
#----------------------------------------------------------------------------#
#                   STRUCTURE SOLUTION
#----------------------------------------------------------------------------#
 
_atom_sites_solution_primary            direct
_atom_sites_solution_secondary          difmap
_atom_sites_solution_hydrogens          geom
 
#----------------------------------------------------------------------------#
#                   REFINEMENT INFORMATION                                   #
#----------------------------------------------------------------------------#
 
_refine_special_details
;
 Refinement of F^2^ against ALL reflections.  The weighted R-factor wR and
 goodness of fit S are based on F^2^, conventional R-factors R are based
 on F, with F set to zero for negative F^2^. The threshold expression of
 F^2^ > 2sigma(F^2^) is used only for calculating R-factors(gt) etc. and is
 not relevant to the choice of reflections for refinement.  R-factors based
 on F^2^ are statistically about twice as large as those based on F, and R-
 factors based on ALL data will be even larger.
;
_refine_ls_structure_factor_coef        Fsqd
_refine_ls_matrix_type                  full
_refine_ls_weighting_scheme             calc
_refine_ls_weighting_details
         'calc w=1/[\s^2^(Fo^2^)+(0.0388P)^2^+3.6754P] where P=(Fo^2^+2Fc^2^)/3'
_refine_ls_hydrogen_treatment           constr
_refine_ls_extinction_method            SHELXL
_refine_ls_extinction_expression
                                    Fc^*^=kFc[1+0.001xFc^2^\l^3^/sin(2\q)]^-1/4^
_refine_ls_extinction_coef              0.00249(9)
_refine_ls_number_reflns                4494
_refine_ls_number_parameters            259
_refine_ls_number_restraints            1
_refine_ls_R_factor_all                 0.0221
_refine_ls_R_factor_gt                  0.0219
_refine_ls_wR_factor_ref                0.0551
_refine_ls_wR_factor_gt                 0.055
_refine_ls_goodness_of_fit_ref          1.048
_refine_ls_restrained_S_all             1.048
_refine_ls_shift/su_max                 0.005
_refine_ls_shift/su_mean                0
_refine_ls_abs_structure_details
                                    'Flack H D (1983), Acta Cryst. A39, 876-881'
_refine_ls_abs_structure_Flack          0.00(2)
_refine_diff_density_max                0.918
_refine_diff_density_min                -0.423
_refine_diff_density_rms                0.102
 
#----------------------------------------------------------------------------#
#                   ATOMIC TYPES, COORDINATES AND THERMAL PARAMETERS         #
#----------------------------------------------------------------------------#
 
loop_
    _atom_type_symbol
    _atom_type_description
    _atom_type_scat_dispersion_real
    _atom_type_scat_dispersion_imag
    _atom_type_scat_source
C C 0.0033 0.0016 'International Tables Vol C Tables 4.2.6.8 and 6.1.1.4'
H H 0 0 'International Tables Vol C Tables 4.2.6.8 and 6.1.1.4'
N N 0.0061 0.0033 'International Tables Vol C Tables 4.2.6.8 and 6.1.1.4'
O O 0.0106 0.006 'International Tables Vol C Tables 4.2.6.8 and 6.1.1.4'
Rh Rh -1.1178 0.9187 'International Tables Vol C Tables 4.2.6.8 and 6.1.1.4'
I I -0.4742 1.8119 'International Tables Vol C Tables 4.2.6.8 and 6.1.1.4'
 
loop_
    _atom_site_label
    _atom_site_type_symbol
    _atom_site_fract_x
    _atom_site_fract_y
    _atom_site_fract_z
    _atom_site_U_iso_or_equiv
    _atom_site_adp_type
    _atom_site_occupancy
    _atom_site_symmetry_multiplicity
    _atom_site_calc_flag
    _atom_site_refinement_flags
    _atom_site_disorder_assembly
    _atom_site_disorder_group
C1 C 0.4416(4) 0.3743(3) 0.3557(8) 0.0235(12) Uani 1 1 d . . .
C2 C 0.2153(3) 0.4081(3) -0.0698(8) 0.0211(11) Uani 1 1 d . . .
H2 H 0.2376 0.451 -0.0789 0.025 Uiso 1 1 calc R . .
C4 C 0.1387(4) 0.3215(3) -0.1183(8) 0.0258(12) Uani 1 1 d . . .
H4 H 0.0981 0.2925 -0.1661 0.031 Uiso 1 1 calc R . .
C5 C 0.1944(3) 0.3085(3) 0.0104(8) 0.0237(11) Uani 1 1 d . . .
H5 H 0.1996 0.268 0.071 0.028 Uiso 1 1 calc R . .
C3 C 0.1062(4) 0.4225(3) -0.3031(9) 0.0342(14) Uani 1 1 d . . .
H3A H 0.1209 0.4689 -0.2947 0.051 Uiso 1 1 calc R . .
H3B H 0.0459 0.4172 -0.2842 0.051 Uiso 1 1 calc R . .
H3C H 0.1212 0.406 -0.4211 0.051 Uiso 1 1 calc R . .
C9 C 0.2878(3) 0.4443(3) 0.3519(8) 0.0236(12) Uani 1 1 d . . .
C10 C 0.3278(4) 0.4682(3) 0.5203(10) 0.0339(13) Uani 1 1 d . . .
H10A H 0.2913 0.5007 0.5767 0.051 Uiso 1 1 calc R . .
H10B H 0.382 0.4882 0.4927 0.051 Uiso 1 1 calc R . .
H10C H 0.3362 0.4313 0.6014 0.051 Uiso 1 1 calc R . .
C11 C 0.4777(4) 0.2016(3) 0.3888(8) 0.0259(12) Uani 1 1 d . . .
C8 C 0.2587(4) 0.1468(3) -0.0415(7) 0.0229(12) Uani 1 1 d . . .
H8 H 0.301 0.1505 -0.1298 0.027 Uiso 1 1 calc R . .
C7 C 0.1363(4) 0.1355(3) 0.0849(8) 0.0247(13) Uani 1 1 d . . .
H7 H 0.078 0.13 0.1043 0.03 Uiso 1 1 calc R . .
C6 C 0.1960(3) 0.1411(2) 0.2102(8) 0.0225(11) Uani 1 1 d . . .
H6 H 0.1864 0.1402 0.3347 0.027 Uiso 1 1 calc R . .
C14 C 0.1370(4) 0.1370(4) -0.2496(9) 0.0378(16) Uani 1 1 d . . .
H14A H 0.0783 0.1505 -0.2395 0.057 Uiso 1 1 calc R . .
H14B H 0.1397 0.0922 -0.2959 0.057 Uiso 1 1 calc R . .
H14C H 0.1665 0.1665 -0.3309 0.057 Uiso 1 1 calc R . .
C12 C 0.4521(4) 0.1041(3) 0.1261(8) 0.0226(11) Uani 1 1 d . . .
C13 C 0.5337(4) 0.0809(3) 0.2059(9) 0.0292(13) Uani 1 1 d . . .
H13A H 0.5565 0.0452 0.1335 0.044 Uiso 1 1 calc R . .
H13B H 0.5238 0.0652 0.3271 0.044 Uiso 1 1 calc R . .
H13C H 0.5738 0.1171 0.2087 0.044 Uiso 1 1 calc R . .
N1 N 0.2429(3) 0.36283(19) 0.0413(6) 0.0189(9) Uani 1 1 d . . .
N2 N 0.1523(3) 0.3855(2) -0.1666(6) 0.0224(10) Uani 1 1 d . . .
N3 N 0.2729(3) 0.1483(2) 0.1313(6) 0.0193(9) Uani 1 1 d . . .
N4 N 0.1762(3) 0.1394(2) -0.0762(7) 0.0227(10) Uani 1 1 d . . .
O1 O 0.5007(3) 0.3734(2) 0.4360(7) 0.0353(10) Uani 1 1 d . . .
O2 O 0.2231(3) 0.4660(2) 0.2983(7) 0.0462(13) Uani 1 1 d . . .
O3 O 0.5319(3) 0.2201(2) 0.4722(7) 0.0422(12) Uani 1 1 d . . .
O4 O 0.4249(3) 0.0840(2) -0.0081(7) 0.0401(12) Uani 1 1 d . . .
Rh1 Rh 0.34597(2) 0.371532(18) 0.21435(6) 0.01556(9) Uani 1 1 d . . .
Rh2 Rh 0.38520(2) 0.173863(18) 0.25906(6) 0.01577(10) Uani 1 1 d . . .
I1 I 0.41952(2) 0.461253(16) 0.01101(6) 0.02534(9) Uani 1 1 d . . .
I2 I 0.28686(2) 0.283019(16) 0.44502(5) 0.02243(9) Uani 1 1 d . . .
I3 I 0.422171(19) 0.263065(15) 0.01034(5) 0.02031(9) Uani 1 1 d . . .
I4 I 0.35477(2) 0.088382(16) 0.51381(5) 0.02466(10) Uani 1 1 d . . .
 
loop_
    _atom_site_aniso_label
    _atom_site_aniso_U_11
    _atom_site_aniso_U_22
    _atom_site_aniso_U_33
    _atom_site_aniso_U_23
    _atom_site_aniso_U_13
    _atom_site_aniso_U_12
C1 0.024(3) 0.021(3) 0.026(3) -0.002(2) -0.003(2) -0.001(2)
C2 0.017(2) 0.025(3) 0.022(3) 0.001(2) 0.000(2) 0.000(2)
C4 0.024(3) 0.025(3) 0.029(3) -0.003(2) -0.004(2) -0.005(2)
C5 0.025(3) 0.016(2) 0.030(3) 0.000(3) -0.002(3) -0.003(2)
C3 0.032(3) 0.041(3) 0.029(3) 0.008(3) -0.014(3) 0.002(3)
C9 0.026(3) 0.022(3) 0.023(3) 0.000(2) 0.002(2) -0.001(2)
C10 0.035(3) 0.032(3) 0.035(3) -0.012(3) -0.002(3) 0.000(2)
C11 0.026(3) 0.018(3) 0.034(3) 0.001(2) -0.001(3) 0.004(2)
C8 0.021(3) 0.026(3) 0.022(3) -0.006(2) 0.002(2) -0.002(2)
C7 0.016(3) 0.027(3) 0.031(3) -0.005(2) 0.000(2) -0.003(2)
C6 0.020(3) 0.027(3) 0.021(3) -0.001(2) 0.001(2) -0.001(2)
C14 0.030(3) 0.058(4) 0.026(4) -0.012(3) -0.012(3) 0.004(3)
C12 0.024(3) 0.022(3) 0.022(3) -0.001(2) 0.001(2) 0.005(2)
C13 0.025(3) 0.032(3) 0.031(3) 0.000(2) 0.002(3) 0.011(2)
N1 0.017(2) 0.019(2) 0.020(2) 0.0001(17) -0.0031(19) 0.0007(16)
N2 0.019(2) 0.030(2) 0.019(2) 0.001(2) -0.0053(19) -0.0002(19)
N3 0.019(2) 0.020(2) 0.018(2) -0.0046(18) 0.0013(19) 0.0020(18)
N4 0.019(2) 0.025(2) 0.024(3) -0.0055(19) -0.005(2) -0.0018(17)
O1 0.028(2) 0.038(2) 0.040(2) 0.001(2) -0.019(2) -0.0024(17)
O2 0.046(3) 0.050(3) 0.043(3) -0.017(2) -0.012(2) 0.027(2)
O3 0.034(2) 0.040(2) 0.053(3) -0.005(2) -0.025(2) -0.0026(19)
O4 0.042(3) 0.042(2) 0.037(3) -0.018(2) -0.009(2) 0.018(2)
Rh1 0.01446(18) 0.01532(18) 0.01689(19) 0.00046(15) -0.00237(15) -0.00069(14)
Rh2 0.01551(19) 0.01649(18) 0.01532(18) -0.00013(15) -0.00179(16) 0.00108(14)
I1 0.02074(17) 0.02335(17) 0.03193(19) 0.00801(16) -0.00159(15) -0.00461(12)
I2 0.02657(17) 0.01993(16) 0.02079(17) 0.00192(14) 0.00341(14) -0.00084(13)
I3 0.01925(16) 0.01990(16) 0.02177(16) 0.00223(14) 0.00330(14) 0.00094(12)
I4 0.02926(19) 0.02416(17) 0.02055(17) 0.00615(15) 0.00361(16) 0.00516(13)
 
 
#----------------------------------------------------------------------------#
#                   MOLECULAR GEOMETRY                                       #
#----------------------------------------------------------------------------#
 
_geom_special_details
;
 All esds (except the esd in the dihedral angle between two l.s. planes)
 are estimated using the full covariance matrix.  The cell esds are taken
 into account individually in the estimation of esds in distances, angles
 and torsion angles; correlations between esds in cell parameters are only
 used when they are defined by crystal symmetry.  An approximate (isotropic)
 treatment of cell esds is used for estimating esds involving l.s. planes.
;
loop_
    _geom_bond_atom_site_label_1
    _geom_bond_atom_site_label_2
    _geom_bond_distance
    _geom_bond_site_symmetry_2
    _geom_bond_publ_flag
C1 O1 1.120(7) . ?
C1 Rh1 1.863(6) . ?
C2 N1 1.323(7) . ?
C2 N2 1.325(7) . ?
C2 H2 0.95 . ?
C4 C5 1.342(8) . ?
C4 N2 1.376(7) . ?
C4 H4 0.95 . ?
C5 N1 1.373(7) . ?
C5 H5 0.95 . ?
C3 N2 1.472(7) . ?
C3 H3A 0.98 . ?
C3 H3B 0.98 . ?
C3 H3C 0.98 . ?
C9 O2 1.194(7) . ?
C9 C10 1.501(9) . ?
C9 Rh1 2.037(6) . ?
C10 H10A 0.98 . ?
C10 H10B 0.98 . ?
C10 H10C 0.98 . ?
C11 O3 1.133(7) . ?
C11 Rh2 1.860(6) . ?
C8 N3 1.321(8) . ?
C8 N4 1.352(7) . ?
C8 H8 0.95 . ?
C7 C6 1.346(9) . ?
C7 N4 1.372(8) . ?
C7 H7 0.95 . ?
C6 N3 1.371(7) . ?
C6 H6 0.95 . ?
C14 N4 1.449(8) . ?
C14 H14A 0.98 . ?
C14 H14B 0.98 . ?
C14 H14C 0.98 . ?
C12 O4 1.174(7) . ?
C12 C13 1.512(8) . ?
C12 Rh2 2.044(5) . ?
C13 H13A 0.98 . ?
C13 H13B 0.98 . ?
C13 H13C 0.98 . ?
N1 Rh1 2.106(4) . ?
N3 Rh2 2.101(5) . ?
Rh1 I1 2.6624(5) . ?
Rh1 I2 2.6797(5) . ?
Rh1 I3 2.9595(5) . ?
Rh2 I4 2.6397(5) . ?
Rh2 I3 2.6796(5) . ?
Rh2 I2 3.0672(5) . ?
 
loop_
    _geom_angle_atom_site_label_1
    _geom_angle_atom_site_label_2
    _geom_angle_atom_site_label_3
    _geom_angle
    _geom_angle_site_symmetry_1
    _geom_angle_site_symmetry_3
    _geom_angle_publ_flag
O1 C1 Rh1 176.5(5) . . ?
N1 C2 N2 110.9(5) . . ?
N1 C2 H2 124.5 . . ?
N2 C2 H2 124.5 . . ?
C5 C4 N2 105.9(5) . . ?
C5 C4 H4 127 . . ?
N2 C4 H4 127 . . ?
C4 C5 N1 109.6(5) . . ?
C4 C5 H5 125.2 . . ?
N1 C5 H5 125.2 . . ?
N2 C3 H3A 109.5 . . ?
N2 C3 H3B 109.5 . . ?
H3A C3 H3B 109.5 . . ?
N2 C3 H3C 109.5 . . ?
H3A C3 H3C 109.5 . . ?
H3B C3 H3C 109.5 . . ?
O2 C9 C10 122.2(5) . . ?
O2 C9 Rh1 119.6(5) . . ?
C10 C9 Rh1 118.2(4) . . ?
C9 C10 H10A 109.5 . . ?
C9 C10 H10B 109.5 . . ?
H10A C10 H10B 109.5 . . ?
C9 C10 H10C 109.5 . . ?
H10A C10 H10C 109.5 . . ?
H10B C10 H10C 109.5 . . ?
O3 C11 Rh2 177.1(5) . . ?
N3 C8 N4 111.1(5) . . ?
N3 C8 H8 124.4 . . ?
N4 C8 H8 124.4 . . ?
C6 C7 N4 106.6(5) . . ?
C6 C7 H7 126.7 . . ?
N4 C7 H7 126.7 . . ?
C7 C6 N3 109.9(5) . . ?
C7 C6 H6 125.1 . . ?
N3 C6 H6 125.1 . . ?
N4 C14 H14A 109.5 . . ?
N4 C14 H14B 109.5 . . ?
H14A C14 H14B 109.5 . . ?
N4 C14 H14C 109.5 . . ?
H14A C14 H14C 109.5 . . ?
H14B C14 H14C 109.5 . . ?
O4 C12 C13 123.4(5) . . ?
O4 C12 Rh2 118.2(4) . . ?
C13 C12 Rh2 118.4(4) . . ?
C12 C13 H13A 109.5 . . ?
C12 C13 H13B 109.5 . . ?
H13A C13 H13B 109.5 . . ?
C12 C13 H13C 109.5 . . ?
H13A C13 H13C 109.5 . . ?
H13B C13 H13C 109.5 . . ?
C2 N1 C5 105.7(5) . . ?
C2 N1 Rh1 126.3(3) . . ?
C5 N1 Rh1 127.8(4) . . ?
C2 N2 C4 107.8(5) . . ?
C2 N2 C3 125.7(5) . . ?
C4 N2 C3 126.5(5) . . ?
C8 N3 C6 105.7(5) . . ?
C8 N3 Rh2 127.1(4) . . ?
C6 N3 Rh2 126.3(4) . . ?
C8 N4 C7 106.7(5) . . ?
C8 N4 C14 126.8(5) . . ?
C7 N4 C14 126.4(5) . . ?
C1 Rh1 C9 93.5(2) . . ?
C1 Rh1 N1 175.3(2) . . ?
C9 Rh1 N1 91.1(2) . . ?
C1 Rh1 I1 86.89(18) . . ?
C9 Rh1 I1 89.43(16) . . ?
N1 Rh1 I1 92.71(12) . . ?
C1 Rh1 I2 86.52(18) . . ?
C9 Rh1 I2 90.20(16) . . ?
N1 Rh1 I2 93.93(12) . . ?
I1 Rh1 I2 173.36(2) . . ?
C1 Rh1 I3 88.95(18) . . ?
C9 Rh1 I3 177.15(16) . . ?
N1 Rh1 I3 86.39(12) . . ?
I1 Rh1 I3 92.113(16) . . ?
I2 Rh1 I3 88.549(14) . . ?
C11 Rh2 C12 93.1(2) . . ?
C11 Rh2 N3 173.9(2) . . ?
C12 Rh2 N3 92.8(2) . . ?
C11 Rh2 I4 88.11(18) . . ?
C12 Rh2 I4 89.43(16) . . ?
N3 Rh2 I4 90.61(13) . . ?
C11 Rh2 I3 89.08(18) . . ?
C12 Rh2 I3 91.01(16) . . ?
N3 Rh2 I3 92.16(13) . . ?
I4 Rh2 I3 177.18(2) . . ?
C11 Rh2 I2 86.83(17) . . ?
C12 Rh2 I2 177.34(16) . . ?
N3 Rh2 I2 87.30(12) . . ?
I4 Rh2 I2 93.226(15) . . ?
I3 Rh2 I2 86.338(13) . . ?
Rh1 I2 Rh2 90.897(14) . . ?
Rh2 I3 Rh1 93.279(16) . . ?

#===END

data_6d1

#----------------------------------------------------------------------------#
#                   CHEMICAL INFORMATION                                     #
#----------------------------------------------------------------------------#
 
_chemical_name_systematic
;
 ?
;
_chemical_formula_moiety                'C14 H18 I4 N4 O4 Rh2'
_chemical_formula_sum                   'C14 H18 I4 N4 O4 Rh2'
_chemical_formula_weight                1019.74
_chemical_compound_source               'synthesis as described'
 
#----------------------------------------------------------------------------#
#                   UNIT CELL INFORMATION                                    #
#----------------------------------------------------------------------------#
 
_symmetry_cell_setting                  triclinic
_symmetry_space_group_name_H-M          'P -1'
_symmetry_space_group_name_Hall         '-P 1'
_symmetry_Int_Tables_number             2
loop_
    _symmetry_equiv_pos_as_xyz
'x, y, z'
'-x, -y, -z'
 
_cell_length_a                          10.1933(15)
_cell_length_b                          11.5069(17)
_cell_length_c                          12.3739(18)
_cell_angle_alpha                       105.633(6)
_cell_angle_beta                        93.540(7)
_cell_angle_gamma                       112.887(5)
_cell_volume                            1264.8(3)
_cell_formula_units_Z                   2
_cell_measurement_temperature           180(2)
_cell_measurement_reflns_used           9619
_cell_measurement_theta_min             3.01
_cell_measurement_theta_max             30.61
_cell_measurement_wavelength            0.71073
 
#----------------------------------------------------------------------------#
#                   CRYSTAL INFORMATION                                      #
#----------------------------------------------------------------------------#
 
_exptl_crystal_description              block
_exptl_crystal_colour                   red
_exptl_crystal_size_max                 0.12
_exptl_crystal_size_mid                 0.08
_exptl_crystal_size_min                 0.08
_exptl_crystal_density_diffrn           2.678
_exptl_crystal_density_method           'not measured'
_exptl_crystal_F_000                    928
_exptl_special_details
;
 ?
;
 
#----------------------------------------------------------------------------#
#                   ABSORPTION CORRECTION                                    #
#----------------------------------------------------------------------------#
 
_exptl_absorpt_coefficient_mu           6.212
_exptl_absorpt_correction_type          multi-scan
_exptl_absorpt_process_details
;
        [c.f. r.h. blessing, acta cryst. (1995), a51, 33-38]
;
_exptl_absorpt_correction_T_min         0.5227
_exptl_absorpt_correction_T_max         0.6364
 
#----------------------------------------------------------------------------#
#                   DATA COLLECTION                                          #
#----------------------------------------------------------------------------#
 
_diffrn_ambient_temperature             180(2)
_diffrn_radiation_wavelength            0.71073
_diffrn_radiation_type                  MoK\a
_diffrn_radiation_source          'fine-focus sealed tube'
_diffrn_radiation_monochromator   graphite
_diffrn_measurement_device_type   'Bruker Kappa APEX II'
_diffrn_measurement_method        \w-\f
_diffrn_standards_number          0
_diffrn_standards_interval_count  0
_diffrn_standards_interval_time   0
_diffrn_standards_decay_%         0
_diffrn_radiation_probe                 x-ray
_diffrn_reflns_av_R_equivalents         0.0179
_diffrn_reflns_av_unetI/netI            0.0157
_diffrn_reflns_number                   30995
_diffrn_reflns_limit_h_min              -14
_diffrn_reflns_limit_h_max              14
_diffrn_reflns_limit_k_min              -16
_diffrn_reflns_limit_k_max              16
_diffrn_reflns_limit_l_min              -17
_diffrn_reflns_limit_l_max              17
_diffrn_reflns_theta_min                2.21
_diffrn_reflns_theta_max                30.66
_diffrn_reflns_theta_full               30.66
_diffrn_measured_fraction_theta_full
                                        0.989
_diffrn_measured_fraction_theta_max
                                        0.989
_reflns_number_total                    7757
_reflns_number_gt                       6927
_reflns_threshold_expression            >2sigma(I)
 
#----------------------------------------------------------------------------#
#                   COMPUTER PROGRAMS USED                                   #
#----------------------------------------------------------------------------#
 
_computing_data_collection              'Bruker SMART'
_computing_cell_refinement              'Bruker SMART'
_computing_data_reduction               'Bruker SAINT' 
_computing_structure_solution           'SHELXS-97 (Sheldrick, 1990)'
_computing_structure_refinement         'SHELXL-97 (Sheldrick, 1997)'
_computing_molecular_graphics           'Ortep-3 for Windows (Farrugia, 1997)'
_computing_publication_material
                                   'WinGX publication routines (Farrugia, 1999)'
 
#----------------------------------------------------------------------------#
#                   STRUCTURE SOLUTION
#----------------------------------------------------------------------------#
 
_atom_sites_solution_primary            direct
_atom_sites_solution_secondary          difmap
_atom_sites_solution_hydrogens          geom
 
#----------------------------------------------------------------------------#
#                   REFINEMENT INFORMATION                                   #
#----------------------------------------------------------------------------#
 
_refine_special_details
;
 Refinement of F^2^ against ALL reflections.  The weighted R-factor wR and
 goodness of fit S are based on F^2^, conventional R-factors R are based
 on F, with F set to zero for negative F^2^. The threshold expression of
 F^2^ > 2sigma(F^2^) is used only for calculating R-factors(gt) etc. and is
 not relevant to the choice of reflections for refinement.  R-factors based
 on F^2^ are statistically about twice as large as those based on F, and R-
 factors based on ALL data will be even larger.
;
_refine_ls_structure_factor_coef        Fsqd
_refine_ls_matrix_type                  full
_refine_ls_weighting_scheme             calc
_refine_ls_weighting_details
         'calc w=1/[\s^2^(Fo^2^)+(0.0319P)^2^+6.5935P] where P=(Fo^2^+2Fc^2^)/3'
_refine_ls_hydrogen_treatment           constr
_refine_ls_extinction_method            none
_refine_ls_number_reflns                7757
_refine_ls_number_parameters            257
_refine_ls_number_restraints            0
_refine_ls_R_factor_all                 0.0338
_refine_ls_R_factor_gt                  0.0287
_refine_ls_wR_factor_ref                0.0772
_refine_ls_wR_factor_gt                 0.0739
_refine_ls_goodness_of_fit_ref          1.041
_refine_ls_restrained_S_all             1.041
_refine_ls_shift/su_max                 0.003
_refine_ls_shift/su_mean                0
_refine_diff_density_max                3.675
_refine_diff_density_min                -1.93
_refine_diff_density_rms                0.16
 
#----------------------------------------------------------------------------#
#                   ATOMIC TYPES, COORDINATES AND THERMAL PARAMETERS         #
#----------------------------------------------------------------------------#
 
loop_
    _atom_type_symbol
    _atom_type_description
    _atom_type_scat_dispersion_real
    _atom_type_scat_dispersion_imag
    _atom_type_scat_source
C C 0.0033 0.0016 'International Tables Vol C Tables 4.2.6.8 and 6.1.1.4'
H H 0 0 'International Tables Vol C Tables 4.2.6.8 and 6.1.1.4'
N N 0.0061 0.0033 'International Tables Vol C Tables 4.2.6.8 and 6.1.1.4'
O O 0.0106 0.006 'International Tables Vol C Tables 4.2.6.8 and 6.1.1.4'
Rh Rh -1.1178 0.9187 'International Tables Vol C Tables 4.2.6.8 and 6.1.1.4'
I I -0.4742 1.8119 'International Tables Vol C Tables 4.2.6.8 and 6.1.1.4'
 
loop_
    _atom_site_label
    _atom_site_type_symbol
    _atom_site_fract_x
    _atom_site_fract_y
    _atom_site_fract_z
    _atom_site_U_iso_or_equiv
    _atom_site_adp_type
    _atom_site_occupancy
    _atom_site_symmetry_multiplicity
    _atom_site_calc_flag
    _atom_site_refinement_flags
    _atom_site_disorder_assembly
    _atom_site_disorder_group
Rh1 Rh 0.59616(3) 0.65868(3) 0.44827(2) 0.02135(6) Uani 1 1 d . . .
I2 I 0.30131(3) 0.44890(3) 0.41964(2) 0.02842(6) Uani 1 1 d . . .
Rh2 Rh 0.02540(3) 0.83982(3) 0.02083(2) 0.02034(6) Uani 1 1 d . . .
I3 I 0.16927(3) 1.10175(3) 0.12441(2) 0.02561(6) Uani 1 1 d . . .
I1 I 0.49203(4) 0.77576(3) 0.33065(3) 0.03650(7) Uani 1 1 d . . .
I4 I -0.12830(3) 0.58098(3) -0.08003(3) 0.03157(7) Uani 1 1 d . . .
N1 N 0.6320(4) 0.5425(3) 0.3005(3) 0.0239(6) Uani 1 1 d . . .
C9 C 0.8138(6) 0.8257(6) 0.4835(4) 0.0410(13) Uani 1 1 d . . .
N2 N 0.5894(4) 0.4071(4) 0.1261(3) 0.0274(7) Uani 1 1 d . . .
C4 C 0.7222(5) 0.4261(5) 0.1770(4) 0.0327(9) Uani 1 1 d . . .
H4 H 0.7839 0.3885 0.1436 0.039 Uiso 1 1 calc R . .
C5 C 0.7483(5) 0.5101(5) 0.2856(4) 0.0305(8) Uani 1 1 d . . .
H5 H 0.8326 0.5411 0.3418 0.037 Uiso 1 1 calc R . .
C1 C 0.5492(5) 0.7474(5) 0.5779(4) 0.0356(10) Uani 1 1 d . . .
C2 C 0.5382(4) 0.4775(4) 0.2024(3) 0.0256(7) Uani 1 1 d . . .
H2 H 0.447 0.4803 0.1882 0.031 Uiso 1 1 calc R . .
O1 O 0.5153(5) 0.7954(5) 0.6559(3) 0.0580(12) Uani 1 1 d . . .
N3 N 0.1584(4) 0.8500(3) -0.1030(3) 0.0244(6) Uani 1 1 d . . .
N4 N 0.2182(4) 0.8406(4) -0.2715(3) 0.0336(8) Uani 1 1 d . . .
C8 C 0.1096(5) 0.7980(5) -0.2145(4) 0.0295(8) Uani 1 1 d . . .
H8 H 0.012 0.7389 -0.2496 0.035 Uiso 1 1 calc R . .
O4 O 0.2773(4) 0.8305(5) 0.1130(4) 0.0524(11) Uani 1 1 d . . .
C12 C 0.1605(5) 0.8049(4) 0.1257(4) 0.0303(8) Uani 1 1 d . . .
O3 O -0.1806(4) 0.8386(5) 0.1827(4) 0.0534(11) Uani 1 1 d . . .
C11 C -0.1021(5) 0.8368(5) 0.1223(4) 0.0323(9) Uani 1 1 d . . .
C13 C 0.0984(6) 0.7466(5) 0.2166(4) 0.0373(10) Uani 1 1 d . . .
H13A H 0.1708 0.7291 0.257 0.056 Uiso 1 1 calc R . .
H13B H 0.0118 0.6631 0.1808 0.056 Uiso 1 1 calc R . .
H13C H 0.0722 0.8097 0.2709 0.056 Uiso 1 1 calc R . .
C3 C 0.5160(6) 0.3258(5) 0.0087(4) 0.0381(11) Uani 1 1 d . . .
H3A H 0.4259 0.3352 -0.0077 0.057 Uiso 1 1 calc R . .
H3B H 0.4934 0.2323 -0.0009 0.057 Uiso 1 1 calc R . .
H3C H 0.5793 0.3555 -0.0441 0.057 Uiso 1 1 calc R . .
O2 O 0.8872(4) 0.7870(4) 0.4328(4) 0.0575(11) Uani 1 1 d . . .
C10 C 0.8235(7) 0.9405(6) 0.5606(5) 0.0556(16) Uani 1 1 d . . .
H10A H 0.8218 0.9304 0.6367 0.083 Uiso 1 1 calc R . .
H10B H 0.7413 0.9586 0.5382 0.083 Uiso 1 1 calc R . .
H10C H 0.9143 1.0146 0.5621 0.083 Uiso 1 1 calc R . .
C14 C 0.2028(7) 0.8015(8) -0.3958(5) 0.0535(15) Uani 1 1 d . . .
H14A H 0.2204 0.7216 -0.4234 0.08 Uiso 1 1 calc R . .
H14B H 0.2732 0.8741 -0.4173 0.08 Uiso 1 1 calc R . .
H14C H 0.1044 0.7826 -0.43 0.08 Uiso 1 1 calc R . .
C7 C 0.3413(5) 0.9235(5) -0.1923(4) 0.0335(9) Uani 1 1 d . . .
H7 H 0.4349 0.9686 -0.2071 0.04 Uiso 1 1 calc R . .
C6 C 0.3044(4) 0.9291(4) -0.0882(4) 0.0294(8) Uani 1 1 d . . .
H6 H 0.3687 0.9793 -0.0167 0.035 Uiso 1 1 calc R . .
 
loop_
    _atom_site_aniso_label
    _atom_site_aniso_U_11
    _atom_site_aniso_U_22
    _atom_site_aniso_U_33
    _atom_site_aniso_U_23
    _atom_site_aniso_U_13
    _atom_site_aniso_U_12
Rh1 0.01929(13) 0.02520(14) 0.01717(12) 0.00436(10) 0.00213(10) 0.00874(11)
I2 0.02124(12) 0.03993(15) 0.02399(12) 0.01297(10) 0.00144(9) 0.01137(10)
Rh2 0.01721(12) 0.02058(13) 0.02415(13) 0.00634(10) 0.00226(10) 0.00968(10)
I3 0.02308(12) 0.02375(12) 0.02595(12) 0.00142(9) -0.00307(9) 0.01120(9)
I1 0.04303(17) 0.03649(15) 0.03487(15) 0.01298(12) 0.00267(12) 0.02136(13)
I4 0.02864(13) 0.02145(12) 0.04026(15) 0.00842(10) -0.00087(11) 0.00816(10)
N1 0.0223(15) 0.0285(16) 0.0199(14) 0.0058(12) 0.0053(12) 0.0109(13)
C9 0.059(3) 0.079(4) 0.0231(19) 0.026(2) 0.018(2) 0.060(3)
N2 0.0293(17) 0.0270(16) 0.0223(15) 0.0033(13) 0.0068(13) 0.0108(14)
C4 0.034(2) 0.038(2) 0.032(2) 0.0097(18) 0.0120(17) 0.0215(19)
C5 0.0251(19) 0.041(2) 0.0270(19) 0.0092(17) 0.0058(15) 0.0165(17)
C1 0.030(2) 0.049(3) 0.027(2) 0.0042(18) 0.0020(16) 0.022(2)
C2 0.0232(17) 0.0298(19) 0.0225(17) 0.0065(14) 0.0054(14) 0.0110(15)
O1 0.052(2) 0.082(3) 0.0344(19) -0.0075(19) 0.0048(17) 0.041(2)
N3 0.0195(14) 0.0249(15) 0.0287(16) 0.0058(13) 0.0045(12) 0.0110(12)
N4 0.0333(19) 0.044(2) 0.0289(17) 0.0106(16) 0.0087(15) 0.0220(17)
C8 0.0248(18) 0.035(2) 0.030(2) 0.0077(16) 0.0046(15) 0.0166(17)
O4 0.0353(19) 0.077(3) 0.069(3) 0.044(2) 0.0055(18) 0.034(2)
C12 0.038(2) 0.0253(19) 0.032(2) 0.0113(16) 0.0074(17) 0.0156(17)
O3 0.040(2) 0.086(3) 0.048(2) 0.027(2) 0.0221(18) 0.035(2)
C11 0.0258(19) 0.041(2) 0.033(2) 0.0147(18) 0.0050(16) 0.0155(18)
C13 0.038(2) 0.047(3) 0.036(2) 0.017(2) 0.0066(19) 0.025(2)
C3 0.041(3) 0.036(2) 0.0228(19) -0.0020(17) 0.0069(17) 0.009(2)
O2 0.036(2) 0.043(2) 0.075(3) 0.012(2) 0.010(2) 0.0032(17)
C10 0.049(3) 0.042(3) 0.050(3) 0.004(2) 0.011(3) -0.001(2)
C14 0.051(3) 0.087(5) 0.030(2) 0.019(3) 0.012(2) 0.036(3)
C7 0.027(2) 0.035(2) 0.040(2) 0.0118(19) 0.0137(18) 0.0147(18)
C6 0.0219(18) 0.0276(19) 0.035(2) 0.0036(16) 0.0054(15) 0.0112(15)
 
 
#----------------------------------------------------------------------------#
#                   MOLECULAR GEOMETRY                                       #
#----------------------------------------------------------------------------#
 
_geom_special_details
;
 All esds (except the esd in the dihedral angle between two l.s. planes)
 are estimated using the full covariance matrix.  The cell esds are taken
 into account individually in the estimation of esds in distances, angles
 and torsion angles; correlations between esds in cell parameters are only
 used when they are defined by crystal symmetry.  An approximate (isotropic)
 treatment of cell esds is used for estimating esds involving l.s. planes.
;
loop_
    _geom_bond_atom_site_label_1
    _geom_bond_atom_site_label_2
    _geom_bond_distance
    _geom_bond_site_symmetry_2
    _geom_bond_publ_flag
Rh1 C1 1.854(4) . ?
Rh1 N1 2.100(3) . ?
Rh1 C9 2.217(6) . ?
Rh1 I1 2.6530(5) . ?
Rh1 I2 2.6800(5) 2_666 ?
Rh1 I2 2.9581(6) . ?
I2 Rh1 2.6799(5) 2_666 ?
Rh2 C11 1.859(5) . ?
Rh2 C12 2.057(5) . ?
Rh2 N3 2.105(3) . ?
Rh2 I4 2.6474(6) . ?
Rh2 I3 2.6694(6) . ?
Rh2 I3 2.9780(5) 2_575 ?
I3 Rh2 2.9780(5) 2_575 ?
N1 C2 1.326(5) . ?
N1 C5 1.383(5) . ?
C9 O2 1.149(6) . ?
C9 C10 1.368(8) . ?
N2 C2 1.340(5) . ?
N2 C4 1.367(6) . ?
N2 C3 1.461(5) . ?
C4 C5 1.367(6) . ?
C4 H4 0.95 . ?
C5 H5 0.95 . ?
C1 O1 1.121(6) . ?
C2 H2 0.95 . ?
N3 C8 1.322(5) . ?
N3 C6 1.378(5) . ?
N4 C8 1.351(6) . ?
N4 C7 1.363(6) . ?
N4 C14 1.461(6) . ?
C8 H8 0.95 . ?
O4 C12 1.142(6) . ?
C12 C13 1.509(6) . ?
O3 C11 1.130(6) . ?
C13 H13A 0.98 . ?
C13 H13B 0.98 . ?
C13 H13C 0.98 . ?
C3 H3A 0.98 . ?
C3 H3B 0.98 . ?
C3 H3C 0.98 . ?
C10 H10A 0.98 . ?
C10 H10B 0.98 . ?
C10 H10C 0.98 . ?
C14 H14A 0.98 . ?
C14 H14B 0.98 . ?
C14 H14C 0.98 . ?
C7 C6 1.356(6) . ?
C7 H7 0.95 . ?
C6 H6 0.95 . ?
 
loop_
    _geom_angle_atom_site_label_1
    _geom_angle_atom_site_label_2
    _geom_angle_atom_site_label_3
    _geom_angle
    _geom_angle_site_symmetry_1
    _geom_angle_site_symmetry_3
    _geom_angle_publ_flag
C1 Rh1 N1 174.69(19) . . ?
C1 Rh1 C9 91.1(2) . . ?
N1 Rh1 C9 94.08(15) . . ?
C1 Rh1 I1 88.81(16) . . ?
N1 Rh1 I1 92.25(10) . . ?
C9 Rh1 I1 89.48(11) . . ?
C1 Rh1 I2 87.21(16) . 2_666 ?
N1 Rh1 I2 91.76(10) . 2_666 ?
C9 Rh1 I2 90.13(11) . 2_666 ?
I1 Rh1 I2 175.991(15) . 2_666 ?
C1 Rh1 I2 83.93(16) . . ?
N1 Rh1 I2 90.85(9) . . ?
C9 Rh1 I2 175.06(11) . . ?
I1 Rh1 I2 90.580(17) . . ?
I2 Rh1 I2 89.469(16) 2_666 . ?
Rh1 I2 Rh1 90.530(16) 2_666 . ?
C11 Rh2 C12 92.78(19) . . ?
C11 Rh2 N3 174.42(17) . . ?
C12 Rh2 N3 92.73(16) . . ?
C11 Rh2 I4 89.26(15) . . ?
C12 Rh2 I4 90.96(12) . . ?
N3 Rh2 I4 91.58(9) . . ?
C11 Rh2 I3 88.58(15) . . ?
C12 Rh2 I3 90.59(12) . . ?
N3 Rh2 I3 90.43(9) . . ?
I4 Rh2 I3 177.402(14) . . ?
C11 Rh2 I3 86.09(14) . 2_575 ?
C12 Rh2 I3 178.06(12) . 2_575 ?
N3 Rh2 I3 88.39(9) . 2_575 ?
I4 Rh2 I3 90.600(16) . 2_575 ?
I3 Rh2 I3 87.815(16) . 2_575 ?
Rh2 I3 Rh2 92.185(15) . 2_575 ?
C2 N1 C5 106.0(3) . . ?
C2 N1 Rh1 124.9(3) . . ?
C5 N1 Rh1 129.0(3) . . ?
O2 C9 C10 138.8(7) . . ?
O2 C9 Rh1 108.3(4) . . ?
C10 C9 Rh1 112.9(4) . . ?
C2 N2 C4 108.1(3) . . ?
C2 N2 C3 125.7(4) . . ?
C4 N2 C3 126.3(4) . . ?
C5 C4 N2 106.2(4) . . ?
C5 C4 H4 126.9 . . ?
N2 C4 H4 126.9 . . ?
C4 C5 N1 108.9(4) . . ?
C4 C5 H5 125.6 . . ?
N1 C5 H5 125.6 . . ?
O1 C1 Rh1 176.7(5) . . ?
N1 C2 N2 110.8(4) . . ?
N1 C2 H2 124.6 . . ?
N2 C2 H2 124.6 . . ?
C8 N3 C6 106.4(4) . . ?
C8 N3 Rh2 124.4(3) . . ?
C6 N3 Rh2 128.1(3) . . ?
C8 N4 C7 107.5(4) . . ?
C8 N4 C14 124.9(4) . . ?
C7 N4 C14 127.5(4) . . ?
N3 C8 N4 110.4(4) . . ?
N3 C8 H8 124.8 . . ?
N4 C8 H8 124.8 . . ?
O4 C12 C13 123.5(4) . . ?
O4 C12 Rh2 119.1(4) . . ?
C13 C12 Rh2 117.4(3) . . ?
O3 C11 Rh2 177.3(5) . . ?
C12 C13 H13A 109.5 . . ?
C12 C13 H13B 109.5 . . ?
H13A C13 H13B 109.5 . . ?
C12 C13 H13C 109.5 . . ?
H13A C13 H13C 109.5 . . ?
H13B C13 H13C 109.5 . . ?
N2 C3 H3A 109.5 . . ?
N2 C3 H3B 109.5 . . ?
H3A C3 H3B 109.5 . . ?
N2 C3 H3C 109.5 . . ?
H3A C3 H3C 109.5 . . ?
H3B C3 H3C 109.5 . . ?
C9 C10 H10A 109.5 . . ?
C9 C10 H10B 109.5 . . ?
H10A C10 H10B 109.5 . . ?
C9 C10 H10C 109.5 . . ?
H10A C10 H10C 109.5 . . ?
H10B C10 H10C 109.5 . . ?
N4 C14 H14A 109.5 . . ?
N4 C14 H14B 109.5 . . ?
H14A C14 H14B 109.5 . . ?
N4 C14 H14C 109.5 . . ?
H14A C14 H14C 109.5 . . ?
H14B C14 H14C 109.5 . . ?
C6 C7 N4 106.8(4) . . ?
C6 C7 H7 126.6 . . ?
N4 C7 H7 126.6 . . ?
C7 C6 N3 108.8(4) . . ?
C7 C6 H6 125.6 . . ?
N3 C6 H6 125.6 . . ?
 
#===END

data_6e

#----------------------------------------------------------------------------#
#                   CHEMICAL INFORMATION                                     #
#----------------------------------------------------------------------------#
 
_chemical_name_systematic
;
 ?
;
_chemical_formula_moiety                'C12 H14 I4 N4 O4 Rh2'
_chemical_formula_sum                   'C12 H14 I4 N4 O4 Rh2'
_chemical_formula_weight                991.69
_chemical_compound_source               'synthesis as described'
 
#----------------------------------------------------------------------------#
#                   UNIT CELL INFORMATION                                    #
#----------------------------------------------------------------------------#
 
_symmetry_cell_setting                  monoclinic
_symmetry_space_group_name_H-M          'P 21/c'
_symmetry_space_group_name_Hall         '-P 2ybc'
_symmetry_Int_Tables_number             14
loop_
    _symmetry_equiv_pos_as_xyz
'x, y, z'
'-x, y+1/2, -z+1/2'
'-x, -y, -z'
'x, -y-1/2, z-1/2'
 
_cell_length_a                          7.19570(10)
_cell_length_b                          21.5950(5)
_cell_length_c                          15.1380(3)
_cell_angle_alpha                       90
_cell_angle_beta                        106.1480(10)
_cell_angle_gamma                       90
_cell_volume                            2259.50(8)
_cell_formula_units_Z                   4
_cell_measurement_temperature           180(2)
_cell_measurement_reflns_used           9984
_cell_measurement_theta_min             2.35
_cell_measurement_theta_max             30.47
_cell_measurement_wavelength            0.71073
 
#----------------------------------------------------------------------------#
#                   CRYSTAL INFORMATION                                      #
#----------------------------------------------------------------------------#
 
_exptl_crystal_description              block
_exptl_crystal_colour                   orange
_exptl_crystal_size_max                 0.12
_exptl_crystal_size_mid                 0.06
_exptl_crystal_size_min                 0.04
_exptl_crystal_density_diffrn           2.915
_exptl_crystal_density_method           'not measured'
_exptl_crystal_F_000                    1792
_exptl_special_details
;
 ?
;
 
#----------------------------------------------------------------------------#
#                   ABSORPTION CORRECTION                                    #
#----------------------------------------------------------------------------#
 
_exptl_absorpt_coefficient_mu           6.949
_exptl_absorpt_correction_type          multi-scan
_exptl_absorpt_process_details
;
        [c.f. r.h. blessing, acta cryst. (1995), a51, 33-38]
;
_exptl_absorpt_correction_T_min         0.612
_exptl_absorpt_correction_T_max         0.750
 
#----------------------------------------------------------------------------#
#                   DATA COLLECTION                                          #
#----------------------------------------------------------------------------#
 
_diffrn_ambient_temperature             180(2)
_diffrn_radiation_wavelength            0.71073
_diffrn_radiation_type                  MoK\a
_diffrn_radiation_source          'fine-focus sealed tube'
_diffrn_radiation_monochromator   graphite
_diffrn_measurement_device_type   'Bruker Kappa APEX II'
_diffrn_measurement_method        \w-\f
_diffrn_standards_number          0
_diffrn_standards_interval_count  0
_diffrn_standards_interval_time   0
_diffrn_standards_decay_%         0
_diffrn_radiation_probe                 x-ray
_diffrn_reflns_av_R_equivalents         0.0263
_diffrn_reflns_av_unetI/netI            0.0254
_diffrn_reflns_number                   27483
_diffrn_reflns_limit_h_min              -10
_diffrn_reflns_limit_h_max              10
_diffrn_reflns_limit_k_min              -30
_diffrn_reflns_limit_k_max              30
_diffrn_reflns_limit_l_min              -20
_diffrn_reflns_limit_l_max              21
_diffrn_reflns_theta_min                1.69
_diffrn_reflns_theta_max                30.49
_diffrn_reflns_theta_full               30.49
_diffrn_measured_fraction_theta_full
                                        0.993
_diffrn_measured_fraction_theta_max
                                        0.993
_reflns_number_total                    6845
_reflns_number_gt                       5728
_reflns_threshold_expression            >2sigma(I)
 
#----------------------------------------------------------------------------#
#                   COMPUTER PROGRAMS USED                                   #
#----------------------------------------------------------------------------#
 
_computing_data_collection              'Bruker SMART'
_computing_cell_refinement              'Bruker SMART'
_computing_data_reduction               'Bruker SAINT'  
_computing_structure_solution           'SHELXS-97 (Sheldrick, 1990)'
_computing_structure_refinement         'SHELXL-97 (Sheldrick, 1997)'
_computing_molecular_graphics           'Ortep-3 for Windows (Farrugia, 1997)'
_computing_publication_material
                                   'WinGX publication routines (Farrugia, 1999)'
 
#----------------------------------------------------------------------------#
#                   STRUCTURE SOLUTION
#----------------------------------------------------------------------------#
 
_atom_sites_solution_primary            direct
_atom_sites_solution_secondary          difmap
_atom_sites_solution_hydrogens          geom
 
#----------------------------------------------------------------------------#
#                   REFINEMENT INFORMATION                                   #
#----------------------------------------------------------------------------#
 
_refine_special_details
;
 Refinement of F^2^ against ALL reflections.  The weighted R-factor wR and
 goodness of fit S are based on F^2^, conventional R-factors R are based
 on F, with F set to zero for negative F^2^. The threshold expression of
 F^2^ > 2sigma(F^2^) is used only for calculating R-factors(gt) etc. and is
 not relevant to the choice of reflections for refinement.  R-factors based
 on F^2^ are statistically about twice as large as those based on F, and R-
 factors based on ALL data will be even larger.
;
_refine_ls_structure_factor_coef        Fsqd
_refine_ls_matrix_type                  full
_refine_ls_weighting_scheme             calc
_refine_ls_weighting_details
         'calc w=1/[\s^2^(Fo^2^)+(0.0132P)^2^+3.0953P] where P=(Fo^2^+2Fc^2^)/3'
_refine_ls_hydrogen_treatment           mixed
_refine_ls_extinction_method            none
_refine_ls_number_reflns                6845
_refine_ls_number_parameters            243
_refine_ls_number_restraints            2
_refine_ls_R_factor_all                 0.0311
_refine_ls_R_factor_gt                  0.0214
_refine_ls_wR_factor_ref                0.044
_refine_ls_wR_factor_gt                 0.0415
_refine_ls_goodness_of_fit_ref          1.061
_refine_ls_restrained_S_all             1.061
_refine_ls_shift/su_max                 0.002
_refine_ls_shift/su_mean                0
_refine_diff_density_max                0.974
_refine_diff_density_min                -0.508
_refine_diff_density_rms                0.134
 
#----------------------------------------------------------------------------#
#                   ATOMIC TYPES, COORDINATES AND THERMAL PARAMETERS         #
#----------------------------------------------------------------------------#
 
loop_
    _atom_type_symbol
    _atom_type_description
    _atom_type_scat_dispersion_real
    _atom_type_scat_dispersion_imag
    _atom_type_scat_source
C C 0.0033 0.0016 'International Tables Vol C Tables 4.2.6.8 and 6.1.1.4'
H H 0 0 'International Tables Vol C Tables 4.2.6.8 and 6.1.1.4'
I I -0.4742 1.8119 'International Tables Vol C Tables 4.2.6.8 and 6.1.1.4'
N N 0.0061 0.0033 'International Tables Vol C Tables 4.2.6.8 and 6.1.1.4'
O O 0.0106 0.006 'International Tables Vol C Tables 4.2.6.8 and 6.1.1.4'
Rh Rh -1.1178 0.9187 'International Tables Vol C Tables 4.2.6.8 and 6.1.1.4'
 
loop_
    _atom_site_label
    _atom_site_type_symbol
    _atom_site_fract_x
    _atom_site_fract_y
    _atom_site_fract_z
    _atom_site_U_iso_or_equiv
    _atom_site_adp_type
    _atom_site_occupancy
    _atom_site_symmetry_multiplicity
    _atom_site_calc_flag
    _atom_site_refinement_flags
    _atom_site_disorder_assembly
    _atom_site_disorder_group
I1 I 0.51359(3) 0.245796(11) 1.009983(14) 0.02607(5) Uani 1 1 d . . .
I3 I 0.31684(3) 0.413125(10) 0.877332(14) 0.02251(5) Uani 1 1 d . . .
I2 I 0.67062(3) 0.367798(9) 0.733783(14) 0.02102(5) Uani 1 1 d . . .
I4 I 0.58084(3) 0.544898(10) 0.640235(14) 0.02315(5) Uani 1 1 d . . .
Rh1 Rh 0.58014(3) 0.306686(11) 0.869534(16) 0.01625(5) Uani 1 1 d . . .
Rh2 Rh 0.44422(3) 0.478260(11) 0.755024(16) 0.01638(5) Uani 1 1 d . . .
O1 O 0.8774(4) 0.37965(12) 1.00736(17) 0.0354(6) Uani 1 1 d . . .
O2 O 0.7132(4) 0.19054(12) 0.8301(2) 0.0389(6) Uani 1 1 d . . .
O3 O 0.8032(4) 0.51124(13) 0.90287(19) 0.0420(7) Uani 1 1 d . . .
O4 O 0.1226(4) 0.55337(12) 0.75263(19) 0.0394(6) Uani 1 1 d . . .
N1 N 0.3492(4) 0.26171(12) 0.77511(18) 0.0200(5) Uani 1 1 d . . .
N2 N 0.3128(4) 0.20067(13) 0.7759(2) 0.0246(6) Uani 1 1 d D . .
H102 H 0.408(4) 0.1788(15) 0.811(2) 0.03 Uiso 1 1 d D . .
N3 N 0.2167(4) 0.44863(12) 0.64249(17) 0.0202(5) Uani 1 1 d . . .
N4 N 0.0263(4) 0.45647(14) 0.63290(19) 0.0258(6) Uani 1 1 d D . .
H104 H -0.005(5) 0.4816(14) 0.672(2) 0.031 Uiso 1 1 d D . .
C1 C 0.7678(4) 0.35120(15) 0.9548(2) 0.0227(6) Uani 1 1 d . . .
C9 C 0.7743(4) 0.23780(16) 0.8626(2) 0.0225(6) Uani 1 1 d . . .
C10 C 0.9837(4) 0.25226(17) 0.9013(2) 0.0281(7) Uani 1 1 d . . .
H10A H 1.0142 0.2556 0.9684 0.042 Uiso 1 1 calc R . .
H10B H 1.0133 0.2916 0.8758 0.042 Uiso 1 1 calc R . .
H10C H 1.0614 0.2191 0.8852 0.042 Uiso 1 1 calc R . .
C5 C 0.1956(5) 0.28544(16) 0.7128(2) 0.0267(7) Uani 1 1 d . . .
H5 H 0.1794 0.328 0.6969 0.032 Uiso 1 1 calc R . .
C4 C 0.0627(5) 0.23913(17) 0.6744(2) 0.0301(8) Uani 1 1 d . . .
H4 H -0.0578 0.2437 0.629 0.036 Uiso 1 1 calc R . .
C3 C 0.1431(5) 0.18577(17) 0.7162(2) 0.0296(8) Uani 1 1 d . . .
H3 H 0.0888 0.1454 0.7051 0.036 Uiso 1 1 calc R . .
C8 C 0.2246(5) 0.41824(16) 0.5664(2) 0.0254(7) Uani 1 1 d . . .
H8 H 0.3409 0.406 0.5533 0.03 Uiso 1 1 calc R . .
C7 C 0.0407(5) 0.40709(17) 0.5096(2) 0.0299(8) Uani 1 1 d . . .
H7 H 0.007 0.3862 0.4521 0.036 Uiso 1 1 calc R . .
C6 C -0.0820(5) 0.43266(18) 0.5541(2) 0.0309(8) Uani 1 1 d . . .
H6 H -0.2193 0.4333 0.5328 0.037 Uiso 1 1 calc R . .
C11 C 0.6654(5) 0.49987(15) 0.8481(2) 0.0250(7) Uani 1 1 d . . .
C12 C 0.2898(4) 0.55409(15) 0.7831(2) 0.0220(6) Uani 1 1 d . . .
C13 C 0.4015(5) 0.60284(16) 0.8434(2) 0.0303(8) Uani 1 1 d . . .
H13A H 0.3195 0.6394 0.841 0.045 Uiso 1 1 calc R . .
H13B H 0.5142 0.614 0.8224 0.045 Uiso 1 1 calc R . .
H13C H 0.4448 0.5874 0.9067 0.045 Uiso 1 1 calc R . .
 
loop_
    _atom_site_aniso_label
    _atom_site_aniso_U_11
    _atom_site_aniso_U_22
    _atom_site_aniso_U_33
    _atom_site_aniso_U_23
    _atom_site_aniso_U_13
    _atom_site_aniso_U_12
I1 0.02452(10) 0.02988(12) 0.02142(10) 0.00660(9) 0.00244(8) -0.00584(8)
I3 0.02408(10) 0.02414(10) 0.02082(10) 0.00223(8) 0.00874(8) 0.00184(8)
I2 0.02392(9) 0.01912(10) 0.02181(10) 0.00253(8) 0.00933(8) 0.00256(8)
I4 0.02525(10) 0.02097(10) 0.02433(10) 0.00151(8) 0.00872(8) -0.00255(8)
Rh1 0.01458(10) 0.01558(11) 0.01717(11) 0.00084(9) 0.00205(8) -0.00047(8)
Rh2 0.01715(10) 0.01528(11) 0.01597(11) -0.00078(9) 0.00339(8) 0.00037(8)
O1 0.0313(13) 0.0372(15) 0.0316(13) -0.0057(12) -0.0014(11) -0.0088(11)
O2 0.0275(12) 0.0270(14) 0.0582(18) -0.0085(13) 0.0050(12) 0.0064(11)
O3 0.0332(14) 0.0433(17) 0.0392(15) -0.0083(13) -0.0071(12) -0.0044(12)
O4 0.0313(13) 0.0329(15) 0.0508(17) -0.0135(13) 0.0063(12) 0.0102(11)
N1 0.0193(12) 0.0171(13) 0.0219(13) 0.0007(10) 0.0030(10) -0.0013(10)
N2 0.0221(13) 0.0169(13) 0.0310(15) -0.0010(11) 0.0013(11) -0.0004(10)
N3 0.0203(12) 0.0200(13) 0.0199(12) 0.0003(10) 0.0052(10) -0.0008(10)
N4 0.0200(13) 0.0321(16) 0.0251(14) -0.0018(12) 0.0061(11) -0.0009(12)
C1 0.0210(14) 0.0235(16) 0.0233(16) 0.0034(13) 0.0058(12) 0.0003(12)
C9 0.0203(14) 0.0269(17) 0.0189(15) 0.0034(13) 0.0032(11) -0.0048(13)
C10 0.0173(14) 0.0305(18) 0.0356(19) 0.0020(15) 0.0057(13) 0.0041(13)
C5 0.0259(16) 0.0242(17) 0.0256(17) 0.0008(14) 0.0000(13) -0.0005(13)
C4 0.0201(14) 0.035(2) 0.0289(17) -0.0023(15) -0.0038(13) -0.0015(14)
C3 0.0251(16) 0.0266(18) 0.0343(19) -0.0075(15) 0.0033(14) -0.0076(14)
C8 0.0287(16) 0.0277(18) 0.0193(15) -0.0027(13) 0.0059(13) 0.0006(14)
C7 0.0367(18) 0.0280(18) 0.0207(16) -0.0004(14) 0.0009(14) -0.0034(15)
C6 0.0241(16) 0.035(2) 0.0282(18) -0.0002(15) -0.0010(13) -0.0045(14)
C11 0.0265(16) 0.0216(16) 0.0264(16) -0.0011(13) 0.0065(13) 0.0011(13)
C12 0.0229(15) 0.0260(17) 0.0155(14) 0.0049(12) 0.0031(11) -0.0044(13)
C13 0.0363(18) 0.0258(18) 0.0293(18) -0.0062(15) 0.0097(15) 0.0018(15)
 
 
#----------------------------------------------------------------------------#
#                   MOLECULAR GEOMETRY                                       #
#----------------------------------------------------------------------------#
 
_geom_special_details
;
 All esds (except the esd in the dihedral angle between two l.s. planes)
 are estimated using the full covariance matrix.  The cell esds are taken
 into account individually in the estimation of esds in distances, angles
 and torsion angles; correlations between esds in cell parameters are only
 used when they are defined by crystal symmetry.  An approximate (isotropic)
 treatment of cell esds is used for estimating esds involving l.s. planes.
;
loop_
    _geom_bond_atom_site_label_1
    _geom_bond_atom_site_label_2
    _geom_bond_distance
    _geom_bond_site_symmetry_2
    _geom_bond_publ_flag
I1 Rh1 2.6543(3) . ?
I3 Rh2 2.6815(3) . ?
I3 Rh1 3.0019(3) . ?
I2 Rh1 2.6707(3) . ?
I2 Rh2 2.9562(3) . ?
I4 Rh2 2.6471(3) . ?
Rh1 C1 1.856(3) . ?
Rh1 C9 2.064(3) . ?
Rh1 N1 2.104(3) . ?
Rh2 C11 1.868(3) . ?
Rh2 C12 2.088(3) . ?
Rh2 N3 2.107(3) . ?
O1 C1 1.133(4) . ?
O2 C9 1.165(4) . ?
O3 C11 1.128(4) . ?
O4 C12 1.163(4) . ?
N1 C5 1.339(4) . ?
N1 N2 1.345(4) . ?
N2 C3 1.341(4) . ?
N2 H102 0.878(10) . ?
N3 C8 1.340(4) . ?
N3 N4 1.348(4) . ?
N4 C6 1.333(4) . ?
N4 H104 0.875(10) . ?
C9 C10 1.490(4) . ?
C10 H10A 0.98 . ?
C10 H10B 0.98 . ?
C10 H10C 0.98 . ?
C5 C4 1.394(5) . ?
C5 H5 0.95 . ?
C4 C3 1.364(5) . ?
C4 H4 0.95 . ?
C3 H3 0.95 . ?
C8 C7 1.384(5) . ?
C8 H8 0.95 . ?
C7 C6 1.368(5) . ?
C7 H7 0.95 . ?
C6 H6 0.95 . ?
C12 C13 1.476(5) . ?
C13 H13A 0.98 . ?
C13 H13B 0.98 . ?
C13 H13C 0.98 . ?
 
loop_
    _geom_angle_atom_site_label_1
    _geom_angle_atom_site_label_2
    _geom_angle_atom_site_label_3
    _geom_angle
    _geom_angle_site_symmetry_1
    _geom_angle_site_symmetry_3
    _geom_angle_publ_flag
Rh2 I3 Rh1 91.939(9) . . ?
Rh1 I2 Rh2 93.175(9) . . ?
C1 Rh1 C9 92.11(13) . . ?
C1 Rh1 N1 174.91(12) . . ?
C9 Rh1 N1 92.91(11) . . ?
C1 Rh1 I1 87.58(10) . . ?
C9 Rh1 I1 87.66(9) . . ?
N1 Rh1 I1 91.78(7) . . ?
C1 Rh1 I2 89.62(10) . . ?
C9 Rh1 I2 90.21(9) . . ?
N1 Rh1 I2 91.20(7) . . ?
I1 Rh1 I2 176.422(11) . . ?
C1 Rh1 I3 85.48(10) . . ?
C9 Rh1 I3 176.13(9) . . ?
N1 Rh1 I3 89.56(7) . . ?
I1 Rh1 I3 95.243(9) . . ?
I2 Rh1 I3 86.760(9) . . ?
C11 Rh2 C12 92.33(13) . . ?
C11 Rh2 N3 173.29(12) . . ?
C12 Rh2 N3 93.72(11) . . ?
C11 Rh2 I4 88.02(10) . . ?
C12 Rh2 I4 91.31(8) . . ?
N3 Rh2 I4 88.92(7) . . ?
C11 Rh2 I3 89.61(10) . . ?
C12 Rh2 I3 88.15(8) . . ?
N3 Rh2 I3 93.50(7) . . ?
I4 Rh2 I3 177.544(12) . . ?
C11 Rh2 I2 84.49(10) . . ?
C12 Rh2 I2 174.62(8) . . ?
N3 Rh2 I2 89.70(7) . . ?
I4 Rh2 I2 92.909(9) . . ?
I3 Rh2 I2 87.499(9) . . ?
C5 N1 N2 104.9(3) . . ?
C5 N1 Rh1 130.0(2) . . ?
N2 N1 Rh1 124.4(2) . . ?
C3 N2 N1 111.8(3) . . ?
C3 N2 H102 134(3) . . ?
N1 N2 H102 114(3) . . ?
C8 N3 N4 104.7(3) . . ?
C8 N3 Rh2 129.4(2) . . ?
N4 N3 Rh2 125.9(2) . . ?
C6 N4 N3 111.8(3) . . ?
C6 N4 H104 130(3) . . ?
N3 N4 H104 117(3) . . ?
O1 C1 Rh1 177.6(3) . . ?
O2 C9 C10 124.9(3) . . ?
O2 C9 Rh1 118.1(2) . . ?
C10 C9 Rh1 117.0(2) . . ?
C9 C10 H10A 109.5 . . ?
C9 C10 H10B 109.5 . . ?
H10A C10 H10B 109.5 . . ?
C9 C10 H10C 109.5 . . ?
H10A C10 H10C 109.5 . . ?
H10B C10 H10C 109.5 . . ?
N1 C5 C4 110.8(3) . . ?
N1 C5 H5 124.6 . . ?
C4 C5 H5 124.6 . . ?
C3 C4 C5 105.0(3) . . ?
C3 C4 H4 127.5 . . ?
C5 C4 H4 127.5 . . ?
N2 C3 C4 107.4(3) . . ?
N2 C3 H3 126.3 . . ?
C4 C3 H3 126.3 . . ?
N3 C8 C7 111.0(3) . . ?
N3 C8 H8 124.5 . . ?
C7 C8 H8 124.5 . . ?
C6 C7 C8 105.1(3) . . ?
C6 C7 H7 127.5 . . ?
C8 C7 H7 127.5 . . ?
N4 C6 C7 107.4(3) . . ?
N4 C6 H6 126.3 . . ?
C7 C6 H6 126.3 . . ?
O3 C11 Rh2 177.2(3) . . ?
O4 C12 C13 125.4(3) . . ?
O4 C12 Rh2 117.4(3) . . ?
C13 C12 Rh2 117.1(2) . . ?
C12 C13 H13A 109.5 . . ?
C12 C13 H13B 109.5 . . ?
H13A C13 H13B 109.5 . . ?
C12 C13 H13C 109.5 . . ?
H13A C13 H13C 109.5 . . ?
H13B C13 H13C 109.5 . . ?

#===END

data_8e

#----------------------------------------------------------------------------#
#                   CHEMICAL INFORMATION                                     #
#----------------------------------------------------------------------------#
 
_chemical_name_systematic
;
 ?
;
_chemical_formula_moiety                'C9 H11 I2 N4 O2 Rh'
_chemical_formula_sum                   'C9 H11 I2 N4 O2 Rh'
_chemical_formula_weight                563.93
_chemical_compound_source               'synthesis as described'
 
#----------------------------------------------------------------------------#
#                   UNIT CELL INFORMATION                                    #
#----------------------------------------------------------------------------#
 
_symmetry_cell_setting                  monoclinic
_symmetry_space_group_name_H-M          'P 21/c'
_symmetry_space_group_name_Hall         '-P 2ybc'
_symmetry_Int_Tables_number             14
loop_
    _symmetry_equiv_pos_as_xyz
'x, y, z'
'-x, y+1/2, -z+1/2'
'-x, -y, -z'
'x, -y-1/2, z-1/2'
 
_cell_length_a                          7.4412(3)
_cell_length_b                          12.9941(6)
_cell_length_c                          16.3518(8)
_cell_angle_alpha                       90
_cell_angle_beta                        107.686(4)
_cell_angle_gamma                       90
_cell_volume                            1506.36(12)
_cell_formula_units_Z                   4
_cell_measurement_temperature           180(2)
_cell_measurement_reflns_used           8416
_cell_measurement_theta_min             3.4933
_cell_measurement_theta_max             29.1172
_cell_measurement_wavelength            0.71073
 
#----------------------------------------------------------------------------#
#                   CRYSTAL INFORMATION                                      #
#----------------------------------------------------------------------------#
 
_exptl_crystal_description              block
_exptl_crystal_colour                   orange
_exptl_crystal_size_max                 0.2
_exptl_crystal_size_mid                 0.14
_exptl_crystal_size_min                 0.08
_exptl_crystal_density_diffrn           2.487
_exptl_crystal_density_method           'not measured'
_exptl_crystal_F_000                    1040
_exptl_special_details
;
 ?
;
 
#----------------------------------------------------------------------------#
#                   ABSORPTION CORRECTION                                    #
#----------------------------------------------------------------------------#
 
_exptl_absorpt_coefficient_mu           5.232
_exptl_absorpt_correction_type          multi-scan
_exptl_absorpt_process_details
;
        CrysAlisPro, Oxford Diffraction Ltd.,
Version 1.171.33.66 (release 28-04-2010 CrysAlis171 .NET)
(compiled Apr 28 2010,14:27:37)
Empirical absorption correction using spherical harmonics,
 implemented in SCALE3 ABSPACK scaling algorithm.
;
_exptl_absorpt_correction_T_min         0.420
_exptl_absorpt_correction_T_max         0.658
 
#----------------------------------------------------------------------------#
#                   DATA COLLECTION                                          #
#----------------------------------------------------------------------------#
 
_diffrn_ambient_temperature             180(2)
_diffrn_radiation_wavelength            0.71073
_diffrn_radiation_type                  MoK\a
_diffrn_radiation_source          'Enhance (Mo) X-ray Source'
_diffrn_radiation_monochromator   'graphite'
_diffrn_measurement_device_type   'Xcalibur, Eos, Gemini ultra'
_diffrn_measurement_method        \w-\f
_diffrn_standards_number          0
_diffrn_standards_interval_count  0
_diffrn_standards_interval_time   0
_diffrn_standards_decay_%         0
_diffrn_radiation_probe                 x-ray
_diffrn_reflns_av_R_equivalents         0.037
_diffrn_reflns_av_unetI/netI            0.0255
_diffrn_reflns_number                   16325
_diffrn_reflns_limit_h_min              -9
_diffrn_reflns_limit_h_max              9
_diffrn_reflns_limit_k_min              -16
_diffrn_reflns_limit_k_max              16
_diffrn_reflns_limit_l_min              -20
_diffrn_reflns_limit_l_max              20
_diffrn_reflns_theta_min                3.6
_diffrn_reflns_theta_max                26.37
_diffrn_reflns_theta_full               26.37
_diffrn_measured_fraction_theta_full
                                        0.997
_diffrn_measured_fraction_theta_max
                                        0.997
_reflns_number_total                    3077
_reflns_number_gt                       2691
_reflns_threshold_expression            >2sigma(I)
 
#----------------------------------------------------------------------------#
#                   COMPUTER PROGRAMS USED                                   #
#----------------------------------------------------------------------------#
 
_computing_data_collection              'CrysAlisPro, Oxford Diffraction Ltd.'
_computing_cell_refinement              'CrysAlisPro, Oxford Diffraction Ltd.'
_computing_data_reduction               'CrysAlisPro, Oxford Diffraction Ltd.' 
_computing_structure_solution           'SIR92 (Giacovazzo et al, 1993)'
_computing_structure_refinement         'SHELXL-97 (Sheldrick, 1997)'
_computing_molecular_graphics           'Ortep-3 for Windows (Farrugia, 1997)'
_computing_publication_material
                                   'WinGX publication routines (Farrugia, 1999)'
 
#----------------------------------------------------------------------------#
#                   STRUCTURE SOLUTION
#----------------------------------------------------------------------------#
 
_atom_sites_solution_primary            direct
_atom_sites_solution_secondary          difmap
_atom_sites_solution_hydrogens          geom
 
#----------------------------------------------------------------------------#
#                   REFINEMENT INFORMATION                                   #
#----------------------------------------------------------------------------#
 
_refine_special_details
;
 Refinement of F^2^ against ALL reflections.  The weighted R-factor wR and
 goodness of fit S are based on F^2^, conventional R-factors R are based
 on F, with F set to zero for negative F^2^. The threshold expression of
 F^2^ > 2sigma(F^2^) is used only for calculating R-factors(gt) etc. and is
 not relevant to the choice of reflections for refinement.  R-factors based
 on F^2^ are statistically about twice as large as those based on F, and R-
 factors based on ALL data will be even larger.
;
_refine_ls_structure_factor_coef        Fsqd
_refine_ls_matrix_type                  full
_refine_ls_weighting_scheme             calc
_refine_ls_weighting_details
         'calc w=1/[\s^2^(Fo^2^)+(0.0171P)^2^+1.1621P] where P=(Fo^2^+2Fc^2^)/3'
_refine_ls_hydrogen_treatment           mixed
_refine_ls_extinction_method            none
_refine_ls_number_reflns                3077
_refine_ls_number_parameters            170
_refine_ls_number_restraints            2
_refine_ls_R_factor_all                 0.0281
_refine_ls_R_factor_gt                  0.0213
_refine_ls_wR_factor_ref                0.0478
_refine_ls_wR_factor_gt                 0.0452
_refine_ls_goodness_of_fit_ref          1.05
_refine_ls_restrained_S_all             1.05
_refine_ls_shift/su_max                 0.001
_refine_ls_shift/su_mean                0
_refine_diff_density_max                0.67
_refine_diff_density_min                -0.418
_refine_diff_density_rms                0.099
 
#----------------------------------------------------------------------------#
#                   ATOMIC TYPES, COORDINATES AND THERMAL PARAMETERS         #
#----------------------------------------------------------------------------#
 
loop_
    _atom_type_symbol
    _atom_type_description
    _atom_type_scat_dispersion_real
    _atom_type_scat_dispersion_imag
    _atom_type_scat_source
C C 0.0033 0.0016 'International Tables Vol C Tables 4.2.6.8 and 6.1.1.4'
H H 0 0 'International Tables Vol C Tables 4.2.6.8 and 6.1.1.4'
I I -0.4742 1.8119 'International Tables Vol C Tables 4.2.6.8 and 6.1.1.4'
N N 0.0061 0.0033 'International Tables Vol C Tables 4.2.6.8 and 6.1.1.4'
O O 0.0106 0.006 'International Tables Vol C Tables 4.2.6.8 and 6.1.1.4'
Rh Rh -1.1178 0.9187 'International Tables Vol C Tables 4.2.6.8 and 6.1.1.4'
 
loop_
    _atom_site_label
    _atom_site_type_symbol
    _atom_site_fract_x
    _atom_site_fract_y
    _atom_site_fract_z
    _atom_site_U_iso_or_equiv
    _atom_site_adp_type
    _atom_site_occupancy
    _atom_site_symmetry_multiplicity
    _atom_site_calc_flag
    _atom_site_refinement_flags
    _atom_site_disorder_assembly
    _atom_site_disorder_group
I1 I 0.20545(3) 0.79178(2) 0.819281(15) 0.03167(8) Uani 1 1 d . . .
I2 I -0.33992(3) 0.733261(19) 0.523713(15) 0.03143(7) Uani 1 1 d . . .
Rh1 Rh -0.05635(4) 0.76327(2) 0.667547(17) 0.02242(7) Uani 1 1 d . . .
O1 O -0.2504(4) 0.9572(2) 0.69143(18) 0.0457(7) Uani 1 1 d . . .
O2 O -0.1979(4) 0.5819(2) 0.72321(19) 0.0466(7) Uani 1 1 d . . .
N1 N 0.1037(4) 0.8593(2) 0.59907(18) 0.0286(7) Uani 1 1 d . . .
N2 N 0.2110(5) 0.9415(3) 0.6315(2) 0.0394(8) Uani 1 1 d D . .
H102 H 0.234(6) 0.957(3) 0.6861(10) 0.047 Uiso 1 1 d D . .
N3 N 0.0927(4) 0.6368(2) 0.63989(18) 0.0266(6) Uani 1 1 d . . .
N4 N 0.0243(4) 0.5406(2) 0.6231(2) 0.0306(7) Uani 1 1 d D . .
H104 H -0.085(3) 0.526(3) 0.630(2) 0.037 Uiso 1 1 d D . .
C1 C -0.1810(5) 0.8821(3) 0.6843(2) 0.0288(8) Uani 1 1 d . . .
C9 C -0.2003(5) 0.6741(3) 0.7294(2) 0.0295(8) Uani 1 1 d . . .
C10 C -0.3114(6) 0.7233(3) 0.7798(3) 0.0477(11) Uani 1 1 d . . .
H10A H -0.3899 0.6714 0.796 0.072 Uiso 1 1 calc R . .
H10B H -0.3922 0.7769 0.7451 0.072 Uiso 1 1 calc R . .
H10C H -0.2256 0.7543 0.8317 0.072 Uiso 1 1 calc R . .
C3 C 0.2855(6) 0.9832(3) 0.5734(3) 0.0463(11) Uani 1 1 d . . .
H3 H 0.3667 1.0413 0.5818 0.056 Uiso 1 1 calc R . .
C4 C 0.2226(6) 0.9268(3) 0.5013(3) 0.0412(10) Uani 1 1 d . . .
H4 H 0.2501 0.9368 0.4488 0.049 Uiso 1 1 calc R . .
C5 C 0.1104(5) 0.8516(3) 0.5195(2) 0.0352(9) Uani 1 1 d . . .
H5 H 0.0458 0.8006 0.4798 0.042 Uiso 1 1 calc R . .
C8 C 0.2569(5) 0.6346(3) 0.6232(3) 0.0376(9) Uani 1 1 d . . .
H8 H 0.3385 0.6922 0.6286 0.045 Uiso 1 1 calc R . .
C7 C 0.2934(5) 0.5378(3) 0.5972(3) 0.0404(10) Uani 1 1 d . . .
H7 H 0.4012 0.5162 0.5821 0.049 Uiso 1 1 calc R . .
C6 C 0.1404(6) 0.4796(3) 0.5979(2) 0.0362(9) Uani 1 1 d . . .
H6 H 0.1211 0.4089 0.5832 0.043 Uiso 1 1 calc R . .
 
loop_
    _atom_site_aniso_label
    _atom_site_aniso_U_11
    _atom_site_aniso_U_22
    _atom_site_aniso_U_33
    _atom_site_aniso_U_23
    _atom_site_aniso_U_13
    _atom_site_aniso_U_12
I1 0.02919(13) 0.04365(16) 0.02011(12) -0.00054(10) 0.00440(9) 0.00276(10)
I2 0.02793(13) 0.04027(15) 0.02341(13) -0.00147(10) 0.00379(10) 0.00068(10)
Rh1 0.02349(14) 0.02749(15) 0.01718(14) 0.00078(11) 0.00755(11) 0.00195(11)
O1 0.0610(19) 0.0415(17) 0.0361(17) 0.0016(13) 0.0170(14) 0.0164(15)
O2 0.0602(19) 0.0395(18) 0.0540(19) 0.0068(14) 0.0383(16) -0.0015(14)
N1 0.0340(16) 0.0311(17) 0.0232(16) -0.0015(13) 0.0124(13) -0.0024(13)
N2 0.055(2) 0.0365(19) 0.0312(19) -0.0035(15) 0.0193(17) -0.0103(16)
N3 0.0275(15) 0.0279(16) 0.0246(16) -0.0012(13) 0.0081(12) 0.0006(12)
N4 0.0340(17) 0.0312(18) 0.0293(17) 0.0014(13) 0.0137(14) -0.0007(14)
C1 0.035(2) 0.034(2) 0.0175(18) 0.0030(15) 0.0076(15) 0.0034(17)
C9 0.0215(17) 0.032(2) 0.033(2) -0.0026(16) 0.0043(15) 0.0014(15)
C10 0.055(3) 0.052(3) 0.046(3) -0.002(2) 0.030(2) -0.007(2)
C3 0.052(3) 0.039(2) 0.055(3) 0.009(2) 0.028(2) -0.004(2)
C4 0.049(2) 0.047(3) 0.038(2) 0.013(2) 0.028(2) 0.011(2)
C5 0.046(2) 0.041(2) 0.0227(19) -0.0038(16) 0.0166(17) -0.0028(18)
C8 0.030(2) 0.040(2) 0.047(2) -0.0081(19) 0.0182(18) -0.0028(17)
C7 0.039(2) 0.043(2) 0.044(3) -0.0027(19) 0.020(2) 0.0104(18)
C6 0.047(2) 0.032(2) 0.031(2) 0.0007(17) 0.0147(18) 0.0088(18)
 
 
#----------------------------------------------------------------------------#
#                   MOLECULAR GEOMETRY                                       #
#----------------------------------------------------------------------------#
 
_geom_special_details
;
 All esds (except the esd in the dihedral angle between two l.s. planes)
 are estimated using the full covariance matrix.  The cell esds are taken
 into account individually in the estimation of esds in distances, angles
 and torsion angles; correlations between esds in cell parameters are only
 used when they are defined by crystal symmetry.  An approximate (isotropic)
 treatment of cell esds is used for estimating esds involving l.s. planes.
;
loop_
    _geom_bond_atom_site_label_1
    _geom_bond_atom_site_label_2
    _geom_bond_distance
    _geom_bond_site_symmetry_2
    _geom_bond_publ_flag
I1 Rh1 2.6743(4) . ?
I2 Rh1 2.6685(4) . ?
Rh1 C1 1.864(4) . ?
Rh1 C9 2.042(4) . ?
Rh1 N3 2.107(3) . ?
Rh1 N1 2.245(3) . ?
O1 C1 1.127(4) . ?
O2 C9 1.204(4) . ?
N1 C5 1.322(4) . ?
N1 N2 1.343(4) . ?
N2 C3 1.351(5) . ?
N2 H102 0.880(10) . ?
N3 C8 1.331(4) . ?
N3 N4 1.345(4) . ?
N4 C6 1.328(5) . ?
N4 H104 0.874(10) . ?
C9 C10 1.478(5) . ?
C10 H10A 0.98 . ?
C10 H10B 0.98 . ?
C10 H10C 0.98 . ?
C3 C4 1.346(6) . ?
C3 H3 0.95 . ?
C4 C5 1.375(5) . ?
C4 H4 0.95 . ?
C5 H5 0.95 . ?
C8 C7 1.382(5) . ?
C8 H8 0.95 . ?
C7 C6 1.370(5) . ?
C7 H7 0.95 . ?
C6 H6 0.95 . ?
 
loop_
    _geom_angle_atom_site_label_1
    _geom_angle_atom_site_label_2
    _geom_angle_atom_site_label_3
    _geom_angle
    _geom_angle_site_symmetry_1
    _geom_angle_site_symmetry_3
    _geom_angle_publ_flag
C1 Rh1 C9 92.16(15) . . ?
C1 Rh1 N3 174.59(13) . . ?
C9 Rh1 N3 93.06(13) . . ?
C1 Rh1 N1 88.61(13) . . ?
C9 Rh1 N1 179.23(13) . . ?
N3 Rh1 N1 86.17(11) . . ?
C1 Rh1 I2 87.42(11) . . ?
C9 Rh1 I2 87.73(10) . . ?
N3 Rh1 I2 91.35(8) . . ?
N1 Rh1 I2 92.22(7) . . ?
C1 Rh1 I1 90.22(11) . . ?
C9 Rh1 I1 87.88(10) . . ?
N3 Rh1 I1 91.41(8) . . ?
N1 Rh1 I1 92.20(7) . . ?
I2 Rh1 I1 174.925(13) . . ?
C5 N1 N2 104.7(3) . . ?
C5 N1 Rh1 129.3(3) . . ?
N2 N1 Rh1 125.9(2) . . ?
N1 N2 C3 111.3(3) . . ?
N1 N2 H102 119(3) . . ?
C3 N2 H102 129(3) . . ?
C8 N3 N4 104.6(3) . . ?
C8 N3 Rh1 129.5(3) . . ?
N4 N3 Rh1 125.2(2) . . ?
C6 N4 N3 112.1(3) . . ?
C6 N4 H104 129(3) . . ?
N3 N4 H104 119(3) . . ?
O1 C1 Rh1 175.6(3) . . ?
O2 C9 C10 120.2(4) . . ?
O2 C9 Rh1 120.0(3) . . ?
C10 C9 Rh1 119.8(3) . . ?
C9 C10 H10A 109.5 . . ?
C9 C10 H10B 109.5 . . ?
H10A C10 H10B 109.5 . . ?
C9 C10 H10C 109.5 . . ?
H10A C10 H10C 109.5 . . ?
H10B C10 H10C 109.5 . . ?
C4 C3 N2 106.9(4) . . ?
C4 C3 H3 126.6 . . ?
N2 C3 H3 126.6 . . ?
C3 C4 C5 105.7(3) . . ?
C3 C4 H4 127.2 . . ?
C5 C4 H4 127.2 . . ?
N1 C5 C4 111.5(3) . . ?
N1 C5 H5 124.3 . . ?
C4 C5 H5 124.3 . . ?
N3 C8 C7 111.2(4) . . ?
N3 C8 H8 124.4 . . ?
C7 C8 H8 124.4 . . ?
C6 C7 C8 105.0(3) . . ?
C6 C7 H7 127.5 . . ?
C8 C7 H7 127.5 . . ?
N4 C6 C7 107.1(3) . . ?
N4 C6 H6 126.4 . . ?
C7 C6 H6 126.4 . . ?

#===END
